# Supplementary material for: Genome sequencing reveals metabolic and cellular interdependence in an amoeba-kinetoplastid symbiosis
Source: PubMed Central journal article supplement (PMC5601477; doi:10.1038/s41598-017-11866-x), 2017-09-15
Supplement: 41598_2017_11866_MOESM1_ESM.pdf [file 41598_2017_11866_MOESM1_ESM.pdf]

3 **Supplementary Information**

5 **Genome sequencing reveals metabolic and cellular interdependence in an**  
6 **amoeba-kinetoplastid symbiosis**

8 Goro Tanifuji<sup>1,2</sup>, Ugo Cenci<sup>1,2</sup>, Daniel Moog<sup>1,2</sup>, Samuel Dean<sup>3</sup>, Takuro Nakayama<sup>4</sup>,  
9 Vojtěch David<sup>1,2,5</sup>, Ivan Fiala<sup>5</sup>, Bruce A. Curtis<sup>1,2</sup>, Shannon Sibbald<sup>1,2</sup>, Naoko T.  
10 Onodera<sup>1,2</sup>, Morgan Colp<sup>1,2</sup>, Pavel Flegontov<sup>5,6</sup>, Jessica Johnson-MacKinnon<sup>1,2</sup>, Michael  
11 McPhee<sup>1,2</sup>, Yuji Inagaki<sup>4,7</sup>, Tetsuo Hashimoto<sup>7</sup>, Steven Kelly<sup>8</sup>, Keith Gull<sup>3</sup>, Julius  
12 Lukeš<sup>5,9,10</sup>, and John M. Archibald<sup>1,2,10</sup>

14 <sup>1</sup>Department of Biochemistry & Molecular Biology, Dalhousie University, Halifax, Nova  
15 Scotia, Canada. <sup>2</sup>Centre for Comparative Genomics and Evolutionary Bioinformatics,  
16 Dalhousie University, Halifax, Nova Scotia, Canada. <sup>3</sup>Sir William Dunn School of  
17 Pathology, University of Oxford, Oxford, United Kingdom. <sup>4</sup>Center for Computational  
18 Sciences, University of Tsukuba, Japan. <sup>5</sup>Institute of Parasitology, Biology Centre,  
19 Czech Academy of Sciences, České Budějovice, Czech Republic. <sup>6</sup>Life Science  
20 Research Centre, Faculty of Science, University of Ostrava, Ostrava, Czech Republic.  
21 <sup>7</sup>Graduate School of Life and Environmental Sciences, University of Tsukuba, Japan.  
22 <sup>8</sup>Department of Plant Sciences, University of Oxford, Oxford, United Kingdom. <sup>9</sup>Faculty  
23 of Sciences, University of South Bohemia, České Budějovice, Czech Republic.  
24 <sup>10</sup>Canadian Institute for Advanced Research, CIFAR Program in Integrated Microbial  
25 Biodiversity, Toronto, Canada. Correspondence and requests for materials should be  
26 addressed to J.M.A. (email: john.archibald@dal.ca).

## 28 **Supplementary Note 1. Genomes, Transcriptomes and Proteomes**

29

### 30 **1.1. Strand polarity in the *Perkinsela* sp. nuclear genome**

31 A non-random pattern of gene orientation is readily apparent in the *Perkinsela* sp.  
32 nuclear genome, similar to that seen in the genomes of trypanosomatid parasites<sup>1,2</sup> and  
33 to a lesser extent, that of the free-living bodonid *Bodo saltans*<sup>3</sup>. The average number of  
34 consecutive genes on the same strand in the *Perkinsela* sp. genome was found to be  
35 4.5 (median = 3.0). This compares to an average of 12.3 (median = 4.0) for  
36 *Trypanosoma brucei* 427 (ver 4.2) and 39.5 (median = 15) for *Leishmania major* Friedlin  
37 (ver. 4.2). As a control, the mean and median values calculated for the *P.*  
38 *pemaquidensis* (i.e., host) nuclear genome were 1.7 and 1.0, respectively. Three  
39 prominent examples of strand polarity in the *Perkinsela* sp. genome are shown in Fig.  
40 S1.1. Examination of the sizes of intergenic regions between divergent and convergent  
41 gene blocks revealed that both are greater than the mean intergenic distance for the  
42 genome as a whole, which is ~515 bp (Table 1, main text). With a minimum gene block  
43 size of  $\geq 4$ , the mean intergenic distances were 671 and 1,381 bp for divergent and  
44 convergent gene blocks, respectively (i.e., gene blocks whose transcription is oriented  
45 away or towards one another).

46

### 47 **1.2. *Perkinsela* sp. mobile genetic elements**

48 The nuclear genomes of kinetoplastids are typically rich in mobile genetic elements (or  
49 transposable elements)<sup>1,4,5</sup>. 62 putative proteins with similarity to retrotransposons were  
50 found in the *Perkinsela* sp. final protein set (BlastP cutoff of  $e < 1e-10$ ), and an additional  
51 148 retrotransposon-like sequences were identified using tblastN against genomic  
52 scaffolds (minimum length of 100 bp and a cutoff of  $e < 1e-10$ ). 57 of these 148 coding  
53 regions were inspected manually, 17 of which were predicted to be pseudogenes (i.e.,  
54 they were degenerate in various ways, including the presence of numerous frame  
55 shifts). The strongest matches were to the L1*Tc* element of *T. cruzi*<sup>6</sup>, which belongs to  
56 the *ingi* family of non-LTR retrotransposons. RT-PCR (data not shown) was used to  
57 amplify a complete L1*Tc*-like sequence from *Perkinsela* sp., which had a spliced leader  
58 sequence at its 5' end, indicating that at least some of these elements are expressed

59 and functional. Approximately 40 sequences showed weak similarity to the SIDER  
60 elements found in *Leishmania* genomes (Short Interspersed DEgenerated  
61 Retroposons<sup>7</sup>).

62 As a control, we searched for transposable elements in the genomic scaffolds  
63 assigned to the host of *Perkinsela* sp., i.e., *P. pemaquidensis*. Not surprisingly, >30  
64 sequences were identified with significant matches to non-LTR retrotransposons in  
65 other amoebozoans, most notably *Entamoeba histolytica*. Importantly, none of these *P.*  
66 *pemaquidensis* sequences showed significant similarity to any of the retrotransposon or  
67 retrotransposon-like sequences predicted for *Perkinsela* sp., providing additional  
68 confidence in our ability to distinguish between host- and endosymbiont-derived  
69 genomic scaffolds.

70

### 71 **1.3. *Perkinsela* sp. spliced leader RNA genes**

72 Using the previously identified *Perkinsela* sp. spliced leader (SL) RNA gene<sup>8</sup> as a  
73 BlastN query, we identified >500 distinct matching sequences distributed on many  
74 different scaffolds. Interestingly, only a single intact (and presumably functional) SL  
75 RNA gene could be identified (on scaffold 688; Table S1.3.1). This gene encodes a 38  
76 bp SL mini-exon and a 468 bp SL intron. We predict that scaffold 688 contains a  
77 tandem array of SL RNA genes, as suggested by Tanifuji et al.<sup>8</sup>, although this could not  
78 be verified due to the presence of sequence gaps. Manual investigation of 71 of 531 SL  
79 RNA and SL RNA-like coding regions revealed genes in various stages of decay. These  
80 included genes with insertions / deletions as well as stand-alone SL introns, the latter  
81 presumably the result of reverse transcription and genomic reintegration. We also found  
82 >30 instances of 'stand-alone' sequences matching only the mini exon and the first 20  
83 nucleotides of the SL RNA intron. We speculate that at least some of the  
84 retrotransposons in *Perkinsela* sp. (above), which have a reverse transcriptase (RT)  
85 domain-encoding region, provide the RT activity producing cDNA copies of the SL RNA  
86 introns, which are frequently inserted into the genome. Interestingly, we also identified  
87 24 instances in which retrotransposon-like sequences were found in close proximity to  
88 SL RNA-like elements (Table S1.3.2). This arrangement is reminiscent of the SLACS  
89 (spliced leader-associated conserved sequence) type of site-specific non-LTR

90 retrotransposons found in various *Trypanosoma* species (e.g., refs<sup>9,10</sup>). However, the  
91 SL-RNA gene-associated retrotransposon coding regions we found in *Perkinsela* sp. do  
92 not bear any specific affinity to the SLACS-type elements of trypanosomatids; they are  
93 instead more like the *ingi*-type elements discussed in the previous section. A possible  
94 link between retrotransposon spread and SL RNA genes in the *Perkinsela* sp. nuclear  
95 genome is worthy of further investigation.

96

#### 97 **1.4. *Perkinsela* sp. leucine-rich proteins**

98 A curious feature of the *Perkinsela* sp. nuclear genome is the presence of hundreds of  
99 hypothetical genes encoding leucine-rich proteins, most of which have little or no  
100 sequence similarity to proteins encoded by other sequenced genomes. 462 such  
101 proteins were identified by BlastP against our final set of AGUSTUS-predicted proteins,  
102 and hundreds more were detected using tBLASTn against the genomic scaffolds (e-  
103 value cutoff of  $<1e-10$  and a minimum of 100 bp in length). Sequence similarity amongst  
104 the *Perkinsela* sp. leucine-rich proteins varies greatly: many form clusters of highly  
105 similar sequences while others are not obviously homologous to one another (i.e., they  
106 are similar solely by virtue of their repetitive, leucine-rich sequences). We could find no  
107 evidence that these leucine-rich repeat proteins are divergent homologs of the bodonin  
108 proteins of *Bodo saltans*; BLAST searches using various bodonins as queries  
109 (BS90090, BS52525, BS08390, BS73585, BS90835, BS11510, BS31875, BS37140,  
110 BS11320, BS92780) yielded no significant hits in the *Perkinsela* sp. genome. Although  
111 many of them are supported by RNA-seq expression data, the significance of the  
112 leucine-rich proteins to the biology of *Perkinsela* sp. is unclear.

113

#### 114 **1.5. Mitochondrial Genomes: Structure and Coding Capacity**

115 The *P. pemaquidensis* mitochondrial genome is a circular mapping molecule 48,522 bp  
116 in size and with an average G/C content of 22.2% (Fig. S1.5.1). It contains 40 protein  
117 genes, single-copy large- and small-subunit rRNA genes, and 20 tRNA genes. With the  
118 exception of tRNA-Ala, all RNA and protein genes are located on the same strand.  
119 Interestingly, the cytochrome b gene is duplicated; the *cob* and *cob1* duplicates are  
120 separated by *nad3* and an unknown ORF (*orf171*). Overall, the size, coding capacity



121 and strand polarity of the *P. pemaquidensis* mitochondrial genome is very similar to that  
122 found in other amoebozoans such as *Acanthamoeba castellanii*, *Dictyostelium*  
123 *discoideum*, and *Phalansterium* sp. (see ref.<sup>11</sup> and references therein).

124 The mitochondrial genome of the endosymbiont *Perkinsela* sp. was  
125 characterized by David et al.<sup>12</sup>. Briefly, the genome appears to be highly reduced, with  
126 only six protein-coding genes (*cox1*, *cox2*, *cox3*, *cob*, *atp6* and *rps12*) residing on three  
127 distinct scaffolds. Ribosomal RNAs are probably fragmented and too divergent to be  
128 easily detected<sup>12</sup>. The true structure of the endosymbiont mitochondrial genome is  
129 unclear, but likely represents a disordered array of recombining linear fragments.  
130 Similar mitochondrial genome structures were found in *Euglena gracilis*<sup>13</sup>, in  
131 chromerids<sup>14</sup> and in dinoflagellates<sup>15</sup>. Gene expression in the *Perkinsela* sp.  
132 mitochondrion involves extensive RNA editing in the form of U insertions and deletions.

133

#### 134 **1.6. Endosymbiotic Gene Transfer**

135 Using the phylogenomics pipeline described in the Methods and summarized in Figure  
136 S1.6.2, we screened the *P. pemaquidensis* nuclear genome for genes of putative  
137 kinetoplastid (i.e., endosymbiont) ancestry. Our database (Table S1.6.1) was rich in  
138 genomic data from amoebozoans and kinetoplastids, so as to maximize the chances of  
139 identifying genes with anomalous evolutionary histories in our newly sequenced  
140 genomes. After a first round of ‘approximate’ maximum likelihood (ML) tree building  
141 (using FastTree) and sorting (3,846 analyzable trees in total), 1,916 trees showed *P.*  
142 *pemaquidensis* homologs branching with one or more amoebozoan homologs  
143 (consistent with vertical ancestry), and 10 of 35 genes / proteins initially flagged as  
144 possible EGTs were deemed worthy of further consideration. These 10 datasets were  
145 expanded after protein homolog retrieval from public databases and alignments were  
146 regenerated and trimmed. Phylogenetic trees were then reconstructed using rigorous  
147 ML and Bayesian methods. We also re-examined the scaffolds on which these genes  
148 were found and revisited the SL RNA / Total RNA library ratios for the contigs in  
149 question in order to confirm their genomic location.

150 Eight genes / proteins (each with RNA-seq support) were ultimately identified as  
151 being robust candidates for EGT, the topologies of five of which are consistent with

152 transfer from the nuclear genome of *Perkinsela* sp. to that of *P. pemaquidensis* (Table  
153 S1.6.3). Three genes with particularly strong kinetoplastid phylogenetic signatures were  
154 identified: a peptidase M20-like protein (Fig. S1.6.1a), a putative mitochondrial  
155 ADP/ATP translocase (Fig. S1.6.1b), and a generic mitochondrial carrier protein (Fig.  
156 S1.6.1c; in this case, *P. pemaquidensis* contains two homologs that branch robustly  
157 next to one another in the phylogeny, consistent with a gene duplication event after  
158 EGT). For six of these eight genes, a clear homolog still resides in the *Perkinsela* sp.  
159 nuclear genome, and in two cases (genes for a retrotransposon hotspot-like protein and  
160 a protein of unknown function; Fig. S1.6.1g and h) homologs could not be detected in  
161 any other known genome (i.e., they are *only* found in the host amoeba nuclear genome  
162 and the endosymbiont *Perkinsela* sp.).

163 Curiously, three of the eight EGT candidates encode proteins with  
164 mitochondrion-associated predicted functions. N-terminal sequence analyses did not  
165 provide robust support for the mitochondrial targeting of some or all of the  
166 endosymbiont-derived proteins. However, the mitochondrial ADP/ATP translocase  
167 (NPAc3631A) (Fig. S1.6.3a), as well as both of the mitochondrial carrier protein  
168 duplicates (Fig. S1.6.3b), were found to contain mitochondrial carrier protein signatures  
169 (PX[D/E]XX[K/R])<sup>16</sup>, suggesting that these three proteins are indeed organelle localized  
170 (the homologs of these three proteins encoded in the *Perkinsela* sp. nuclear genome  
171 also contain such signatures). The biological significance of these endosymbiont-  
172 derived, host mitochondrion-targeted proteins is unclear, although it is possible that they  
173 mediate solute transport and contribute to the connectivity of the host and  
174 endosymbiont metabolisms (see main text and below).

175 We next carried out a phylogenetic analysis of 2,633 'treeable' proteins encoded  
176 in the *Perkinsela* sp. nuclear genome. In 59% of these trees (1,559 of 2,633) the  
177 *Perkinsela* sp. homolog branched with one or more kinetoplastid homologs, as would be  
178 expected given the endosymbiont's known ancestry. Of 2,633 proteins, two genes of  
179 potential amoebozoan origin were detected, suggestive of reverse endosymbiotic gene  
180 transfer. However, upon close inspection, these genes and the contigs they reside on  
181 could not be definitively assigned to the endosymbiont genome.

182 Finally, we carried out a BlastN-based analysis to explore the possibility that  
183 DNA transfers involving both coding and non-coding regions between the endosymbiont  
184 and host nuclear genomes are frequent. Here we focused only on scaffolds that were  
185 unambiguously assigned as either host or endosymbiont origin. Accounting for spurious  
186 matches between conserved genes (e.g., ribosomal RNA genes, elongation factors,  
187 heat shock proteins, etc.), we found no evidence of ‘recent’ and ongoing DNA transfer  
188 from endosymbiont to host or vice versa (data not shown). Overall, we conclude that  
189 DNA transfer from *Perkinsela* sp. to *P. pemaquidensis* is / has been infrequent and that  
190 the impact of EGT in shaping this obligate endosymbiotic relationship has been minimal.  
191 This may be related to potential incompatibilities between host and endosymbiont  
192 splicing and/or transcription machineries, and the presence of one or at most a few  
193 endosymbionts present per amoeba in *Paramoeba* species (e.g., refs<sup>17,18</sup>). In the case  
194 of mitochondria and chloroplasts, the frequency of EGT is directly related to the number  
195 of organelles per cell, with organelle lysis presumably serving as the main source of  
196 transferred DNA<sup>19,20</sup>.

197 During the course of our detailed investigation of the metabolic and cell biological  
198 features of *Perkinsela* sp. and *P. pemaquidensis*, we identified several genes whose  
199 evolutionary distributions were suggestive of EGT and lateral gene transfer, despite the  
200 fact that they were not detected as putative transfers using the pipeline-based approach  
201 described in this section. For example, we identified an unusual P-type ATPase  
202 encoded by the *P. pemaquidensis* nuclear genome (protein ID c5648A), which bears  
203 similarity to kinetoplastid-type Na<sup>+</sup>/K<sup>+</sup> transporters. Phylogenetic analyses are  
204 ambiguous as to whether or not this is an EGT.

205

### 206 **1.7. Mitochondrial Proteome of *Perkinsela* sp.**

207 To identify nucleus-encoded, mitochondrial-targeted proteins in *Perkinsela* sp., we  
208 combined ‘top-down’ and ‘bottom-up’ approaches. A total of 1,460 proteins were found  
209 to possess putative N-terminal mitochondrial targeting peptides by one or more of three  
210 prediction tools (TargetP, Predotar and PredSL); 424 proteins were predicted by all  
211 three (Fig. S1.7.1a). The use of Hidden Markov Model-based similarity searches using a  
212 curated set of mitochondrial proteins derived mostly from proteomic studies of *T. brucei*

213 *brucei* TREU 927<sup>21-24</sup> resulted in a set of 544 *Perkinsela* sp. proteins predicted to be  
214 mitochondrial. 44.9% of these 544 proteins overlapped with the set of putative  
215 mitochondrial proteins predicted by all three N-terminal targeting classifiers; an  
216 additional 37.7% of these proteins were predicted by only one or two tools. The final set  
217 of 721 proteins (Table S1.7.1) is thus composed of 94 proteins predicted solely on the  
218 basis of similarity to known mitochondrial homologs, 178 proteins which possess a  
219 predicted mitochondrial targeting peptide according to all three prediction tools, and 449  
220 proteins predicted by both approaches.

221 Fig. S1.7.1b shows a KEGG functional breakdown of the 721 mitochondrial-  
222 targeted proteins. As expected, a large fraction of the proteins predicted solely on the  
223 basis of targeting peptides were hypothetical in nature; of the 721 proteins, only 213  
224 could be functionally annotated using KEGG (with 160 unique KO tools). Consistent  
225 with the results of David et al.<sup>12</sup>, the mitochondrial proteome of *Perkinsela* sp. is rich in  
226 proteins involved in RNA editing, transcription and translation. In addition, proteins  
227 involved in hallmark mitochondrial processes such as protein import and iron-sulfur  
228 cluster biogenesis are retained. The most apparent reduction has taken place in energy  
229 metabolism: while a reduced set of genes / proteins for respiratory chain complexes II,  
230 III, IV, and V persist, the core complex I subunits are missing entirely<sup>12</sup>. It is conceivable  
231 that the main biochemical role of the *Perkinsela* sp. mitochondrion is Fe-S biogenesis,  
232 with the limited suite of respiratory chain complexes serving to maintain membrane  
233 potential, which is critical for mitochondrial protein import.

234

## 235 **Supplementary Note 2. Cell biology.**

236

### 237 **2.1. Absence of Flagellum in *Perkinsela* sp.**

238 To determine whether *Perkinsela* sp. has the capacity to make a flagellum, we searched  
239 the genome for genes known to be associated with flagellum assembly or function. The  
240 evidence, summarized below, suggests that *Perkinsela* sp. either (i) builds a flagellum  
241 that is unlike that of any known organism (not requiring, e.g., basal bodies, the flagellum  
242 transition zone, flagellar associated tubulins, intraflagellar transport proteins (IFTs),  
243 proteins that are otherwise conserved in ciliated eukaryotes, or known kinetoplastid-

244 specific flagellar proteins) or (ii) does not have the capacity to build a flagellum. On  
245 balance, the evidence is most consistent with the second possibility.

246 The *Perkinsela* sp. nuclear genome encodes alpha, beta, and gamma tubulins  
247 but has lost tubulins associated specifically with flagellum function, such as epsilon and  
248 delta tubulin (basal body-associated), and zeta tubulin (kinetoplastid-specific, function  
249 unknown). Furthermore, the *Perkinsela* sp. alpha tubulin has a substitution at K40Q that  
250 is predicted to affect microtubule dynamics (a K370Q substitution is also found), and  
251 beta tubulin is missing two motifs required for attachment of dynein arms and  
252 specification of the central pair (below). *Bodo saltans* has retained alpha, beta, gamma,  
253 delta, epsilon, and zeta tubulins, suggesting that their apparent absence in *Perkinsela*  
254 sp. is not an artifact of evolutionary distance from *T. brucei* (Table S2.1.1).

255 Consistent with the tubulin substitutions described above, the *Perkinsela* sp.  
256 genome encodes no obvious homologs of a set of 21 conserved and functionally  
257 important dynein proteins. These include outer and inner arm dyneins, intermediate  
258 chain proteins, dynein docking proteins, radial spoke proteins, and central pair proteins  
259 (including the conserved protein PF16). Three proteins typically annotated as  
260 cytoplasmic dyneins are also absent, two of which have been shown to localize to the  
261 flagella of *T. brucei* and *Leishmania*, suggesting that they are functional in the flagellum  
262 in kinetoplastids. Again, homologs of these 'cytoplasmic' dyneins are found in *Bodo*  
263 *saltans* (Table S2.1.1).

264 *Perkinsela* sp. has lost all of the genes for proteins shown experimentally to  
265 localize to the basal body and flagellar transition zone (TZ). Many of these are ancient  
266 modules that are otherwise well conserved, including in ciliated kinetoplastids, such as  
267 components of the MKS complex (MKS6, MKS1, tectonic, etc.) and the BBSome  
268 complex (BBS5, BBS7, etc.). Canonical proteins such as SAS6 (which makes up the  
269 basal body 'cartwheel') that are otherwise highly conserved in ciliated organisms are  
270 also missing, as are the centrins (with the exception of TbCentrin4, which is a highly  
271 repetitive sequence and thus likely a false positive). Homologs of kinetoplastid-specific  
272 transition zone proteins (e.g. TZP103.8, TZP157<sup>25</sup>) and basal body proteins are also  
273 missing. In contrast, with the exception of BBS4, all of these proteins are found in *Bodo*  
274 *saltans*. The apparent absence of proteins with which to make a recognizable basal

275 body or transition zone—which are required for flagellum construction—is very strong  
276 evidence that *Perkinsela* sp. does not have a flagellum.

277 Zero of 20 known intraflagellar transport protein genes could be identified in the  
278 *Perkinsela* sp. nuclear genome, whereas *B. saltans* has retained almost all of them  
279 (18/20). To determine whether *Perkinsela* sp. has genes for any additional kinetoplastid-  
280 specific, flagellum-associated structures, we searched for genes encoding proteins of  
281 the flagellar pocket collar (1 protein<sup>26</sup>), bilobe (9 proteins<sup>27</sup>), Inv-like compartment (2  
282 proteins<sup>25</sup>) and flagellar attachment zone (FAZ; 6 proteins<sup>28</sup>). Only one bilobe and one  
283 FAZ gene were detected, but in both cases these are long repetitive proteins and likely  
284 to be spurious matches. In contrast, *Bodo saltans* has retained 7/9 bilobe proteins, and  
285 3/6 FAZ structures.

286 We next considered the results of two proteomics-based experimental  
287 investigations of the *T. brucei* flagellar proteome<sup>29,30</sup>. Combining these datasets with a  
288 2-peptide cutoff resulted in a list of 433 proteins, which we then used as queries against  
289 the *Perkinsela* sp. nuclear genome. *Perkinsela* sp. has lost >85% of these proteins (only  
290 61/433 remain). Examination of these 61 proteins suggests that they are in fact  
291 proteomics contaminants (e.g., mitochondrial proteins). In comparison, genes for  
292 364/433 of these proteins were identified in the genome of the ciliated kinetoplastid *B.*  
293 *saltans*.

294 Hodges et al.<sup>31</sup> assembled a comprehensive set of proteins that are conserved in  
295 ciliated organisms but not in non-ciliated organisms. Their analyses took into account  
296 data from across the eukaryotic tree of life, including plants, excavates, holozoans and  
297 fungi. Trypanosomes have 143 genes/proteins with a ‘ciliary evolution profile’, 135 of  
298 which have homologs in *Bodo saltans*. In stark contrast, only 3 of these proteins were  
299 detected in *Perkinsela* sp. One of these proteins appears to be a mitochondrial  
300 precursor, another a lipid binding protein, and the third has three predicted  
301 transmembrane domains but no other distinguishing features.

302

## 303 **2.2. *Perkinsela* sp. Cytoskeleton**

304 The sub-pellicular microtubule corset-associated proteins CAP5.5, CAP5.5v and CAP51  
305 were detected in *B. saltans*, but not in *Perkinsela* sp. This suggests that the corset is

306 either absent, or very different, in *Perkinsela* sp., consistent with their absence in  
307 electron micrographs. Interestingly, *Perkinsela* sp. has a clear homolog of the highly  
308 conserved protein XMAP215, which localizes to the tip of the cell body in *T. brucei* and  
309 is involved in adding microtubules subunits to the + end of microtubules. This suggests  
310 that the endosymbiont's microtubule organization bears at least some similarity to that  
311 of *T. brucei*.

312

### 313 **2.3. Kinetoplast DNA (kDNA) Maintenance and Replication**

314 Using *T. brucei* proteins as queries, we searched for, and found, three genes for  
315 topoisomerase II proteins in the *Perkinsela* sp. nuclear genome (Table S2.1.1).

316 Although these proteins are likely to have additional roles beyond kDNA replication, it  
317 does suggest that the core machinery for replicating the kDNA remains. In fact, while *T.*  
318 *brucei* has 3 proteins in this ortholog group and *B. saltans* has 2, *Perkinsela* sp. has 5,  
319 suggesting that some expansion has taken place. In contrast, 4 known components of  
320 the tripartite attachment complex (TAC<sup>32</sup>, TAC102<sup>33</sup>, TAC40<sup>34</sup>, p166<sup>35</sup> and p197<sup>36</sup>)  
321 appear to be missing in *Perkinsela* sp. Two components (p166 and TAC102) are  
322 also missing in *B. saltans*, but given the likely absence of the basal body and the  
323 dispersed nature of the kDNA, it seems likely that the *Perkinsela* sp. has dispensed with  
324 the TAC altogether.

325

### 326 **2.4. *Perkinsela* sp. Kinetochores**

327 *Perkinsela* sp. has clear homologs of 8 of 19 known kinetochore proteins in *T. brucei* (*B.*  
328 *saltans* has 18/19)<sup>37</sup>. No obvious pattern in the retention / loss of these genes / proteins  
329 in *Perkinsela* sp. was apparent.

330

### 331 **2.5. A Glycosome / Peroxisome-like Organelle in *Perkinsela* sp.**

332 A search for genes encoding peroxins, factors involved in biogenesis and protein import  
333 in peroxisome-like organelles (including glycosomes), in the nuclear genome of  
334 *Perkinsela* sp. revealed the presence of several core components. These include the  
335 specific cytosolic receptors for PTS1 (Pex5)- and PTS2 (Pex7)-mediated matrix protein  
336 import (soluble proteins), membrane proteins involved in translocation (Pex5, Pex13,

337 Pex14), and receptor recycling (Pex2, Pex10, Pex12, Pex1, Pex6, Pex4), as well as  
338 factors for peroxisome/glycosome division (Pex11) (Tables S2.5.1 and S2.5.2).  
339 However, proteins typically involved in the insertion of membrane proteins into  
340 peroxisome-like organelles such as Pex19, Pex3, and Pex16 could not be detected in  
341 *Perkinsela* sp. Although Pex3 and Pex19 are known to be involved in the *de novo*  
342 generation of peroxisome-like organelles in general, it is worth noting that Pex3 is  
343 apparently absent in trypanosomatids as well. In terms of primary amino acid sequence,  
344 Pex19 is not highly conserved among eukaryotes and even within kinetoplastids; it is  
345 thus possible that a divergent, but presently undetectable, Pex19 homolog is present in  
346 *Perkinsela* sp. As peroxisome-like organelles originate *de novo* from the ER, *Perkinsela*  
347 sp. might utilize alternative pathways for inserting proteins into glycosome membranes.  
348 This might take place in the ER, via vesicle fusion, or in the cytosol by alternative  
349 factors that have not been identified thus far. Genes for various other factors reported to  
350 be involved in the biogenesis of glycosomes in *Leishmania* (including ATPases,  
351 GTPases and SNAREs<sup>38</sup>) were found in *Perkinsela* sp. (Table S2.5.2). The metabolic  
352 processes predicted to occur in the *Perkinsela* sp. glycosome/peroxisome are  
353 summarized in Fig. S2.5.1, and discussed further in Supplementary Note 3 below).

354 As a point of reference, the host nuclear genome was also screened for peroxin-  
355 encoding genes, which might play a role in the peroxisomes of *P. pemaquidensis*.  
356 Similar to *Perkinsela* sp., a complete set of core components required for matrix protein  
357 import and peroxisome division was detected (Table S2.5.1). However, unlike the  
358 endosymbiont, the host seems to possess factors for peroxisomal membrane protein  
359 insertion and peroxisome biogenesis (Pex 3, Pex16 and Pex19), although a Pex4  
360 homolog could not be detected.

361  
362 **2.6. Endocytosis and Exocytosis in *Perkinsela* sp.** (see also Supplementary Note S3.12.  
363 Endosome / Lysosome / Reservosome)

364 We used a multi-tiered approach to investigate the possibility of endocytosis and  
365 exocytosis in *Perkinsela* sp. In addition to electron microscopy, this included  
366 bioinformatic analyses using OrthoFinder<sup>39</sup>, PFAM-based domain searches, and  
367 consideration of well annotated pathway components in *T. brucei* and other



368 trypanosomes<sup>40</sup>. In some cases the *P. pemaquidensis* nuclear genome was analyzed  
369 as a control, as was the *B. saltans* genome as a control for evolutionary distance. The  
370 results are summarized in Table S2.1.1 (ESCRT components, lysosome and Golgi  
371 factors, Rabs), Table S2.6.1 (PFAM search for putative Rabs), Table S2.6.2 (SNARE  
372 and SNARE-related proteins), and Table S2.6.3 (summary of endocytosis-related  
373 proteins in host and endosymbiont).

374 The *Perkinsela* sp. nuclear genome has genes for a variety of components  
375 related to vesicle trafficking. Of 9 known components of the ESCRT complex in *T.*  
376 *brucei* (required for many trafficking processes) one is possibly present in *Perkinsela* sp.  
377 (VPS4, the same as in *B. saltans*). Similarly, clathrin and most of the SNAREs are also  
378 present, suggesting that clathrin-mediated endocytosis and vesicle fusion during  
379 trafficking occurs, respectively. *Perkinsela* sp. appears to be missing both known  
380 kinetoplastid components of the Golgi apparatus (sec34 and GRIP70), and all four  
381 components of the lysosome, including p67. All are present in *B. saltans*. Moreover,  
382 using OrthoFinder, *Perkinsela* sp. appears to be missing >85% of the Rab proteins  
383 (retaining only 2/16, compared to 15/16 in *Bodo saltans*). The two that remain are Rab1  
384 and Rab2, which have been shown to associate with the Golgi in *T. brucei* and are  
385 required in the early secretory pathway. PFAM analysis was unsuccessful in allowing us  
386 to detect additional Rab protein genes in *Perkinsela* sp. beyond Rab1 and Rab2. For  
387 reference, four PFAM domains were found in known trypanosome RAB proteins: PFAM  
388 Ras, PFAM zf-C3HC4\_3, PFAM Miro, and Pfam-B\_17478. None of these yielded  
389 meaningful matches in the *Perkinsela* sp. genome. All things considered, these  
390 analyses suggest that although *Perkinsela* sp. retains the ability to perform endo- and  
391 exocytosis its intracellular trafficking machinery is highly divergent and reduced,  
392 presumably related to its intracellular lifestyle.

393 An important question relating to the mechanics of endocytosis is the number of  
394 membranes surrounding *Perkinsela* sp. Our results are most consistent with a single  
395 membrane, i.e., the plasma membrane of the endosymbiont is directly exposed to the  
396 cytoplasm of *P. pemaquidensis* (Fig. 1 and Fig. S2.6.1). However, it should be noted  
397 that Perkins and Castagna<sup>41</sup> suggested that *Perkinsela* sp. was surrounded by two  
398 membranes (plasma membrane plus outer amoeba-derived membrane). These authors

399 worked with a different species of amoeba than that studied here (*P. perniciosus* versus  
400 *P. pemaquidensis*). It is thus formally possible (though not likely in our opinion) that the  
401 endosymbionts of different *Paramoeba* species are surrounded by different numbers of  
402 membranes.

403

## 404 **2.7. Membrane Transporters and Protein Secretion**

405 As summarized in Fig. S2.7.1, we used various bioinformatic tools to identify potential  
406 membrane transporters encoded in the nuclear genomes of *Perkinsella* sp. and *P.*  
407 *pemaquidensis*. 226 and 66 membrane transporters were predicted in the *P.*  
408 *pemaquidensis* and *Perkinsella* sp. nuclear genomes, respectively, which were then  
409 annotated and classified according to transportDB<sup>42</sup>. Those in *Perkinsella* sp.  
410 corresponded to a variety of transporter superfamilies, with no superfamily dramatically  
411 overrepresented or depleted relative to those in other kinetoplastids. However, at the  
412 family level, the transporters appear somewhat differentially retained, with the MFS and  
413 F(V-A)ATPase families proportionally overrepresented in *Perkinsella* sp., and the AAAP,  
414 APC and ABC amino acid transporters somewhat underrepresented (Fig. S2.7.2).

415 We used various bioinformatic tools including TargetP, PredSL, Predotar,  
416 TMHMM 2.0 and PredGPI 2.0 to identify proteins possibly secreted by *Perkinsella* sp.  
417 into its host amoeba, as well as putative plasma membrane-localized proteins (Fig.  
418 S2.7.3). 48 proteins are predicted to be secreted from *Perkinsella* sp. to the host  
419 cytoplasm. This includes a phospholipase A2 enzyme, which may speak to the need for  
420 the degradation of phospholipid in order to obtain arachidonate, since no pathway was  
421 predicted in *Perkinsella* sp. to allow synthesis of this compound. 59 transmembrane  
422 domain-containing proteins were predicted to be plasma membrane-localized, and only  
423 two proteins were identified as possibly containing glycosylphosphatidylinositol (GPI)-  
424 anchors, consistent with the lack of obvious GPI-anchor biosynthetic capacity (data not  
425 shown).

426

## 427 **2.8. Cell Cycle**

428 Fig. S2.8.1 shows a KEGG-based summary of orthologous genes involved in the cell  
429 cycle of yeast. Putative orthologs of these proteins in *Perkinsella* sp. and the host

430 amoeba *P. pemaquidensis* were identified through KASS annotation of gene models  
431 (GHOSTX, reciprocal best hit, default eukaryotic query list + tbr). We augmented this list  
432 (Table S2.8.1) with additional cell cycle-related proteins of interest identified by  
433 reciprocal best BlastP hits using *Schizosaccharomyces pombe* and *T. brucei* queries  
434 against the *P. pemaquidensis* and *Perkinsela* sp. genomes, respectively (E-value cutoff  
435  $10^{-20}$ , hits beyond E-value of  $10^{-100}$  and no worse than  $\Delta_{\text{score}}20$  from the best hit were  
436 considered). We also took into consideration searches against two other amoebozoan  
437 genomes, those of *Dictyostelium discoideum* and *Entamoeba histolytica*, and additional  
438 data from GenBank and TriTrypdb (in the case of *T. brucei*).

439 These analyses confirm the presence of at least a handful of genes for the major  
440 phases of the cell cycle in *Perkinsela* sp. These include cyclins and CDKs, MCM  
441 proteins, cohesins, separases, and kinesins (Fig. S2.8.1). Interestingly, homologs of  
442 Origin Recognition Complex (ORC) proteins could not be detected in *Perkinsela* sp. but  
443 were found in *P. pemaquidensis*. In general the suite of cell cycle-related genes in  
444 *Perkinsela* sp. is much smaller than in *P. pemaquidensis*, although not so small that  
445 obvious host dependency must be inferred.

446

### 447 **Supplementary Note 3. Host and Endosymbiont Metabolism**

448

#### 449 **3.1. Metabolic Interdependence between *Perkinsela* sp. and *Paramoeba*** 450 ***pemaquidensis***

451 Figure 3 shows a KEGG-based overview of the predicted metabolic pathways of  
452 *Perkinsela* sp. and its amoebozoan host *Paramoeba pemaquidensis*, rendered using  
453 iPath 2.0 (Interactive Pathway Explorer<sup>43</sup>). There is considerable overlap between the  
454 inferred metabolic capacities of the two organisms; genes / enzymes for many  
455 biochemical pathways are present in both the host and endosymbiont (shown in blue).  
456 Nevertheless, the metabolism of *Perkinsela* sp. is strikingly reduced in various areas,  
457 most notably fatty acid degradation, isoprenoid synthesis, and arginine and proline  
458 biosynthesis. Mosaic metabolic pathways discussed in the main text and below include  
459 glutathione / trypanothione metabolism (Fig. S3.1.1a), ubiquinone / terpenoid-quinone  
460 biosynthesis (Fig. 3c and Fig. S3.1.1b), arginine and proline metabolism (Fig. 3b and

461 Fig. S3.1.1c), fatty acid metabolism (Fig. 3a and Fig. S3.1.1d), purine metabolism (Fig.  
462 3a and Fig. S3.1.1e), terpenoid biosynthesis (Fig. 3a and Fig. S3.1.1f), and the citrate  
463 cycle (tricarboxylic acid, or TCA cycle) (Fig. 3a and Fig. S3.1.1g). The sections that  
464 follow discuss various aspects of endosymbiont and host metabolism, concluding with a  
465 discussion of cell biological issues related to how the two might be connected.

466

### 467 **3.2. Glycolysis and Carbohydrate Metabolism**

468 The glycolytic pathway is the hallmark of glycosomes. In the procyclic form of  
469 *Trypanosoma brucei*, for example, the first seven enzymes of glycolysis (from  
470 hexokinase, HK, to phosphoglycerate kinase, PGK) are glycosome-localized. The  
471 glycolytic pathway is not known to be present in other peroxisome-like organelles  
472 except the glycosomes of kinetoplastids and diplomonids. The *Perkinsela* sp. nuclear  
473 genome was found to encode a complete set of glycolytic enzymes (with one isoform  
474 per enzyme), presumably enabling the conversion of glucose to pyruvate (Fig. S2.5.1).  
475 A search for the presence of potential glycosome targeting signals in the glycolytic  
476 enzymes identified in *Perkinsela* sp. showed that the first seven enzymes contain either  
477 PTS1 (PFK, GAPDH, PGK) or PTS2 (HK, ALD, TIM) signals, with the exception of PGI,  
478 whose PTS signal is unclear. No putative glycosome targeting signals were detected for  
479 the last three enzymes of the pathway (PGM, ENO, PK). These three enzymes  
480 presumably operate in the cytosol, as in other kinetoplastids, resulting in a neutral  
481 glycolysis-related ADP/ATP balance within the putative *Perkinsela* sp. glycosome.

482 We also found a putative PTS1 targeting signal on the *Perkinsela* sp. glycerol-3-  
483 phosphate dehydrogenase (GPDH) enzyme. GPDH could convert dihydroxyacetone  
484 phosphate (DHAP) to glycerol-3-phosphate, which is then probably shuttled to the  
485 mitochondrion where it is converted back to DHAP by a mitochondrial-targeted isoform  
486 of GPDH (which was also identified) and transported back to the glycosome (i.e., a  
487 glycerol-3-phosphate shuttle). This would ensure NAD<sup>+</sup>/NADH balance for the  
488 glycosome-localized reactions of glycolysis. Glycerol kinase (GK), which converts  
489 glycerol-3-phosphate to ATP and glycerol under anoxic conditions in *T. brucei*, is  
490 apparently absent from the *Perkinsela* sp. genome. Net energy from glycolysis might  
491 thus be produced in the *Pekinsela* sp. cytoplasm only via the reaction catalyzed by

492 pyruvate kinase (Fig. S2.5.1).

493 The fate of the end product of glycolysis, pyruvate, is uncertain, as *Perkinsela* sp.  
494 seems to lack the enzymes known to convert pyruvate into acetyl-CoA (specifically  
495 pyruvate dehydrogenase, PDH) so as to connect glycolysis to the TCA cycle (Fig. 3a  
496 and Fig. S3.1.1g). In addition, *Perkinsela* sp. has apparently lost the first three enzymes  
497 of the TCA cycle (citrate synthase, aconitase and isocitrate dehydrogenase), despite the  
498 fact that enzymes for the remaining part of the TCA cycle from alpha-ketoglutarate to  
499 oxaloacetate seem to be present and mitochondrion-localized (Fig. 3a and Table  
500 S2.5.2). Nevertheless, an apparently cytosolic protein that *Perkinsela* sp. might use to  
501 utilize pyruvate is alanine aminotransferase (AAT). This enzyme catalyzes the  
502 conversion of pyruvate and glutamate to alpha-ketoglutarate and alanine and could thus  
503 serve to link glycolysis, amino acid metabolism and the mitochondrial TCA cycle in  
504 *Perkinsela* sp.

505 In addition to the mitochondrion-targeted enzymes of the incomplete TCA cycle,  
506 *Perkinsela* sp. possesses at least two potential TCA cycle enzymes—malate  
507 dehydrogenase, MDH, and fumarate reductase, FR—that might be glycosome-targeted  
508 (they possess predicted PTS1 signals) (Table S2.5.2). Together with  
509 phosphoenolpyruvate carboxykinase (PEPCK, which has a predicted PTS1 signal) and  
510 a malic enzyme (ME, which is PTS1-positive), MDH and FR probably connect the  
511 glycolytic pathway to glycosomal succinate synthesis and the incomplete mitochondrial  
512 TCA cycle (Fig. 3a and Fig. S3.1.1g). If phosphoenol pyruvate from the cytosolic portion  
513 of glycolysis is used as an initial metabolite for this pathway, net ATP could be produced  
514 within the putative *Perkinsela* sp. glycosome, with the total ADP/ATP being the same  
515 that is produced from a complete run-through of the glycolysis pathway (utilizing  
516 cytosolic PK). *Perkinsela* sp. appears to lack the ability to perform gluconeogenesis:  
517 although it possesses a PEPCK, it apparently lacks genes for fructose-1,6-  
518 bisphosphatase (FBP) and pyruvate carboxylase (PC) enzymes. Pyruvate, if produced  
519 at all by glycolysis, might be converted to malate by glycosomal-localized ME or  
520 possibly released into the cytoplasm of the host amoeba cell by a mechanism similar to  
521 that occurring in the blood stages of *T. brucei* (Fig. S2.5.1).

522 With respect to carbohydrate utilizing enzymes, while the composition of the

523 hypothetical *Perkinsela* sp. glycosome is very similar to the *T. brucei* glycosome, there  
524 are also significant differences between the two. In contrast to *T. brucei*, which contains  
525 a complete or near-complete pentose phosphate pathway (PPP), we found no evidence  
526 for glycosome-targeted PPP enzymes in *Perkinsela* sp. In fact, the endosymbiont might  
527 even have lost the oxidative part of the PPP, whereas the reductive portion of the  
528 pathway seems to be located in its cytoplasm.

529 The presence and subcellular distributions of glycolytic enzymes for *P.*  
530 *pemaquidensis* was also investigated. As in *Pekinsela* sp., a complete set of glycolysis  
531 enzymes could be identified in the host nuclear genome. With the exception of TPI/TIM  
532 for which a putative PTS1 signal was predicted, none of the core glycolytic enzymes  
533 showed any clear evidence for targeting beyond the cytoplasm of the host cell.  
534 Glycolysis thus most likely occurs in the cytoplasmic compartment of *P. pemaquidensis*.  
535 In addition to the existence of a complete glycolytic pathway, the host cell harbors the  
536 enzymatic potential to perform gluconeogenesis (genes for FBP, PEPCK and PC  
537 enzymes are present), in contrast to the endosymbiont.

538

### 539 **3.3. Fatty Acid Beta-oxidation**

540 Several genes for enzymes involved in the beta-oxidation of fatty acids were detected in  
541 the *Perkinsela* sp. nuclear genome. In contrast, the host cell contains a complete set of  
542 beta-oxidation enzymes, some of which possess potential peroxisomal targeting signals  
543 (Table S2.5.2).

544

### 545 **3.4. Nucleotide and Nucleotide-sugar Metabolism**

546 In contrast to *T. brucei*, the putative glycosome-like organelle of *Perkinsela* sp. does not  
547 appear to contain any enzymes for sugar-nucleotide metabolism, involving nucleotides  
548 bound to glucose, galactose, fucose or mannose. In fact, we could not identify  
549 homologs for most of the *T. brucei* proteins involved in these processes at all.  
550 Nevertheless, adenylate kinase (AK) and AMP deaminase (AMPD) enzymes, both with  
551 PTS1 signals at their C-termini (Table S2.5.2), are encoded in the *Perkinsela* sp.  
552 genome and, therefore, most likely localized to the glycosome. In addition to these two  
553 enzymes, which are presumably capable of utilizing ADP/ATP, we found a gene

554 encoding a homolog of PMP47, an ADP/ATP transporter, which might reside in the  
555 membrane of the putative *Perkinsela* sp. glycosome and play a key role in mediating  
556 metabolite exchange.

557         Consideration of genomic data suggests that *Perkinsela* sp. might play an  
558 important role in phosphate metabolism of nucleotides for RNA and DNA. While  
559 nucleoside monophosphate kinases for guanine, cytosine and uridine were found in the  
560 nuclear genome of *Perkinsela* sp., we could not find their counterparts in the amoeba  
561 host nuclear genome. Enzymes facilitating conversion between triphosphate and  
562 diphosphate nucleoside forms are encoded by both nuclear genomes. *Perkinsela* sp.  
563 also seems to possess a homolog of ecto-nucleotidase (Ecto-NTPDase), an enzyme  
564 associated with increased virulence in trypanosomes<sup>44</sup>. Ecto-NTPDase  
565 dephosphorylates free nucleotide phosphates in the extracellular space of *T. cruzi*,  
566 which are then imported separately.

567

### 568 **3.5. ROS Metabolism (Trypanothione Metabolism)**

569 As noted elsewhere, enzymes for kinetoplastid-specific trypanothione metabolism are  
570 encoded in the nuclear genome of *Perkinsela* sp. However, none of these proteins were  
571 found to contain putative targeting signals for glycosomal import. Trypanothione  
572 metabolism in *Perkinsela* sp. might therefore be mainly cytosolic and in part  
573 mitochondrial. As there is apparently no beta-oxidation of fatty acids, which is usually a  
574 source of reactive oxygen species (ROS) in peroxisome-like organelles, there would  
575 seem to be no requirement for a glycosome-localized ROS detoxification system in  
576 *Perkinsela* sp.

577

### 578 **3.6. Amino Acid Metabolism**

579 We identified several nucleus-encoded, glycosome-targeted enzymes putatively  
580 involved in amino acid metabolism in *Perkinsela* sp., including S-adenosylmethionine  
581 synthetase (MAT) and homoserine kinase (HSK), both of which produced robust PTS1  
582 signal predictions (Table S2.5.2). Two additional enzymes, aspartate aminotransferase  
583 (GOT) and S-adenosylmethionine homocysteinase (SAH; see acidocalcisome section  
584 below), are also potentially glycosomal, although their PTS1 predictions are less

585 convincing, and they could thus be cytosolic. In other eukaryotes, GOT is typically  
586 localized to the mitochondrion, but in *Perkinsela* sp. there is no indication of  
587 mitochondrial targeting signals (Table S2.5.2). However, as GOT catalyzes the  
588 conversion of aspartate and alpha-ketoglutarate to oxaloacetate and glutamate, it could  
589 play an important role in *Perkinsela* sp. cells, serving to connect (glycosomal or  
590 cytosolic) amino acid metabolism to the incomplete mitochondrial TCA cycle of the  
591 kinetoplastid endosymbiont (Fig. 3 and Fig. S3.1.1g).

592

### 593 **3.7. Sterol / Isoprenoid Metabolism**

594 No genes encoding enzymes for sterol metabolism were identified in the *Perkinsela* sp.  
595 genome. However, a mevalonate kinase (MVK) enzyme with a potential PTS1 targeting  
596 signal was found. The remaining mevalonate pathway (HMGCoA, PMVK and MVD) is  
597 most likely cytosolic.

598

### 599 **3.8. Glycosome-associated Protein Folding, Regulation and Signaling**

600 A Hsp40 molecular chaperone (with a PTS1 signal) and a ubiquitin-specific protease-  
601 like DUB protein were the only “cell biological” factors of the putative *Perkinsela* sp.  
602 glycosome that could be reliably identified via BLAST searches using the *T. brucei*  
603 glycosomal proteome as queries. Additional potential glycosome-targeted candidates in  
604 this category are three kinases (PKA, STK, and CK1) but their PTS1 signal predictions  
605 are weak and they could well be cytosolic. Evidence for glycosomal phosphatases in  
606 *Perkinsela* sp. is lacking. In *T. brucei*, kinases and phosphatases could be involved in  
607 the regulation of glycosomal or glycosome-associated proteins; whether this is true for  
608 *Perkinsela* sp. is unclear.

609

### 610 **3.9. Glycosomal Transporters and Membrane Proteins**

611 Beyond the ADP/ATP transporter PMP47 (see above), little could be inferred about  
612 glycosomal membrane proteins in *Perkinsela* sp. As noted above, homologs of the  
613 classical peroxisome-type, membrane-associated import factors could not be identified,  
614 i.e., Pex3, Pex16, and Pex19. Nevertheless, potential mPTS signals, which are Pex19  
615 binding sites, were found on Pex10, Pex11, and Pe14 (Table S2.5.2). If a Pex19



616 homolog is truly absent, proteins destined for the *Perkinsela* sp. glycosome must use  
617 alternative pathways (see below).

618

### 619 **3.10. PTS1 Motifs in *Perkinsela* sp. Proteins**

620 We performed a systematic search for proteins containing potential C-terminal PTS1  
621 signals based on information taken from Jamhade et al.<sup>38</sup>, i.e., the presence of the tri-  
622 peptide [ASCGPNYTV][KNRHQDS][LMVAIF] within the last four amino acid positions  
623 (accounting for the possible presence of a stop codon (\*) in the fourth position). 321  
624 candidate proteins were identified from an interim set of 5,302 predicted *Perkinsela* sp.  
625 proteins. Of these 321 PTS1 motif-containing proteins, several belong to the glycolysis  
626 pathway discussed above, as well as GOT1, MAT, MVK, Hsp40, AMPD, ME, PPase  
627 (see below), PEPCK, MDH, AK, HSK and DUB. However, the majority of these were not  
628 predicted to contain PTS1 signals with the other prediction tools used in this study (i.e.,  
629 PTS1 predictor and Target signal predictor). This set thus presumably contains many  
630 false positives, but nevertheless served to expand the list of putative glycosomal  
631 proteins in *Perkinsela* sp. for future study (Table S2.5.2). Proteins with positive PTS1  
632 predictions using the motif search above as well as with PTS1 predictor and Target  
633 signal predictor, and for which no conflicting targeting signals were detected, include: an  
634 ankyrin and TPR-domain containing protein; a AAA ATPase domain containing protein  
635 ('fidgetin-like'); VPS16, a protein with homology to vacuolar sorting protein 16; GAP, a  
636 potential GTPase activating protein; NRDE, a member of a protein family predicted to  
637 play a role in protein secretion and Golgi organization (a potential phosphatase); and  
638 several proteins with unknown functions (DUF866, UKF1-5). How many of these are  
639 actually glycosome-localized is unclear. All things considered, the putative glycosome of  
640 *Perkinsela* sp. possesses many, but by no means all, of the biochemical features  
641 associated with glycosomes in other kinetoplastids.

642

### 643 **3.11. Autophagy / Pexophagy**

644 Autophagy is the process by which cells degrade macromolecules and organelles;  
645 pexophagy refers to the breakdown of peroxisome-like organelles, including  
646 glycosomes. In *Trypanosoma*, pexophagy plays a role in regulation of the number of

647 glycosomes per cell during the different life cycle stages and the transitions between  
648 them. There are three general types of autophagy, (i) cytoplasm-to-vacuole-targeting  
649 (Cvt), (ii) microautophagy and (iii) macroautophagy, each with their own diagnostic  
650 molecular markers. In trypanosomatids, Cvt seems to be entirely absent whereas basic  
651 protein factors for micro- / macroautophagy have been identified<sup>45</sup>. A BLAST search  
652 using all potential *T. brucei* autophagy / pexophagy components as queries suggests  
653 that this cellular process is completely absent in *Perkinsela* sp. Although a few proteins  
654 with very weak sequence similarity to certain kinases involved in autophagy were  
655 retrieved, clear homologs of known autophagy-related gene (ATG) factors were not  
656 found (Fig. S3.11.1). It thus seems unlikely that *Perkinsela* sp. operates a classical  
657 micro-/macroautophagy pathway. Certainly *Perkinsela* sp. would not seem to use  
658 autophagy to degrade its single large mitochondrion, although how the organism's  
659 glycosomes are recycled, if at all, is unclear. Alternative mechanisms may exist (see  
660 below).

661

### 662 **3.12. Endosome / Lysosome / Reservosome**

663 In addition to glycosomes, other single membrane-bound organelles include endosomes  
664 and lysosomes / lysosome-related organelles (LROs). In trypanosomatids, the endocytic  
665 pathway ends with what is called the 'reservosome', a lysosome-related organelle that,  
666 in addition to protein degradation, serves as a storage compartment for both lipids and  
667 proteins. Reservosomes thus contain a characteristic set of enzymes involved in protein  
668 and lipid metabolism, as well as several typical endosome- / lysosome-specific factors  
669 that have been characterized in proteomics studies of *Trypanosoma*.

670 The endosomal pathway usually starts with the generation of early endosomes  
671 from the trans-Golgi network (TGN) that can fuse with endocytic vesicles. Whereas  
672 *Perkinsela* sp. cells appear capable of performing endocytosis (above), we were not  
673 able to determine whether this reduced kinetoplastid endosymbiont is likely to be  
674 capable of classical endosome formation. While a large set of endosome-associated  
675 proteins were identified in the nuclear genome of the host amoeba *P. pemaquidensis*,  
676 very few clear homologs were identified in *Perkinsela* sp. (Fig. S3.12.1). As discussed  
677 above, it is not clear whether *Perkinsela* sp. possesses a classical Golgi apparatus, and

678 the set of genes encoding Rab proteins, small GTPases diagnostic of the different  
679 endosome / lysosome maturation steps, is greatly reduced and seems restricted to the  
680 presence of the ER/Golgi-specific Rab1 and Rab2 proteins (Table S2.5.2). In addition,  
681 genes encoding most proteins associated with the endosomal sorting complex required  
682 for transport (ESCRT) could not be found in the *Perkinsela* sp. genome (Fig. S3.12.1  
683 and Table S2.1.1). Altogether, based on protein presence / absence alone, there is very  
684 little evidence for the existence of a classical endosomal / lysosomal system in  
685 *Perkinsela* sp. This raises the question of where the observed endocytic vesicles go.

686 Neither a screen for endosomal / lysosomal components via KEGG annotation  
687 nor a BLAST-based search using 22 reservosome-specific proteins from *T. cruzi*<sup>46</sup> as  
688 queries resulted in clear evidence for the presence of endosomes or lysosomes in  
689 *Perkinsela* sp. Of the 17 reservosome factors known to be specifically involved in  
690 protein metabolism, the *Perkinsela* sp. nuclear genome was found to encode only two  
691 convincing homologs, a S-adenosylhomocysteine hydrolase (SAH) and a M20/M25/M40  
692 peptidase. However, whereas the peptidase does not contain any predicted targeting  
693 signal, SAH contains a putative PTS1 motif (Table S2.5.2). Additional searches for  
694 endosomal/lysosomal proteins revealed that *Perkinsela* sp. contains a homolog of  
695 endosomal integral membrane protein 70 (Emp70). While the presence of Emp70 is  
696 consistent with the existence of an endosome / lysosome / reservosome in *Perkinsela*  
697 sp., it cannot be ruled out that this protein has adopted some other function(s) in  
698 vesicular regulation unrelated to these pathways. The same may be true for the  
699 vacuolar protein sorting protein 45 (Vps45), a homolog for which was detected in the  
700 *Perkinsela* sp. genome, which could somehow be linked to ESCRT, as well as other  
701 vesicular processes (Fig. S3.12.1). A more detailed search for *Perkinsela* sp. proteins  
702 with homology to known *Trypanosoma* reservosome-specific pumps, channel proteins,  
703 and metabolic factors (e.g., those involved in lipid metabolism) will perhaps shed further  
704 light on these uncertainties.

705

### 706 **3.13. Acidocalcisome**

707 Acidocalcisomes are single membrane-bound organelles dedicated to the storage of  
708 inorganic phosphate and calcium. They are present in diverse cells ranging from

709 bacteria to humans and have characteristics in common with LROs (lysosome-related  
710 organelles), including shared protein targeting mechanisms, protein content,  
711 morphology, and acidity. We carried out a BLAST analysis of the *Perkinsela* sp. nuclear  
712 genome using 14 experimentally verified acidocalcisomal proteins from *T. brucei*<sup>47</sup> as  
713 queries. We identified clear homologs of numerous core acidocalcisomal components,  
714 including a vacuolar H<sup>+</sup>-PPase, a vacuolar- Ca<sup>2+</sup>-ATPase, a vacuolar H<sup>+</sup>ATPase (a+d  
715 subunits), a vacuolar iron transporter, a potential phosphate transporter and a putative  
716 vacuolar soluble phosphatase. Remarkably, however, the latter protein was found to  
717 contain a weakly predicted PTS1 signal, consistent with a glycosomal localization (see  
718 PPase in Fig. S2.5.1). Homologs of the *T. brucei* acidocalcisomal IP<sub>3</sub> receptor, the  
719 vacuolar transporter chaperone 1/4, the zinc transporter and the acid phosphatase  
720 could not be detected in the *Perkinsela* sp. genome. Furthermore, *Perkinsela* sp.  
721 appears to lack clear homologs of the AP-3 complex subunits, which in *T. brucei* are  
722 involved in acidocalcisome biogenesis. However, *Perkinsela* sp. seems to contain  
723 homologs of AP-1, AP-2 and AP-4 complexes, which are known to be involved in  
724 sorting to the endosomal compartment, the formation of endocytic vesicles at the  
725 plasma membrane, and vesicular traffic to the endosomal/lysosomal system,  
726 respectively (Fig. S3.13.1). While it is unclear whether acidocalcisome generation is  
727 facilitated by some of these AP-complex subunits, our analyses support the existence of  
728 a basic acidocalcisome in *Perkinsela* sp. that could be involved in phosphate storage  
729 and osmoregulation. Recent work on the role of the *T. brucei* acidocalcisome in  
730 autophagy<sup>48</sup> suggests that the apparent lack of classical autophagy and  
731 endosomal/lysosomal systems in *Perkinsela* sp. might be compensated for by the  
732 presence of an acidocalcisome (see below).

733

### 734 **3.14 Endocytosis and Endosymbiont-Host Metabolic Integration**

735 Our discovery of a glycosome in the highly reduced cytoplasm of *Perkinsela* sp. (Fig.  
736 S2.5.1), as exists in other kinetoplastids and the deep branching diplomonads,  
737 underscores the importance of the organelle to the biochemistry and metabolism of  
738 these unusual protists. The strongest evidence for the existence of a glycosome /  
739 peroxisome-like organelle in *Perkinsela* sp. comes from the identification of a near-

740 complete set of peroxin genes in the nuclear genome, as well as the fact that a  
741 significant part of the glycolytic pathway appears to be organelle-targeted. While the  
742 mechanism(s) for glycosomal membrane protein targeting could not be inferred (Pex3,  
743 Pex16, Pex19 protein genes were not found), it is worth noting that a Pex3 homolog is  
744 also missing in *T. brucei*, where the receptor, Pex19, is nevertheless present and Pex16  
745 was recently identified<sup>49</sup>. In *Trypanosoma*, the Pex16 protein also seems to play a role  
746 in glycosome biogenesis, making its apparent absence in *Perkinsela* sp. somewhat  
747 perplexing. However, numerous other proteins involved in glycosome biogenesis are  
748 encoded in the *Perkinsela* sp. genome, and collectively the evidence for a glycosome /  
749 peroxisome-like organelle in *Perkinsela* sp. is robust. Here we discuss how the  
750 *Perkinsela* sp. glycosome might interact with other single-membrane bound organelles  
751 in the cell and, more generally, serve as a link between the metabolisms of the  
752 endosymbiont and its amoebozoan host.

753         As *Perkinsela* sp. apparently uses endocytosis to internalize material from the  
754 cytoplasm of *P. pemaquidensis* (Fig. 1 and Fig. S2.6.1), it is worth considering the fate  
755 and significance of the ingested materials / metabolites. The textbook endocytic  
756 pathway involves the fusion of plasma membrane-derived vesicles with early  
757 endosomes generated from the trans-Golgi network, which then mature to late  
758 endosomes and lysosomes, where digestion ultimately takes place. As mentioned  
759 above, it is unclear whether *Perkinsela* sp. cells are actually capable of endosome  
760 formation. Several observations, including the retention of a highly reduced set of Rab  
761 proteins (only Rab1 and Rab2), the apparent lack of an ESCRT system and, if present  
762 at all, a highly reduced / peculiar Golgi apparatus, make the presence of a classical  
763 endosomal / lysosomal pathway in *Perkinsela* sp. unlikely.

764         If there are no endosomes in *Perkinsela* sp., where might endocytic vesicles go?  
765 One intriguing possibility is that they fuse with the putative glycosome / peroxisome-like  
766 organelle. The glycosome is predicted to be rich in metabolic capacity, especially  
767 relative to the modest overall metabolic potential of this reduced obligate endosymbiont.  
768 The *Perkinsela* sp. glycosome is predicted to harbor various glycolytic enzymes, as well  
769 as enzymes involved in the metabolism of nucleotides, mevalonate and amino acids  
770 (Fig. S2.5.1). Fusion of endocytic vesicles with glycosomes would allow metabolites

771 derived from the amoeba cytoplasm to feed directly into the biochemical pathways of  
772 *Perkinsela* sp. Consistent with this hypothesis is the close association of, and perhaps  
773 fusion of, vesicles of differing electron densities within the *Perkinsela* sp. cytoplasm  
774 (Fig. 1, Fig. S2.6.1). Plasma membrane-derived vesicles could also fuse directly with  
775 acidocalcisomes (lysosome-related organelles), which could perform at least some of  
776 the degradative functions in the *Perkinsela* sp. cell. As noted above, however,  
777 *Perkinsela* sp. appears to have lost most of the classical lysosomal lytic enzymes  
778 presumed to have been present in its free-living ancestors, including several peptidases  
779 and glucosidases. The precise role(s) of an acidocalcisome-like organelle in *Perkinsela*  
780 sp. is at present unclear.

781 Another possibility is that glycosomes and acidocalcisomes represent different  
782 stages in the endocytic / digestive pathway in *Perkinsela* sp. Under this scenario,  
783 endocytic vesicles would first fuse with glycosomes, where ingested material is first  
784 metabolized. These compartments could then mature into acidocalcisomes, or,  
785 alternatively, fuse with preexisting acidocalcisomes. In this case, very little in the way of  
786 peroxisomal membrane (metabolite) transporters would be necessary in the glycosomal  
787 membranes, as they could be recycled from the acidocalcisomal membranes at the time  
788 of fusion; this could explain the apparent lack of Pex16 and Pex19 homologs in  
789 *Perkinsela* sp. At the same time, pexophagy would be unnecessary, as glycosomes  
790 would 'disappear' as part of the maturation / fusion process. In support of this fusion /  
791 maturation hypothesis is the presence of SAH and PPase in *Perkinsela* sp., enzymes  
792 which in *Trypanosoma* are localized to the reservosome and acidocalcisome,  
793 respectively, and possess putative PTS1 targeting signals (SAH and PPase are some of  
794 the few reservosome / acidocalcisome enzymes that could be detected in *Perkinsela*  
795 sp.; Table S2.5.2). The PTS1 targeting predictions are admittedly weak; it is unclear  
796 whether these proteins are indeed targeted to the *Perkinsela* sp. glycosome or some  
797 derivation of it. Regardless, the *Perkinsela* sp. glycosome appears to have evolved in  
798 concert with the organism's intimate and obligate association with its amoeba host.

799  
800  
801

802 **References for Supplementary Notes**

803

- 804 1 El-Sayed, N. M. *et al.* Comparative genomics of trypanosomatid parasitic  
805 protozoa. *Science* **309**, 404-409 (2005).
- 806 2 Stuart, K. D. & Myler, P. J. in *Genomics and evolution of microbial eukaryotes*  
807 (eds L. A. Katz & D. Bhattacharya) Ch. 10, 155-168 (Oxford University Press.,  
808 2006).
- 809 3 Jackson, A. P. *et al.* Kinetoplastid phylogenomics reveals the evolutionary  
810 innovations associated with the origins of parasitism. *Current Biology* **26**, 161-  
811 172, doi:10.1016/j.cub.2015.11.055 (2016).
- 812 4 Bringaud, F., Ghedin, E., El-Sayed, N. M. & Papadopoulou, B. Role of  
813 transposable elements in trypanosomatids. *Microbes and Infectivity* **10**, 575-581,  
814 doi:10.1016/j.micinf.2008.02.009 (2008).
- 815 5 Jackson, A. P., Quail, M. A. & Berriman, M. Insights into the genome sequence  
816 of a free-living Kinetoplastid: *Bodo saltans* (Kinetoplastida: Euglenozoa). *BMC*  
817 *Genomics* **9**, 594, doi:10.1186/1471-2164-9-594 (2008).
- 818 6 El-Sayed, N. M. *et al.* The genome sequence of *Trypanosoma cruzi*, etiologic  
819 agent of Chagas disease. *Science* **309**, 409-415 (2005).
- 820 7 Smith, M., Bringaud, F. & Papadopoulou, B. Organization and evolution of two  
821 SIDER retroposon subfamilies and their impact on the *Leishmania* genome. *BMC*  
822 *Genomics* **10**, 240, doi:10.1186/1471-2164-10-240 (2009).
- 823 8 Tanifuji, G. *et al.* Genomic characterization of *Neoparamoeba pemaquidensis*  
824 (Amoebozoa) and its kinetoplastid endosymbiont. *Eukaryotic Cell* **10**, 1143-1146,  
825 doi:10.1128/EC.05027-11 (2011).
- 826 9 Aksoy, S., Williams, S., Chang, S. & Richards, F. F. SLACS retrotransposon from  
827 *Trypanosoma brucei* gambiense is similar to mammalian LINEs. *Nucleic Acids*  
828 *Research* **18**, 785-792 (1990).
- 829 10 Patrick, K. L. *et al.* Genomic rearrangements and transcriptional analysis of the  
830 spliced leader-associated retrotransposon in RNA interference-deficient  
831 *Trypanosoma brucei*. *Molecular Microbiology* **67**, 435-447, doi:10.1111/j.1365-  
832 2958.2007.06057.x (2008).
- 833 11 Pombert, J. F. *et al.* The complete mitochondrial genome from an unidentified  
834 *Phalansterium* species. *Protist Genomics* **2**, 25-32. (2014).
- 835 12 David, V. *et al.* Gene loss and error-prone RNA editing in the mitochondrion of  
836 *Perkinsela*, an endosymbiotic kinetoplastid. *mBio* **6**, e01498-01415 (2015).
- 837 13 Dobakova, E., Flegontov, P., Skalicky, T. & Lukeš, J. Unexpectedly streamlined  
838 mitochondrial genome of the euglenozoan *Euglena gracilis*. *Genome biology and*  
839 *evolution* **7**, 3358-3367, doi:10.1093/gbe/evv229 (2015).
- 840 14 Flegontov, P. *et al.* Divergent mitochondrial respiratory chains in phototrophic  
841 relatives of apicomplexan parasites. *Molecular Biology & Evolution* **32**, 1115-  
842 1131, doi:10.1093/molbev/msv021 (2015).
- 843 15 Nash, E. A., Nisbet, R. E., Barbrook, A. C. & Howe, C. J. Dinoflagellates: a  
844 mitochondrial genome all at sea. *Trends in Genetics* **24**, 328-335 (2008).

- 845 16 Zara, V. *et al.* Biogenesis of yeast dicarboxylate carrier: the carrier signature  
846 facilitates translocation across the mitochondrial outer membrane. *Journal of Cell*  
847 *Science* **120**, 4099-4106, doi:10.1242/jcs.018929 (2007).
- 848 17 Dyková, I., Fiala, I., Lom, J. & Lukeš, J. *Perkinsiella amoebae*-like  
849 endosymbionts of *Neoparamoeba* spp., relatives of the kinetoplastid  
850 *Ichthyobodo*. *European Journal of Protistology* **39**, 37-52 (2003).
- 851 18 Dyková, I. *et al.* *Neoparamoeba branchiphila* n. sp., and related species of the  
852 genus *Neoparamoeba* Page, 1987: morphological and molecular characterization  
853 of selected strains. *Journal of Fish Diseases* **28**, 49-64, doi:10.1111/j.1365-  
854 2761.2004.00600.x (2005).
- 855 19 Barbrook, A. C., Howe, C. J. & Purton, S. Why are plastid genomes retained in  
856 non-photosynthetic organisms? *Trends in Plant Science* **11**, 101-108 (2006).
- 857 20 Smith, D. R., Crosby, K. & Lee, R. W. Correlation between nuclear plastid DNA  
858 abundance and plastid number supports the limited transfer window hypothesis.  
859 *Genome Biology and Evolution* **3**, 365-371, doi:10.1093/gbe/evr001 (2011).
- 860 21 Butter, F. *et al.* Comparative proteomics of two life cycle stages of stable isotope-  
861 labeled *Trypanosoma brucei* reveals novel components of the parasite's host  
862 adaptation machinery. *Molecular and Cellular Proteomics* **12**, 172-179,  
863 doi:10.1074/mcp.M112.019224 (2013).
- 864 22 Gunasekera, K., Wuthrich, D., Braga-Lagache, S., Heller, M. & Ochsenreiter, T.  
865 Proteome remodelling during development from blood to insect-form  
866 *Trypanosoma brucei* quantified by SILAC and mass spectrometry. *BMC*  
867 *Genomics* **13**, 556, doi:10.1186/1471-2164-13-556 (2012).
- 868 23 Niemann, M. *et al.* Mitochondrial outer membrane proteome of *Trypanosoma*  
869 *brucei* reveals novel factors required to maintain mitochondrial morphology.  
870 *Molecular and Cellular Proteomics* **12**, 515-528, doi:10.1074/mcp.M112.023093  
871 (2013).
- 872 24 Urbaniak, M. D., Guther, M. L. & Ferguson, M. A. Comparative SILAC proteomic  
873 analysis of *Trypanosoma brucei* bloodstream and procyclic lifecycle stages.  
874 *PLoS one* **7**, e36619, doi:10.1371/journal.pone.0036619 (2012).
- 875 25 Dean, S., Moreira-Leite, F., Varga, V. & Gull, K. Cilium transition zone proteome  
876 reveals compartmentalization and differential dynamics of ciliopathy complexes.  
877 *Proceedings of the National Academy of Sciences USA* **113**, E5135-5143,  
878 doi:10.1073/pnas.1604258113 (2016).
- 879 26 Bonhivers, M., Nowacki, S., Landrein, N. & Robinson, D. R. Biogenesis of the  
880 trypanosome endo-exocytotic organelle is cytoskeleton mediated. *PLoS Biology*  
881 **6**, e105, doi:10.1371/journal.pbio.0060105 (2008).
- 882 27 Morriswood, B. *et al.* Novel bilobe components in *Trypanosoma brucei* identified  
883 using proximity-dependent biotinylation. *Eukaryotic Cell* **12**, 356-367,  
884 doi:10.1128/EC.00326-12 (2013).
- 885 28 Sunter, J. D., Varga, V., Dean, S. & Gull, K. A dynamic coordination of flagellum  
886 and cytoplasmic cytoskeleton assembly specifies cell morphogenesis in  
887 trypanosomes. *Journal of Cell Science* **128**, 1580-1594, doi:10.1242/jcs.166447  
888 (2015).



- 889 29 Broadhead, R. *et al.* Flagellar motility is required for the viability of the  
890 bloodstream trypanosome. *Nature* **440**, 224-227, doi:10.1038/nature04541  
891 (2006).
- 892 30 Hart, S. R. *et al.* Analysis of the trypanosome flagellar proteome using a  
893 combined electron transfer/collisionally activated dissociation strategy. *Journal of*  
894 *the American Society for Mass Spectrometry* **20**, 167-175,  
895 doi:10.1016/j.jasms.2008.08.014 (2009).
- 896 31 Hodges, M. E., Scheumann, N., Wickstead, B., Langdale, J. A. & Gull, K.  
897 Reconstructing the evolutionary history of the centriole from protein components.  
898 *Journal of Cell Science* **123**, 1407-1413, doi:10.1242/jcs.064873 (2010).
- 899 32 Povelones, M. L. Beyond replication: division and segregation of mitochondrial  
900 DNA in kinetoplastids. *Molecular and Biochemical Parasitology* **196**, 53-60,  
901 doi:10.1016/j.molbiopara.2014.03.008 (2014).
- 902 33 Trikin, R. *et al.* TAC102 Is a novel component of the mitochondrial genome  
903 segregation machinery in trypanosomes. *PLoS Pathology* **12**, e1005586,  
904 doi:10.1371/journal.ppat.1005586 (2016).
- 905 34 Schnarwiler, F. *et al.* Trypanosomal TAC40 constitutes a novel subclass of  
906 mitochondrial beta-barrel proteins specialized in mitochondrial genome  
907 inheritance. *Proceedings of the National Academy of Sciences USA* **111**, 7624-  
908 7629, doi:10.1073/pnas.1404854111 (2014).
- 909 35 Zhao, Z., Lindsay, M. E., Roy Chowdhury, A., Robinson, D. R. & Englund, P. T.  
910 p166, a link between the trypanosome mitochondrial DNA and flagellum,  
911 mediates genome segregation. *EMBO Journal* **27**, 143-154,  
912 doi:10.1038/sj.emboj.7601956 (2008).
- 913 36 Gheiratmand, L., Brasseur, A., Zhou, Q. & He, C. Y. Biochemical characterization  
914 of the bi-lobe reveals a continuous structural network linking the bi-lobe to other  
915 single-copied organelles in *Trypanosoma brucei*. *The Journal of Biological*  
916 *Chemistry* **288**, 3489-3499, doi:10.1074/jbc.M112.417428 (2013).
- 917 37 Akiyoshi, B. & Gull, K. Discovery of unconventional kinetochores in  
918 kinetoplastids. *Cell* **156**, 1247-1258, doi:10.1016/j.cell.2014.01.049 (2014).
- 919 38 Jamdhade, M. D. *et al.* Comprehensive proteomics analysis of glycosomes from  
920 *Leishmania donovani*. *OMICS* **19**, 157-170, doi:10.1089/omi.2014.0163 (2015).
- 921 39 Emms, D. M. & Kelly, S. OrthoFinder: solving fundamental biases in whole  
922 genome comparisons dramatically improves orthogroup inference accuracy.  
923 *Genome Biology* **16**, 157, doi:10.1186/s13059-015-0721-2 (2015).
- 924 40 Field, M. C. & Carrington, M. The trypanosome flagellar pocket. *Nature Reviews*  
925 *Microbiology* **7**, 775-786, doi:10.1038/nrmicro2221 (2009).
- 926 41 Perkins, F. O. & Castagna, M. Ultrastructure of the Nebenkörper or 'secondary  
927 nucleus' of the parasitic amoeba *Paramoeba pernicioso* (Amoebida,  
928 Paramoebidae). *Journal of Invertebrate Pathology* **17**, 186-193 (1971).
- 929 42 Ren, Q., Chen, K. & Paulsen, I. T. TransportDB: a comprehensive database  
930 resource for cytoplasmic membrane transport systems and outer membrane  
931 channels. *Nucleic Acids Research* **35**, D274-279, doi:10.1093/nar/gkl925 (2007).
- 932 43 Yamada, T., Letunic, I., Okuda, S., Kanehisa, M. & Bork, P. iPath2.0: interactive  
933 pathway explorer. *Nucleic Acids Research* **39**, W412-415,  
934 doi:10.1093/nar/gkr313 (2011).

- 935 44 Santos, R. F. *et al.* Influence of ecto-nucleoside triphosphate  
936 diphosphohydrolase activity on *Trypanosoma cruzi* infectivity and virulence.  
937 *PLoS Neglected Tropical Diseases* **3**, e387, doi:10.1371/journal.pntd.0000387  
938 (2009).
- 939 45 Herman, M., Gillies, S., Michels, P. A. & Rigden, D. J. Autophagy and related  
940 processes in trypanosomatids: insights from genomic and bioinformatic analyses.  
941 *Autophagy* **2**, 107-118 (2006).
- 942 46 Sant'Anna, C. *et al.* Subcellular proteomics of *Trypanosoma cruzi* reservosomes.  
943 *Proteomics* **9**, 1782-1794, doi:10.1002/pmic.200800730 (2009).
- 944 47 Huang, G. *et al.* Proteomic analysis of the acidocalcisome, an organelle  
945 conserved from bacteria to human cells. *PLoS Pathogens* **10**, e1004555,  
946 doi:10.1371/journal.ppat.1004555 (2014).
- 947 48 Li, F. J. & He, C. Y. Acidocalcisome is required for autophagy in *Trypanosoma*  
948 *brucei*. *Autophagy* **10**, 1978-1988, doi:10.4161/auto.36183 (2014).
- 949 49 Kalel, V. C., Schliebs, W. & Erdmann, R. Identification and functional  
950 characterization of *Trypanosoma brucei* peroxin 16. *Biochimica et Biophysica*  
951 *Acta* **1853**, 2326-2337, doi:10.1016/j.bbamcr.2015.05.024 (2015).
- 952 50 Guther, M. L., Urbaniak, M. D., Tavendale, A., Prescott, A. & Ferguson, M. A.  
953 High-confidence glycosome proteome for procyclic form *Trypanosoma brucei* by  
954 epitope-tag organelle enrichment and SILAC proteomics. *Journal of Proteome*  
955 *Research* **13**, 2796-2806, doi:10.1021/pr401209w (2014).
- 956 51 Kanehisa, M., Sato, Y., Kawashima, M., Furumichi, M. & Tanabe, M. KEGG as a  
957 reference resource for gene and protein annotation. *Nucleic Acids Research* **44**,  
958 D457- 462, doi:10.1093/nar/gkv1070 (2016).

959

## 960 **Supplementary Figure Legends**

961

962 **Fig. S1.1.** Strand polarity in the *Perkinsela* sp. nuclear genome. **(a)** A 48 Kb region of  
963 scaffold 4 (positions 187,000-234,899); **(b)** a 130 Kb region of scaffold 1 (147,000-  
964 277,00); **(c)** a 131 Kb region of scaffold 9 (3,000-134,167). Each rectangle represents a  
965 single gene. Genes on the forward strand are on the top of each panel (oriented left to  
966 right), genes on the bottom are on the bottom (right to left). Blocks of genes on each  
967 scaffold are highlighted. **(d)** Intergenic spacer sizes between gene blocks calculated  
968 using four different minimum block sizes. Divergent gene blocks are those whose  
969 transcription is oriented away from each other (i.e., on '-' and '+' strands), convergent  
970 gene blocks ('+ -') point towards each another.

971

972 **Fig. S1.5.1.** Mitochondrial genome of *Paramoeba pemaquidensis* CCAP 1560/4. The  
973 genome is a circular mapping molecule 48,522 bp in size. All genes are on the same

974 strand, with the exception of a single tRNA gene (tRNA-Ala). The gray inner graph  
975 shows G/C content across the genome; the middle line showing 50% G/C. Genes are  
976 color-coded according to the predicted functional categories shown in the lower left.

977  
978 **Fig. S1.6.1a-h.** Maximum likelihood phylogenetic trees of candidate genes / proteins  
979 derived by endosymbiotic gene transfer (EGT). Proteins encoded by genes found in the  
980 *Paramoeba pemaquidensis* (host) nuclear genome are highlighted by orange boxes,  
981 while homologs in the nuclear genome of the endosymbiont *Perkinsela* sp. (when  
982 present) are highlighted by blue boxes. Other amoebozoan and kinetoplastid sequences  
983 are highlighted with orange and blue text, respectively. RAxML Bootstrap values (100  
984 replicates) are shown where  $\geq 50\%$ . Thick lines indicate Bayesian posterior probabilities  
985  $\geq 0.95$ . Scale bars show inferred number of amino acid substitutions per site.

986  
987 **Fig. S1.6.2.** Phylogenomics pipeline for investigating endosymbiotic gene transfer  
988 (EGT). See supplemental text for details.

989  
990 **Fig. S1.6.3.** Mitochondrial carrier signature sequences in *Paramoeba pemaquidensis*  
991 proteins derived by endosymbiotic gene transfer (EGT). **(a)** Alignment of a putative  
992 mitochondrial ADP/ATP translocase protein encoded in the *P. pemaquidensis* nuclear  
993 genome with two homologs found in *Perkinsela* sp. These sequences possess amino  
994 acid sequence motifs like mitochondrial carrier signature sequences found in other  
995 organisms (PX[D/E]XX[K/R]). **(b)** Alignment of two EGT-derived mitochondrial carrier  
996 proteins in *P. pemaquidensis* with a homolog in *Perkinsela* sp. These proteins also  
997 contain mitochondrial carrier signatures. Protein IDs are provided for each sequence.

998  
999 **Fig. S1.7.1.** Mitochondrial proteome of *Perkinsela* sp. (a) Venn diagram showing the  
1000 number of mitochondrial proteins predicted using TargetP, Predotar, and PredSL  
1001 targeting peptide prediction tools. (b) Histogram showing the functional diversity of  
1002 putative mitochondrial proteins identified based solely on N-terminal prediction tools and  
1003 using an HMMER-based procedure guided by experimentally determined mitochondrial  
1004 proteins in *Trypanosoma brucei brucei* TREU 927. The histogram shows only the

1005 results of 107 proteins falling into prominent functional categories (minor /  
1006 miscellaneous categories are not shown).

1007

1008 **Fig. S2.5.1.** Predicted metabolic map of the *Perkinsela* sp. glycosome-like organelle  
1009 and associated pathways. In addition to the ability to import cytosolic proteins via a  
1010 peroxin-based translocation machinery, the putative *Perkinsela* sp. glycosome is  
1011 predicted to contain enzymes for glycolysis, various carbohydrate-metabolizing  
1012 enzymes, as well as enzymes involved in nucleotide and amino acid metabolism. The  
1013 *Perkinsela* sp. glycosome appears to lack conserved peroxisomal functions for fatty acid  
1014 oxidation and detoxification of reactive oxygen species. Protein names in green indicate  
1015 *Perkinsela* sp. components strongly predicted to be glycosome-targeted and with  
1016 homologs in the *Trypanosoma brucei* glycosome<sup>50</sup>. Proteins in red are those known  
1017 from other kinetoplastids to be potentially glycosome-targeted, but where evidence for  
1018 targeting in *Perkinsela* sp. is lacking. Enzymes in gray are proteins that have thus far  
1019 not been reported to be glycosome-localized in other organisms, as well as proteins  
1020 with unknown function (UKFs). Superscripted numbers indicate presence of a predicted  
1021 peroxisomal targeting signal 1 (1: PTS1) or 2 (2: PTS2). If the protein name/number is  
1022 followed by a bracketed question mark (?), the targeting prediction is unclear. In cases  
1023 where the protein name is followed by a question mark without brackets, the presence  
1024 of the protein in *Perkinsela* sp. is unclear. Arrows show the direction of enzyme-  
1025 catalyzed reactions and metabolite transport. Dashed lines or dashed arrows (black:  
1026 very likely, gray: possible) represent putative transport routes without clear evidence for  
1027 the presence of specific membrane translocators. For abbreviations of the protein  
1028 names, see Table S2.5.2, which contains a detailed list of all putative glycosome-  
1029 localized proteins, as well as proteins potentially connected to glycosome-associated  
1030 metabolic pathways. Additional abbreviations: DUF: domain of unknown function,  
1031 DHAP: dihydroxyacetone phosphate, PEP: phosphoenolpyruvate, Pyr: pyruvate, OXA:  
1032 oxaloacetate, MAL: malate, FUM: fumarate, SUC: succinate, IMP: inosine  
1033 monophosphate, SAM: S-Adenosyl methionine, SAH: -Adenosyl-L-homocysteine,  
1034 HMGCoA: 3-hydroxy-3-methyl-glutaryl-coenzyme A, Mev: mevalonate.

1035

1036 **Fig. S2.6.1.** Transmission electron micrographs of the amoebozoan *Paramoeba*  
1037 *pemaquidensis* CCAP 1560/4 and its kinetoplastid endosymbiont *Perkinsela* sp. **a.**  
1038 Subcellular features of *P. pemaquidensis*, with the amoeba host nucleus (NP), host  
1039 mitochondria (M), and nucleus-associated *Perkinsela* sp. endosymbiont (En)  
1040 highlighted. Panel **a1** shows higher magnification of the host mitochondria with  
1041 branched tubular cristae. Panel **a2** shows a putative endocytotic vesicle (Ve) within the  
1042 endosymbiont, with what appears to be a single membrane (white arrow) and an inner  
1043 glycoprotein surface (black arrow). For reference, the arrowhead points to the double  
1044 membrane surrounding a nearby mitochondrion in the amoeba cytoplasm. Panel **a3**  
1045 shows a higher magnification of the host nuclear envelope (Nm), while Panel **a4**  
1046 highlights the plasma membrane of *P. pemaquidensis* with thin amorphous glycocalyx.  
1047 **b.** Cross section showing microtubules (Mt) beneath the plasma membrane (black  
1048 arrowhead) of the endosymbiont *Perkinsela* sp. The endosymbiont cytoplasm and host  
1049 amoeba cytoplasm are labelled EnC and PaC, respectively. **c.** Longitudinal section of  
1050 *Perkinsela* sp. microtubules (white arrows). Panel-specific scale bars are provided.

1051  
1052 **Fig. S2.7.1.** Workflow for the identification of transporter protein genes in the *Perkinsela*  
1053 sp. and *Paramoeba pemaquidensis* nuclear genomes.

1054  
1055 **Fig. S2.7.2.** Classification of *Perkinsela* sp. transporter proteins and those of select  
1056 organisms using TransportDB. *Perkinsela* sp. (red) was compared to *Leishmania major*  
1057 Friedlin (black), *Trypanosoma brucei brucei* TREU927/4 GUTat10.2 (light blue), and  
1058 *Trypanosoma cruzi* CL Brener TC3 (light red). (A) The percentage of predicted  
1059 transporter proteins encoded by the *Perkinsela* sp. genome relative to the total number  
1060 of protein-coding genes, compared to the same metric for other kinetoplastids.  
1061 Transporters were first split into the following superfamilies: ATP-dependent, Ion  
1062 Channels, Secondary transporters, and Unclassified. Each superfamily was then broken  
1063 down into families. (B) Unclassified superfamily, (C) Secondary transporter superfamily,  
1064 (D) Ion channels superfamily, (E) ATP-dependent superfamily.

1065

1066 **Fig. S2.7.3.** Workflow for prediction and analysis of *Perkinsela* sp. secreted proteins. (1)  
1067 Proteins secreted into the host cytosol, (2) proteins present in the plasma membrane  
1068 (with transmembrane domain) and (3) proteins present in the plasma membrane (with  
1069 GPI anchor).

1070  
1071 **Fig. S2.8.1.** KEGG pathway<sup>51</sup> showing cell cycle-associated proteins. Proteins present  
1072 in both *Perkinsela* sp. (endosymbiont) and *Paramoeba pemaquidensis* (host) are  
1073 highlighted blue, those only in *P. pemaquidensis* are shown in red, and those only in  
1074 *Perkinsela* sp. are in green.

1075  
1076  
1077 **Fig. S3.1.1a.** KEGG pathway<sup>51</sup> showing glutathione / trypanothione metabolism.  
1078 Proteins with clear homologs in the endosymbiont *Perkinsela* sp. are highlighted green,  
1079 while those encoded in the nuclear genome of *Paramoeba pemaquidensis* are  
1080 highlighted red. Green text corresponds to gene / enzyme names in bacteria.

1081  
1082 **Fig. S3.1.1b.** KEGG pathway<sup>51</sup> showing ubiquinone / terpenoid-quinone metabolism.  
1083 Proteins with clear homologs in the endosymbiont *Perkinsela* sp. are highlighted green,  
1084 while those encoded in the nuclear genome of *Paramoeba pemaquidensis* are  
1085 highlighted red. Green text corresponds to gene / enzyme names in bacteria.

1086  
1087 **Fig. S3.1.1c.** KEGG pathway<sup>51</sup> showing arginine and proline metabolism. Proteins with  
1088 clear homologs in the endosymbiont *Perkinsela* sp. are highlighted green, while those  
1089 encoded in the nuclear genome of *Paramoeba pemaquidensis* are highlighted red.

1090  
1091 **Fig. S3.1.1d.** KEGG pathway<sup>51</sup> showing fatty acid metabolism. Proteins with clear  
1092 homologs in the endosymbiont *Perkinsela* sp. are highlighted green, while those  
1093 encoded in the nuclear genome of *Paramoeba pemaquidensis* are highlighted red.

1094  
1095 **Fig. S3.1.1e.** KEGG pathway<sup>51</sup> showing purine metabolism. Proteins with clear  
1096 homologs in the endosymbiont *Perkinsela* sp. are highlighted green, while those

1097 encoded in the nuclear genome of *Paramoeba pemaquidensis* are highlighted red.  
1098 Green text corresponds to gene / enzyme names in bacteria.

1099

1100 **Fig. S3.1.1f.** KEGG pathway<sup>51</sup> showing terpenoid biosynthesis. Proteins with clear  
1101 homologs in the endosymbiont *Perkinsela* sp. are highlighted green, while those  
1102 encoded in the nuclear genome of *Paramoeba pemaquidensis* are highlighted red.

1103

1104 **Fig. S3.1.1g.** KEGG pathway<sup>51</sup> showing the citrate cycle (tricarboxylic acid cycle).  
1105 Proteins with clear homologs in the endosymbiont *Perkinsela* sp. are highlighted green,  
1106 while those encoded in the nuclear genome of *Paramoeba pemaquidensis* are  
1107 highlighted red.

1108

1109 **Fig. S3.11.1.** KEGG pathway<sup>51</sup> showing autophagy proteins. Proteins with clear  
1110 homologs identified in the nuclear genome of *Paramoeba pemaquidensis* are  
1111 highlighted red. No autophagy-associated proteins were identified in the nuclear  
1112 genome of *Perkinsela* sp.

1113

1114 **Fig. S3.12.1.** KEGG pathway<sup>51</sup> showing endocytosis-associated proteins. Proteins with  
1115 clear homologs in *Perkinsela* sp. are highlighted green, while those found in the nuclear  
1116 genome of *Paramoeba pemaquidensis* are shown in red.

1117

1118 **Fig. S3.13.1.** KEGG pathway<sup>51</sup> showing lysosome-associated proteins. Proteins with  
1119 clear homologs in the endosymbiont *Perkinsela* sp. are highlighted green, while those  
1120 encoded in the nuclear genome of *Paramoeba pemaquidensis* are highlighted red.

1121

1122 **Fig. S4.** Density gradient centrifugation and quantification of total DNA fractions isolated  
1123 from *Paramoeba pemaquidensis* CCAP 1560/4 and its endosymbiont *Perkinsela* sp. **(a)**  
1124 UV light exposure of Hoechst dye-cesium chloride density gradient centrifugation tube  
1125 after ultracentrifugation at 40,000 g for 67 hours. **(b-d)** Ethidium bromide stained  
1126 agarose gel electrophoresis of semi-quantitative PCR amplicons generated using  
1127 genome-specific primers and DNA from the three fractions shown in (a). **(e)** PCR

1128 amplification of four different concentrations of plasmid DNA used as a standard.  
1129 Abbreviations: M= host mitochondrion (*cox1* gene), IRE=*Perkinsela* sp. (*Ichthyobodo*-  
1130 related endosymbiont) (*rpb1* gene), host=*Paramoeba pemaquidensis* (*rpb1* gene).

1131  
1132 **Fig. S5.** RNA-seq-based *in silico* profiling of genomic scaffolds from *Paramoeba*  
1133 *pemaquidensis* CCAP 1560/4 and its endosymbiont *Perkinsela* sp. RNA-seq reads from  
1134 the spliced leader (SL)-amplified RNA-seq library were mapped to each of the genomic  
1135 scaffolds, as were the RNA-seq reads derived from the total RNA library. A SL RNA /  
1136 total RNA ratio was then calculated for each scaffold based on the total number of  
1137 mapped RNA-seq reads from each library. **(a)** For each scaffold, the SL RNA / total  
1138 RNA ratio was plotted against scaffold sequence depth coverage. **(b)** Plot showing SL  
1139 RNA / total RNA ratio relative to scaffold G/C content. Colored shapes correspond to  
1140 scaffolds flagged as being of endosymbiont nuclear, host nuclear, bacterial or kDNA  
1141 origin (including, but not limited to, phylogenetic analyses carried out by David et al.<sup>12</sup>).  
1142 Note that these analyses were not seen as definitive, but simply a preliminary  
1143 assessment of the characteristics defining scaffolds of different genomic origins.

1144  
1145 **Fig. S6.** Summary of bioinformatics pipeline used to investigate peroxisome- /  
1146 glycosome-associated proteins in *Perkinsela* sp. and its host, *Paramoeba*  
1147 *pemaquidensis*.

1148  
1149



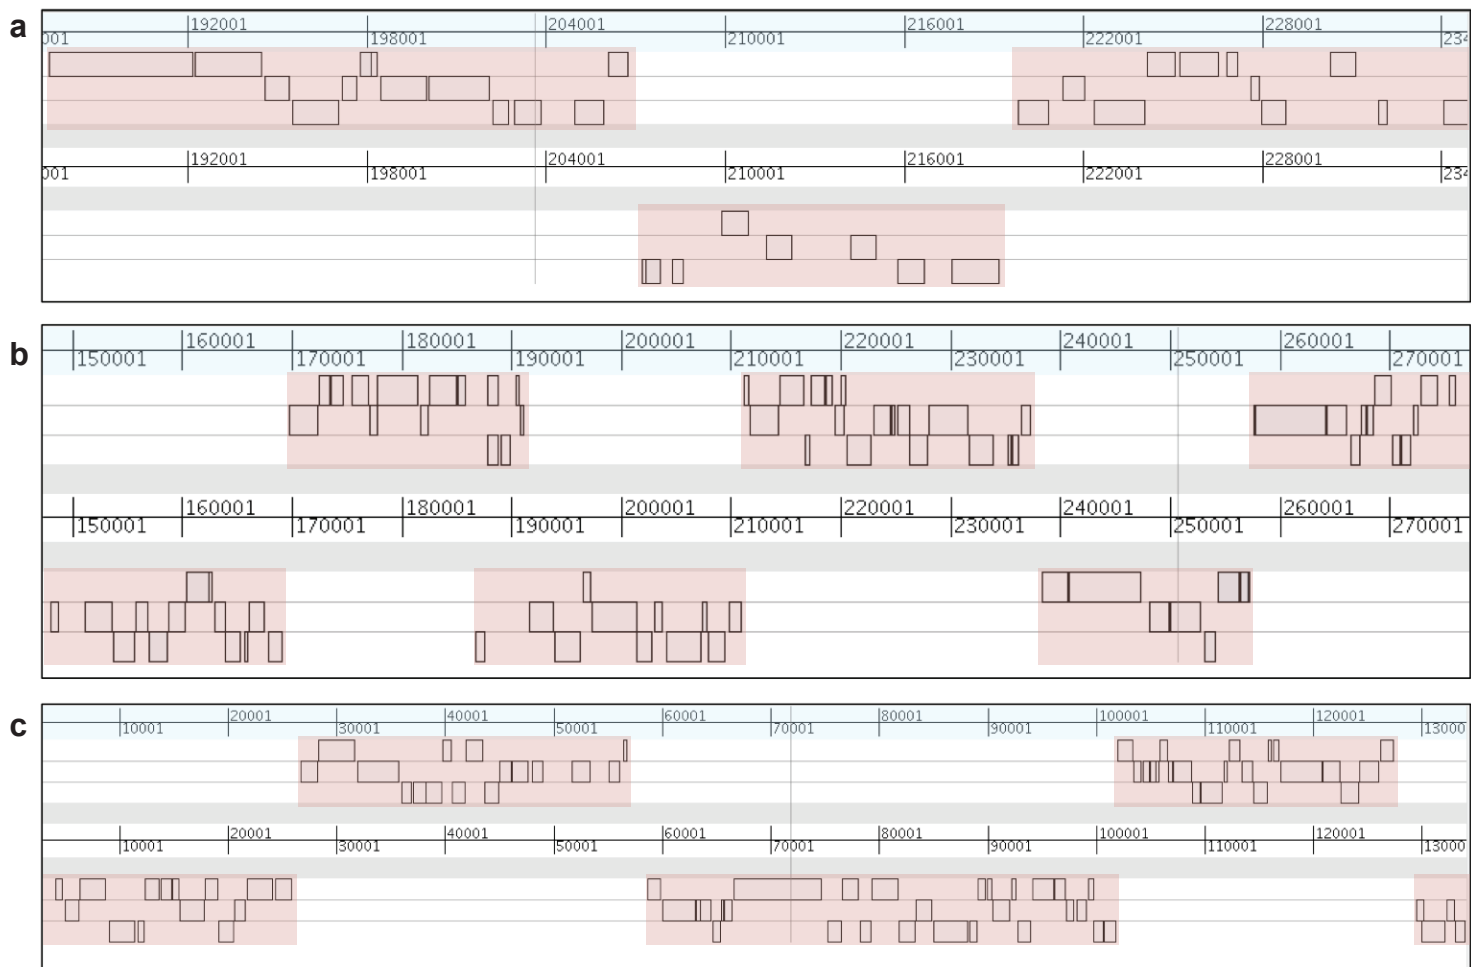

**Minimum gene block size**

| <b>d</b>                | <b>≥1</b> | <b>≥2</b> | <b>≥3</b> | <b>≥4</b> |
|-------------------------|-----------|-----------|-----------|-----------|
| <b>Divergent (- +)</b>  | 738 bp    | 707 bp    | 665 bp    | 671 bp    |
| <b>Convergent (+ -)</b> | 1,218 bp  | 1,302 bp  | 1,372 bp  | 1,381 bp  |

**Fig. S1.1.** Strand polarity in the *Perkinsela* sp. nuclear genome.



**a** Tree ID: 8307  
 Query protein: NPAc7281A  
 Putative function: Peptidase M20 protein

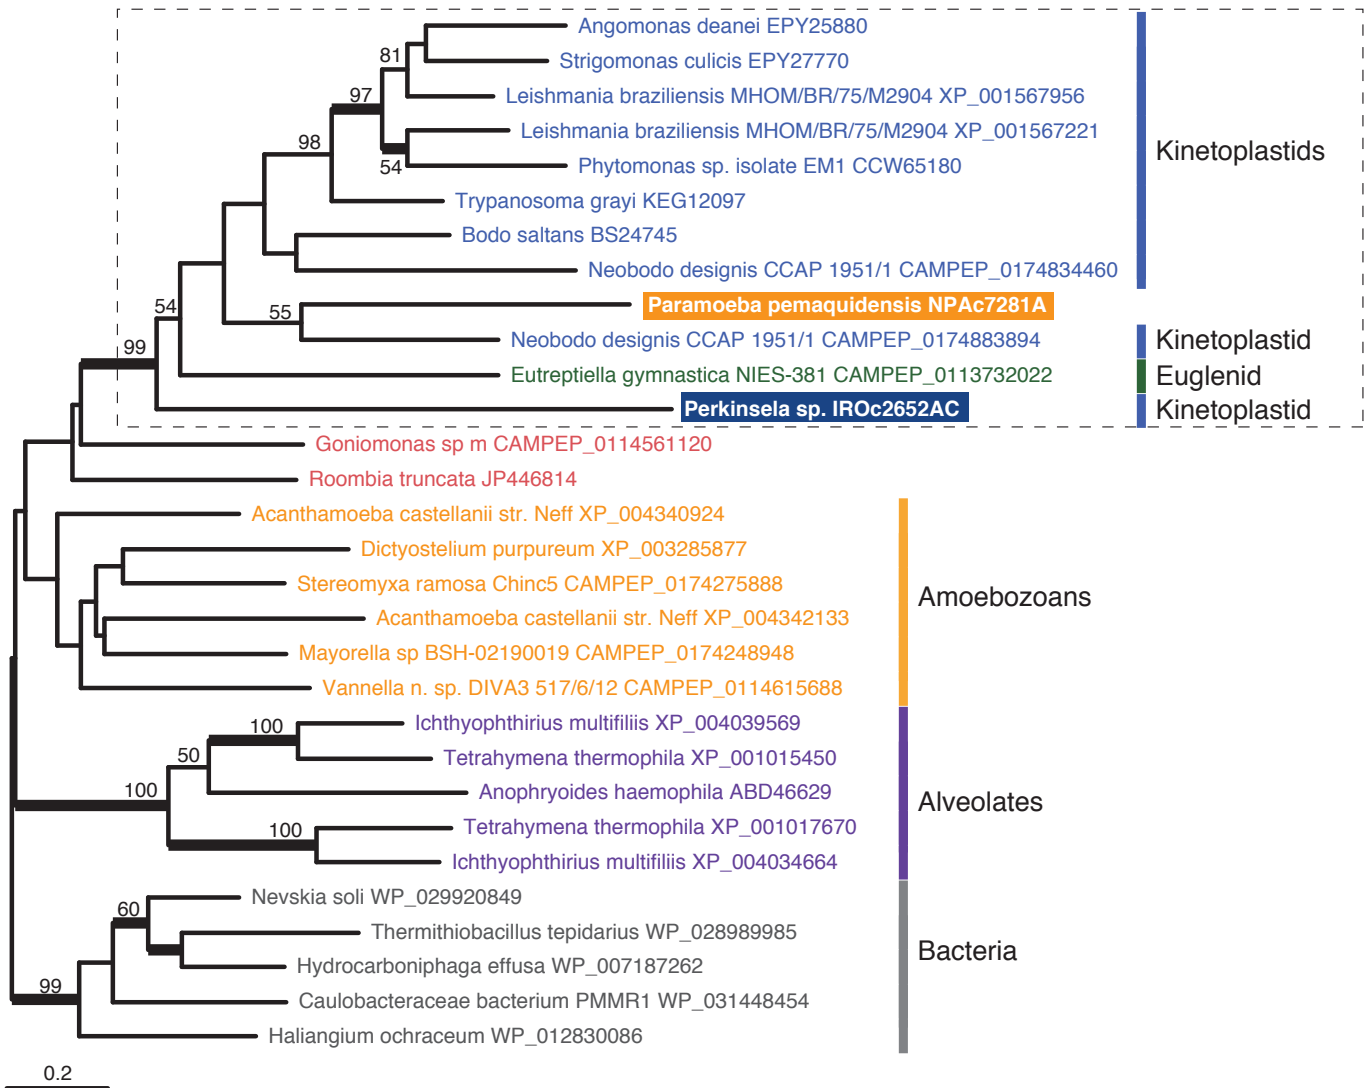

**Figure S1.6.1. (a-h)** Maximum likelihood phylogenetic trees of candidate genes / proteins derived by endosymbiotic gene transfer (EGT).

**b** Tree ID: 4149  
 Query protein: NPAc3631A  
 Putative function: Mitochondrial ADP/ATP translocase

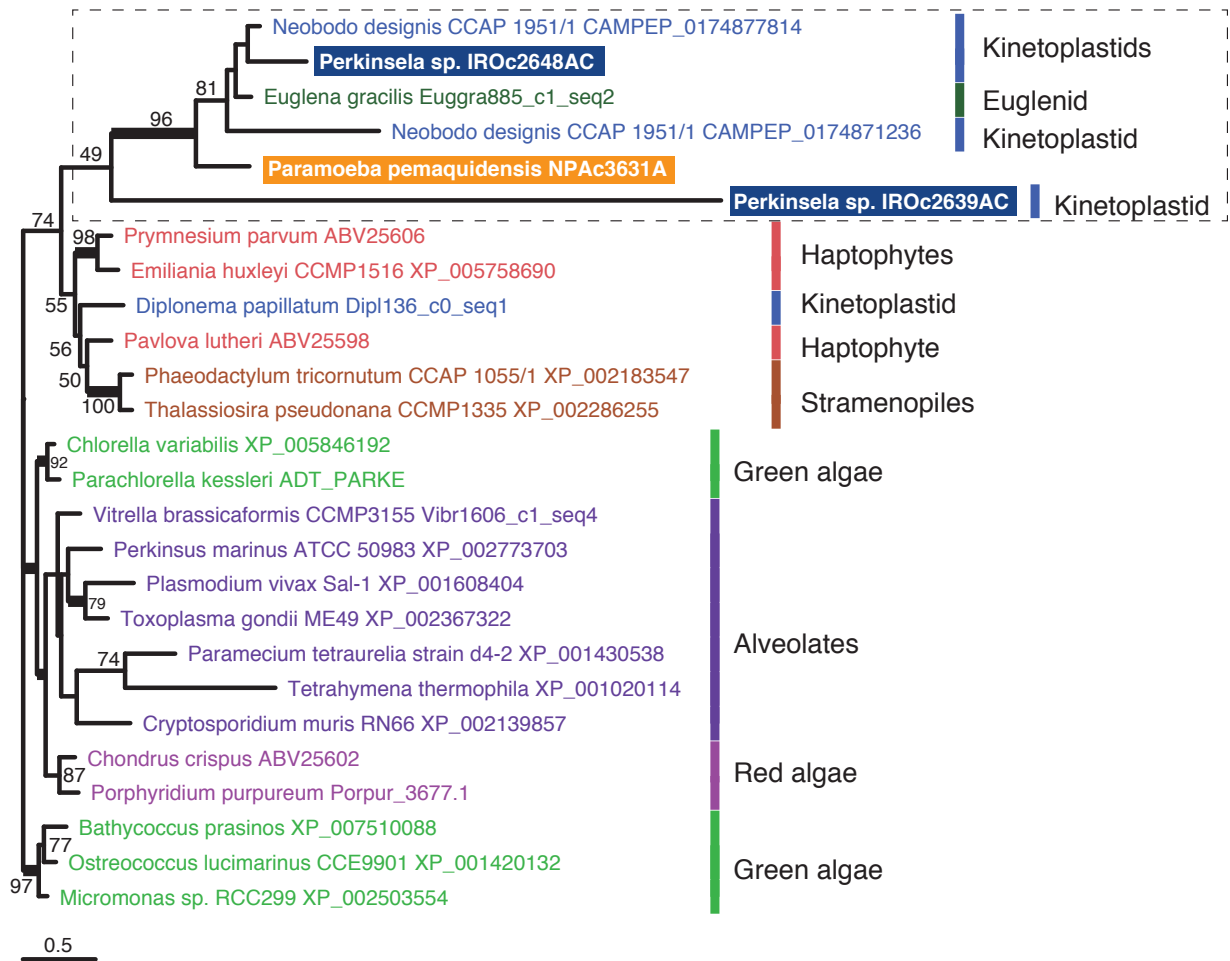

**Figure S1.6.1. (a-h)** Maximum likelihood phylogenetic trees of candidate genes / proteins derived by endosymbiotic gene transfer (EGT).

**C** Tree ID: 7855  
 Query proteins: NPAc7727A & NPAc6887A  
 Putative function: Mitochondrial carrier protein

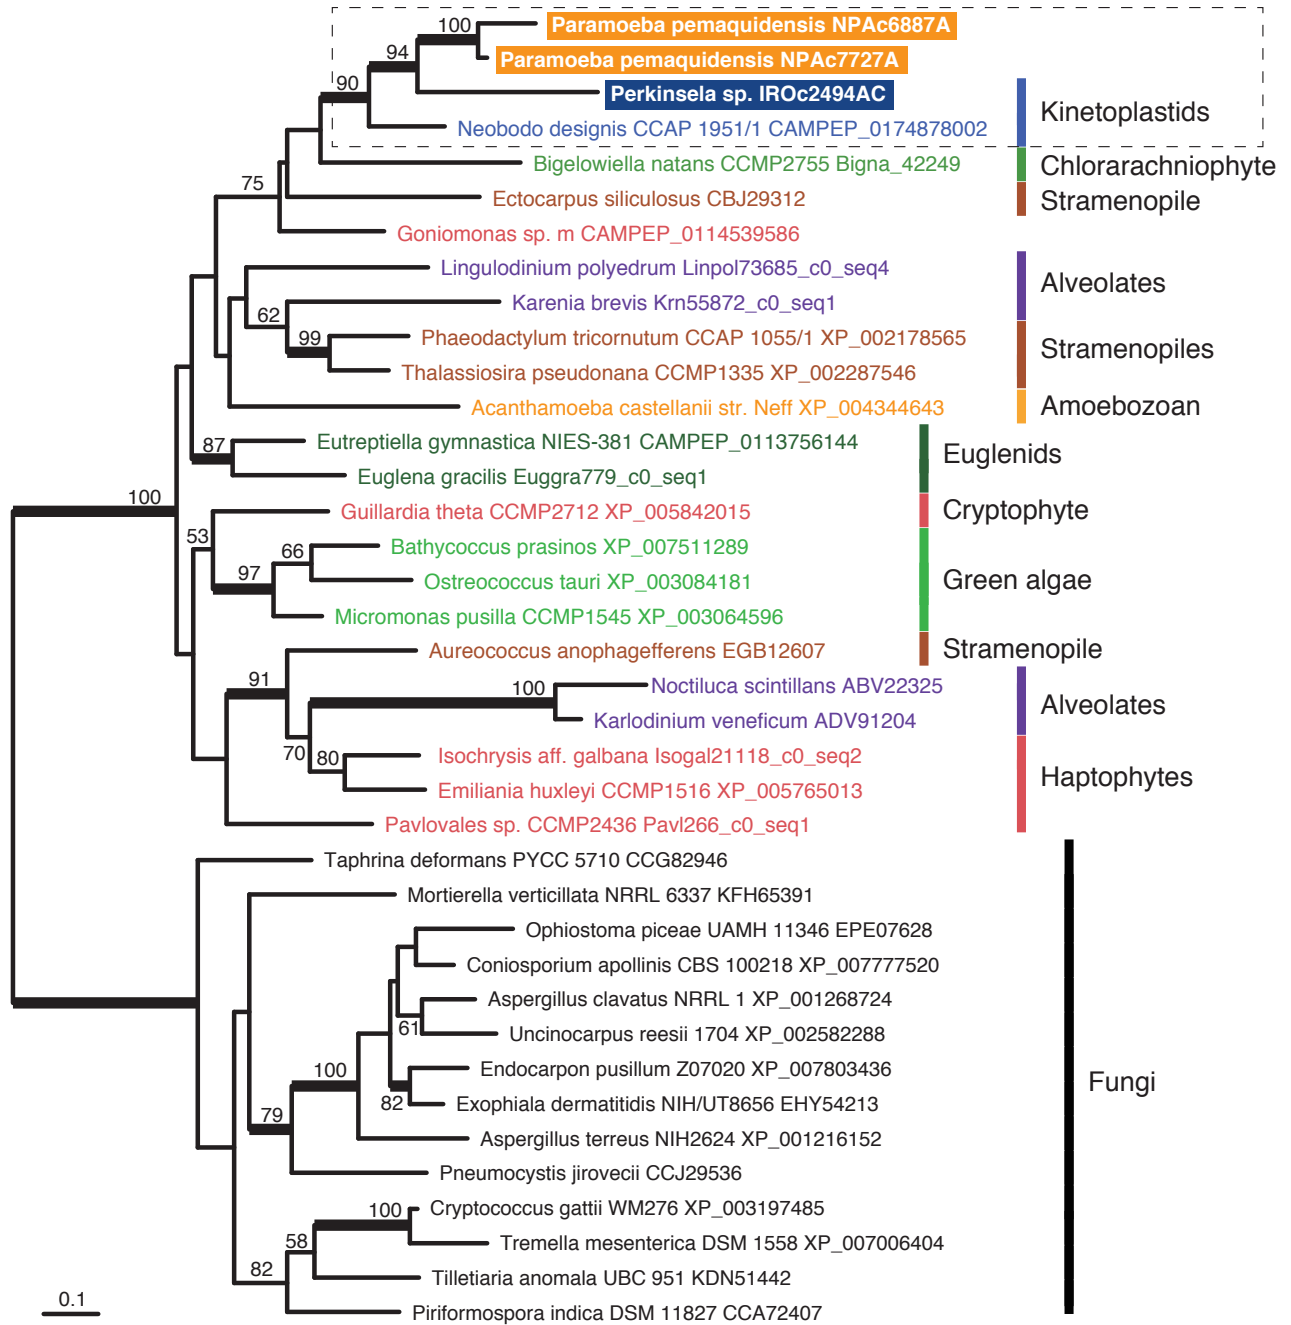

**Figure S1.6.1. (a-h)** Maximum likelihood phylogenetic trees of candidate genes / proteins derived by endosymbiotic gene transfer (EGT).

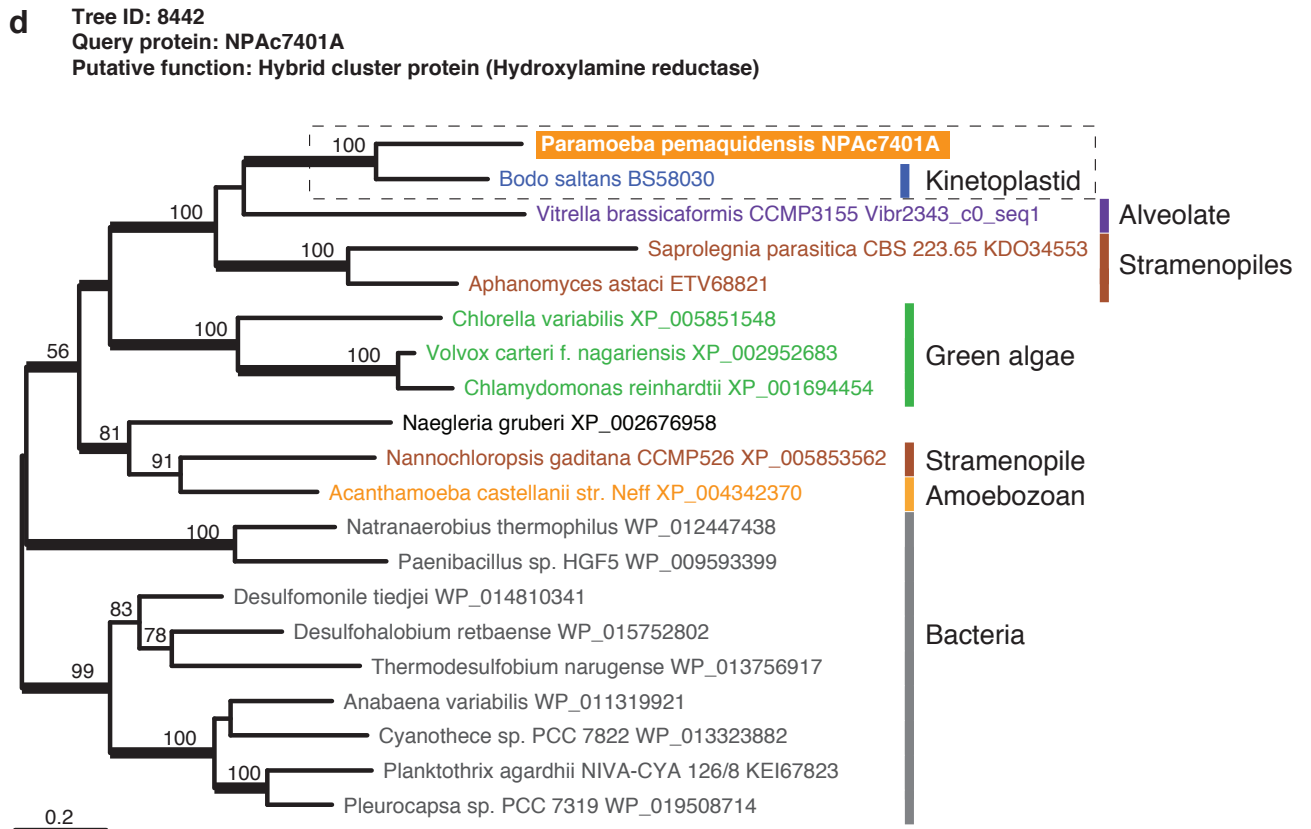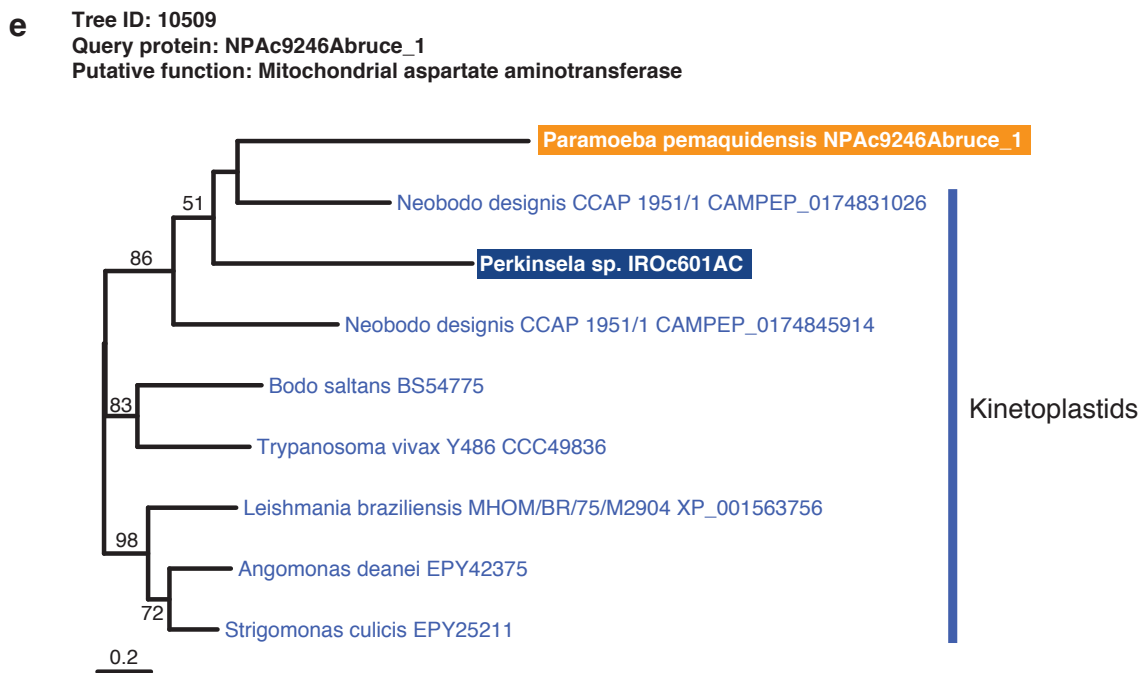

Figure S1.6.1. (a-h) Maximum likelihood phylogenetic trees of candidate genes / proteins derived by endosymbiotic gene transfer (EGT).

**f** Tree ID: 2330  
 Query protein: NPAc2055A  
 Putative function: Alkene reductase-like protein

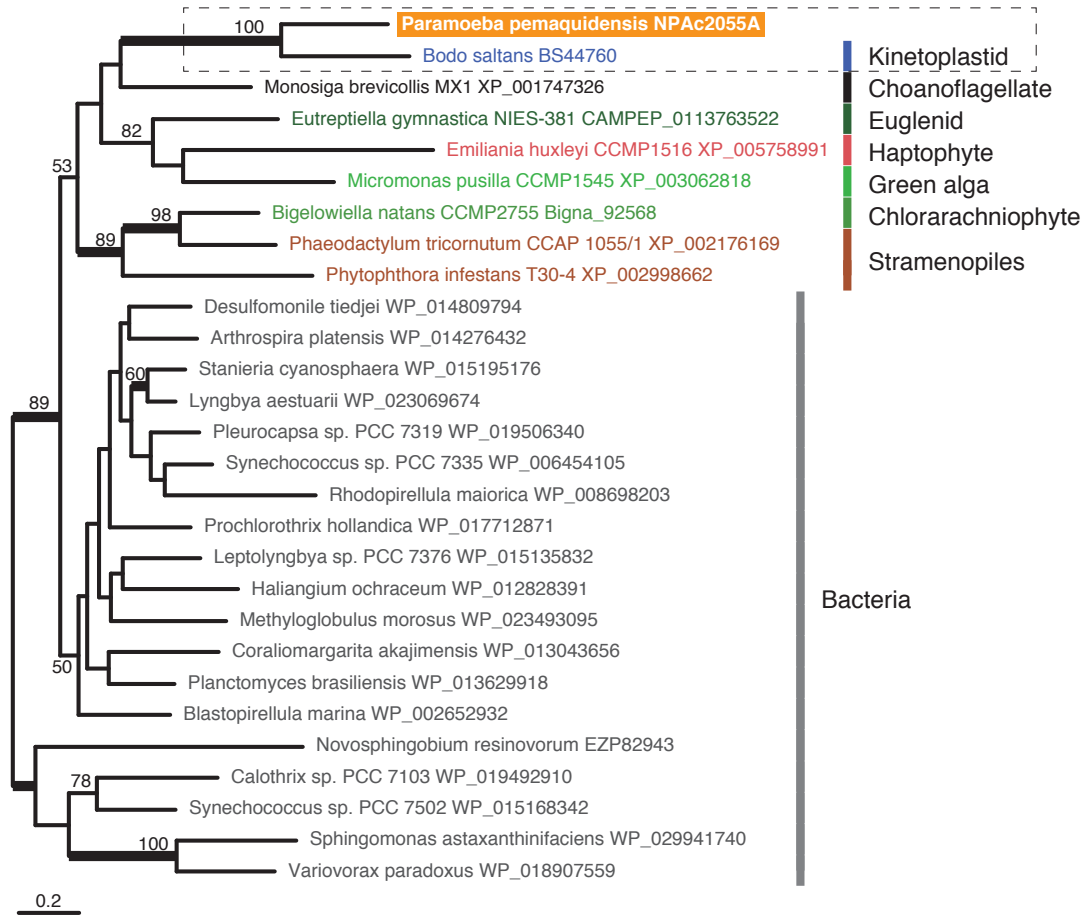

**g** Tree ID: 11325  
 Query protein: NPAc9974A  
 Putative function: Retrotransposon hotspot-like protein

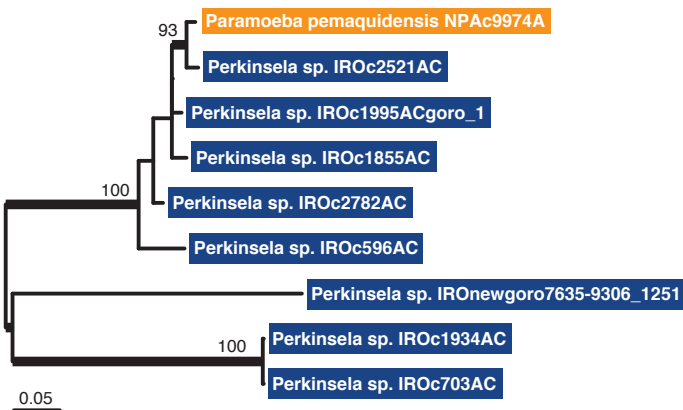

**h** Tree ID: 11133  
 Query protein: NPAc9801A  
 Putative function: unknown

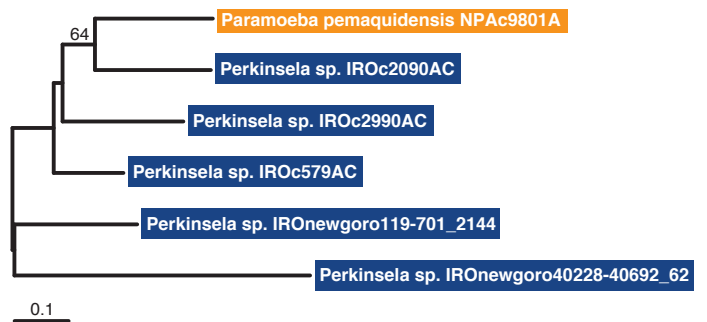

**Figure S1.6.1. (a-h)** Maximum likelihood phylogenetic trees of candidate genes / proteins derived by endosymbiotic gene transfer (EGT).

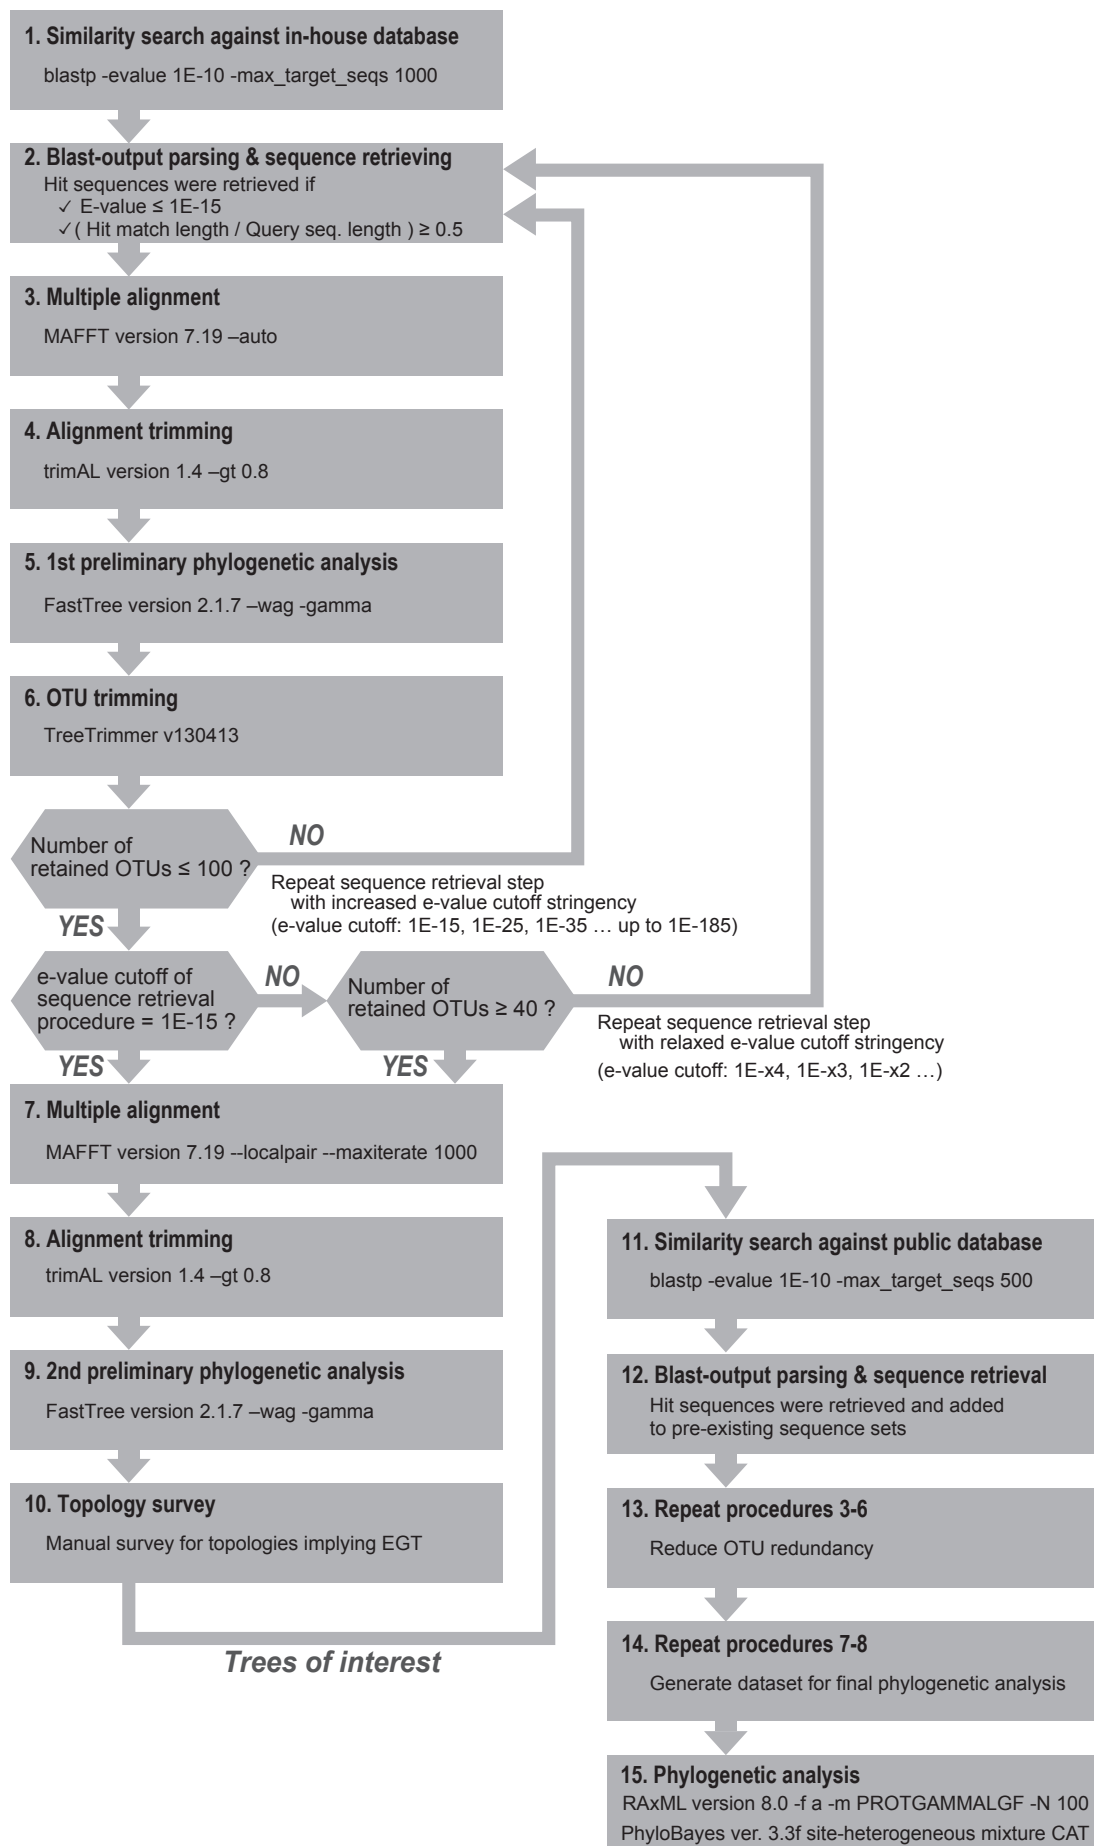

**Fig. S1.6.2.** Phylogenomics pipeline for investigating endosymbiotic gene transfer (EGT).



**a Mitochondrial ADP/ATP translocase (Tree ID 4149)**

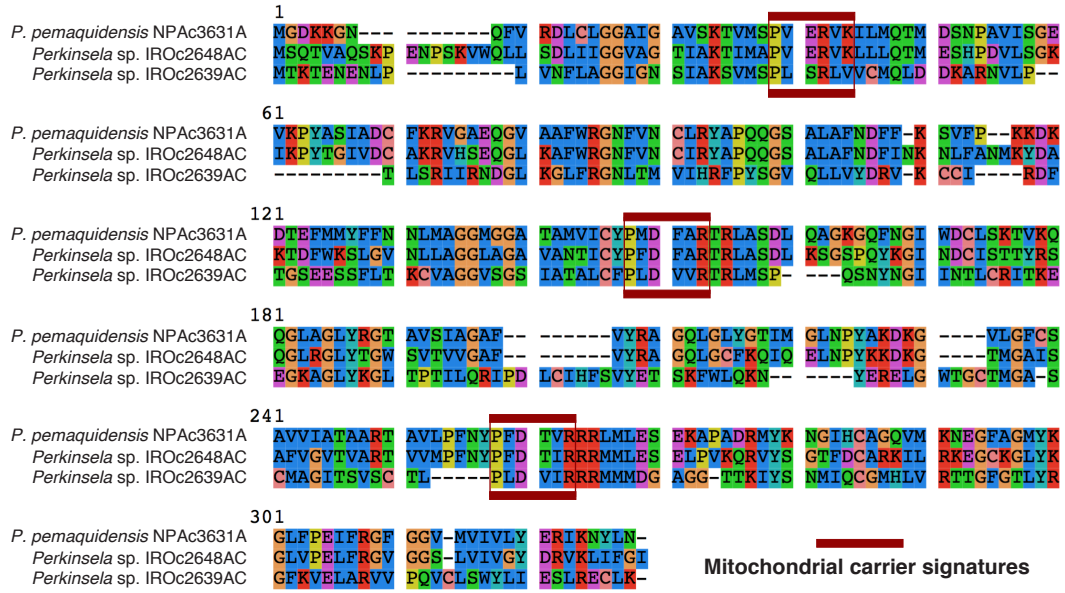

**b Mitochondrial carrier protein (Tree ID 7855)**

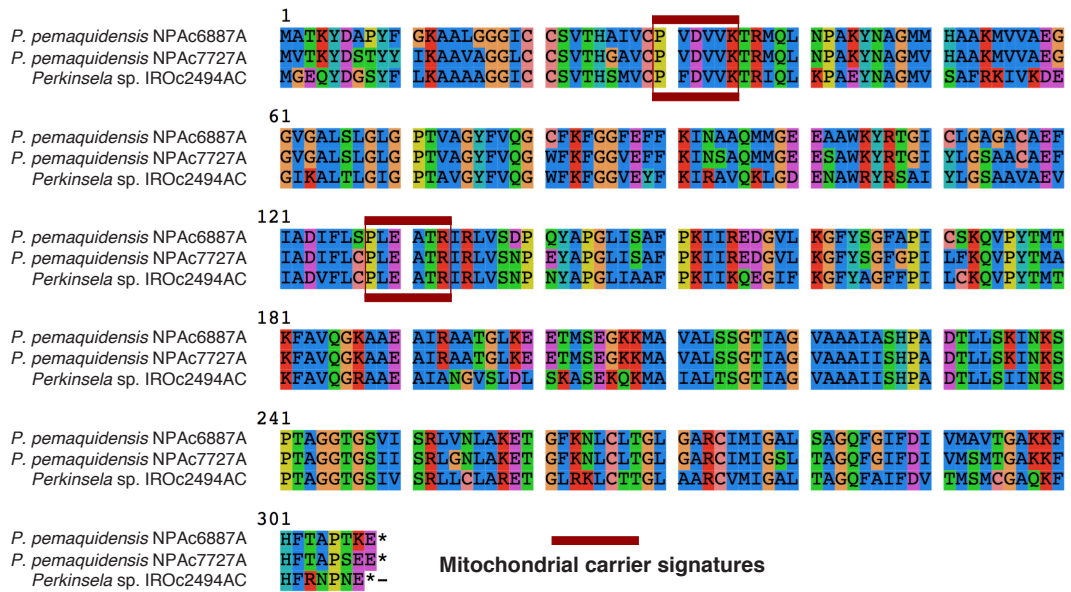

**Figure. S1.6.3.** Mitochondrial carrier signature sequences in *Paramoeba pemaquidensis* proteins derived by endosymbiotic gene transfer (EGT).

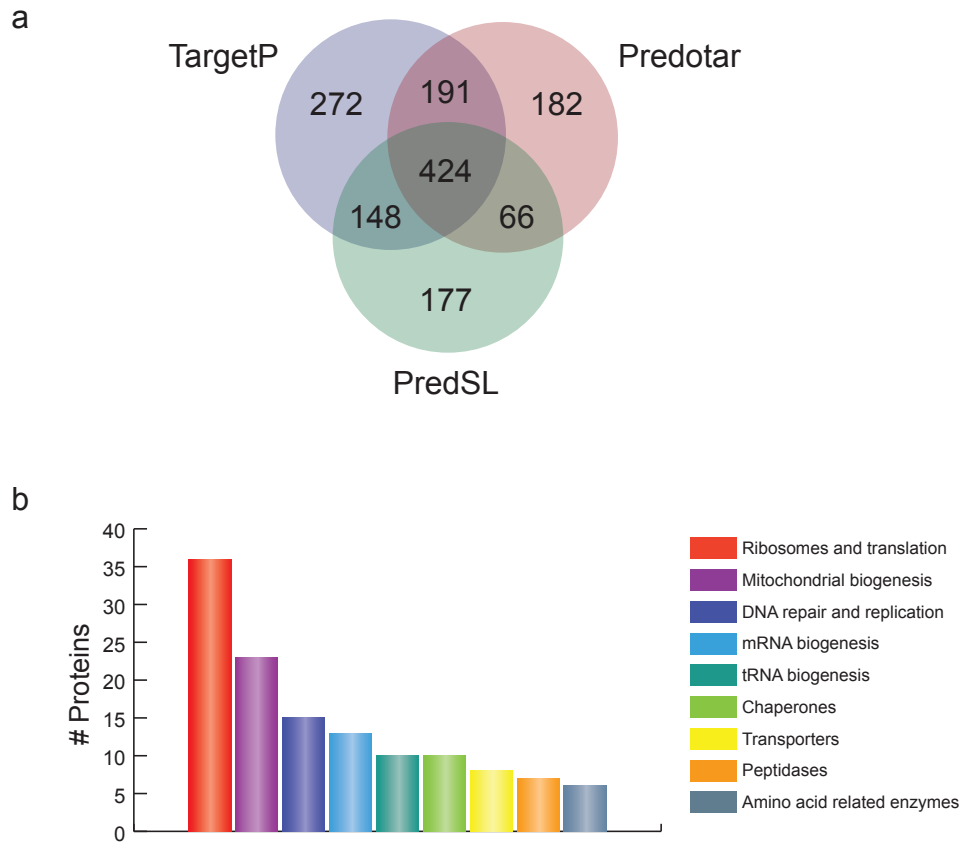

**Figure. S1.7.1.** Mitochondrial proteome of *Perkinsela* sp.

# *Paramoeba pemaquidensis* cytosol

## *Perkinsela* sp. cytosol

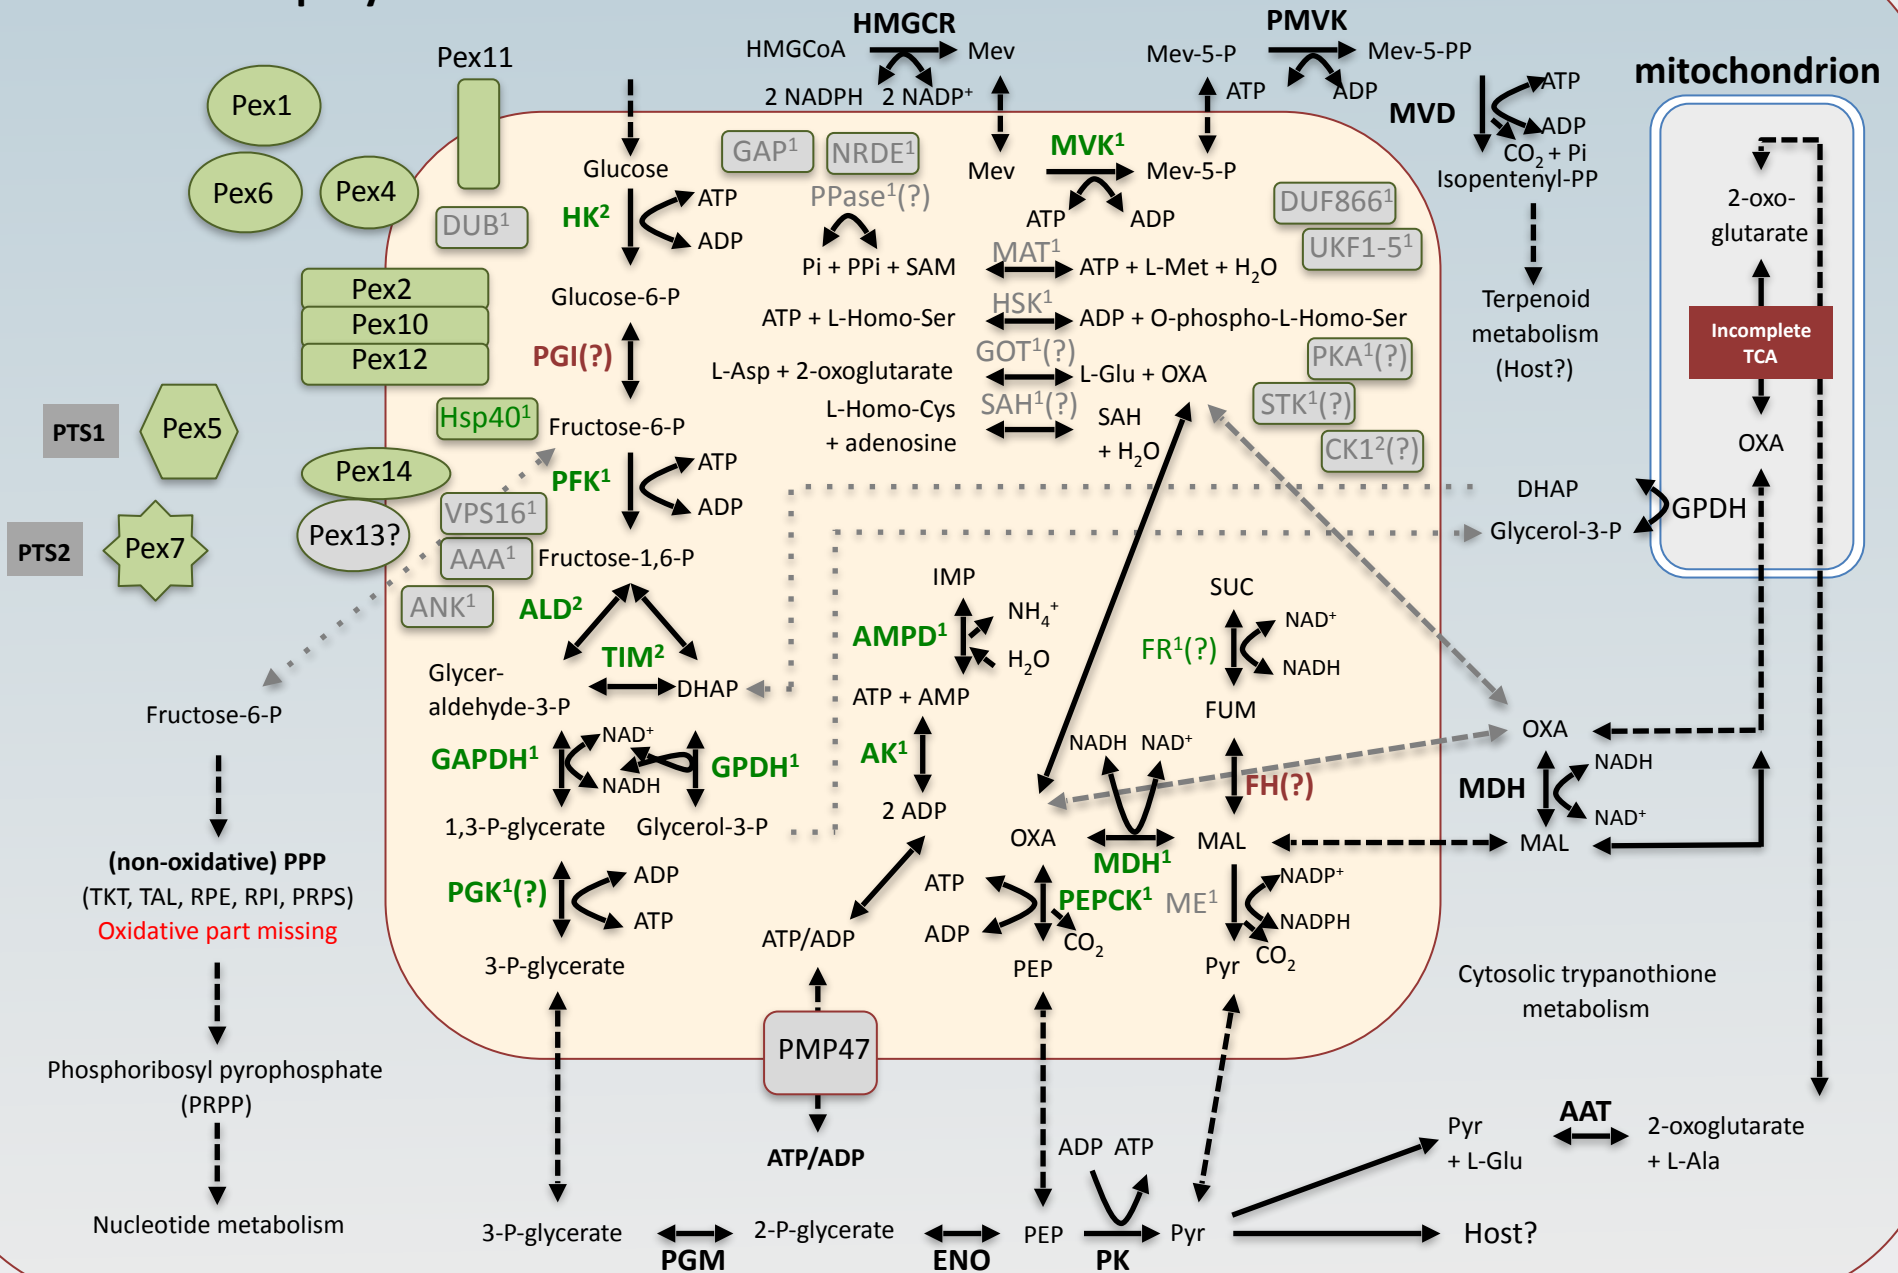

Supp. Fig. S2.5.1. Predicted metabolic map of the *Perkinsela* sp. glycosome-like organelle and associated pathways.



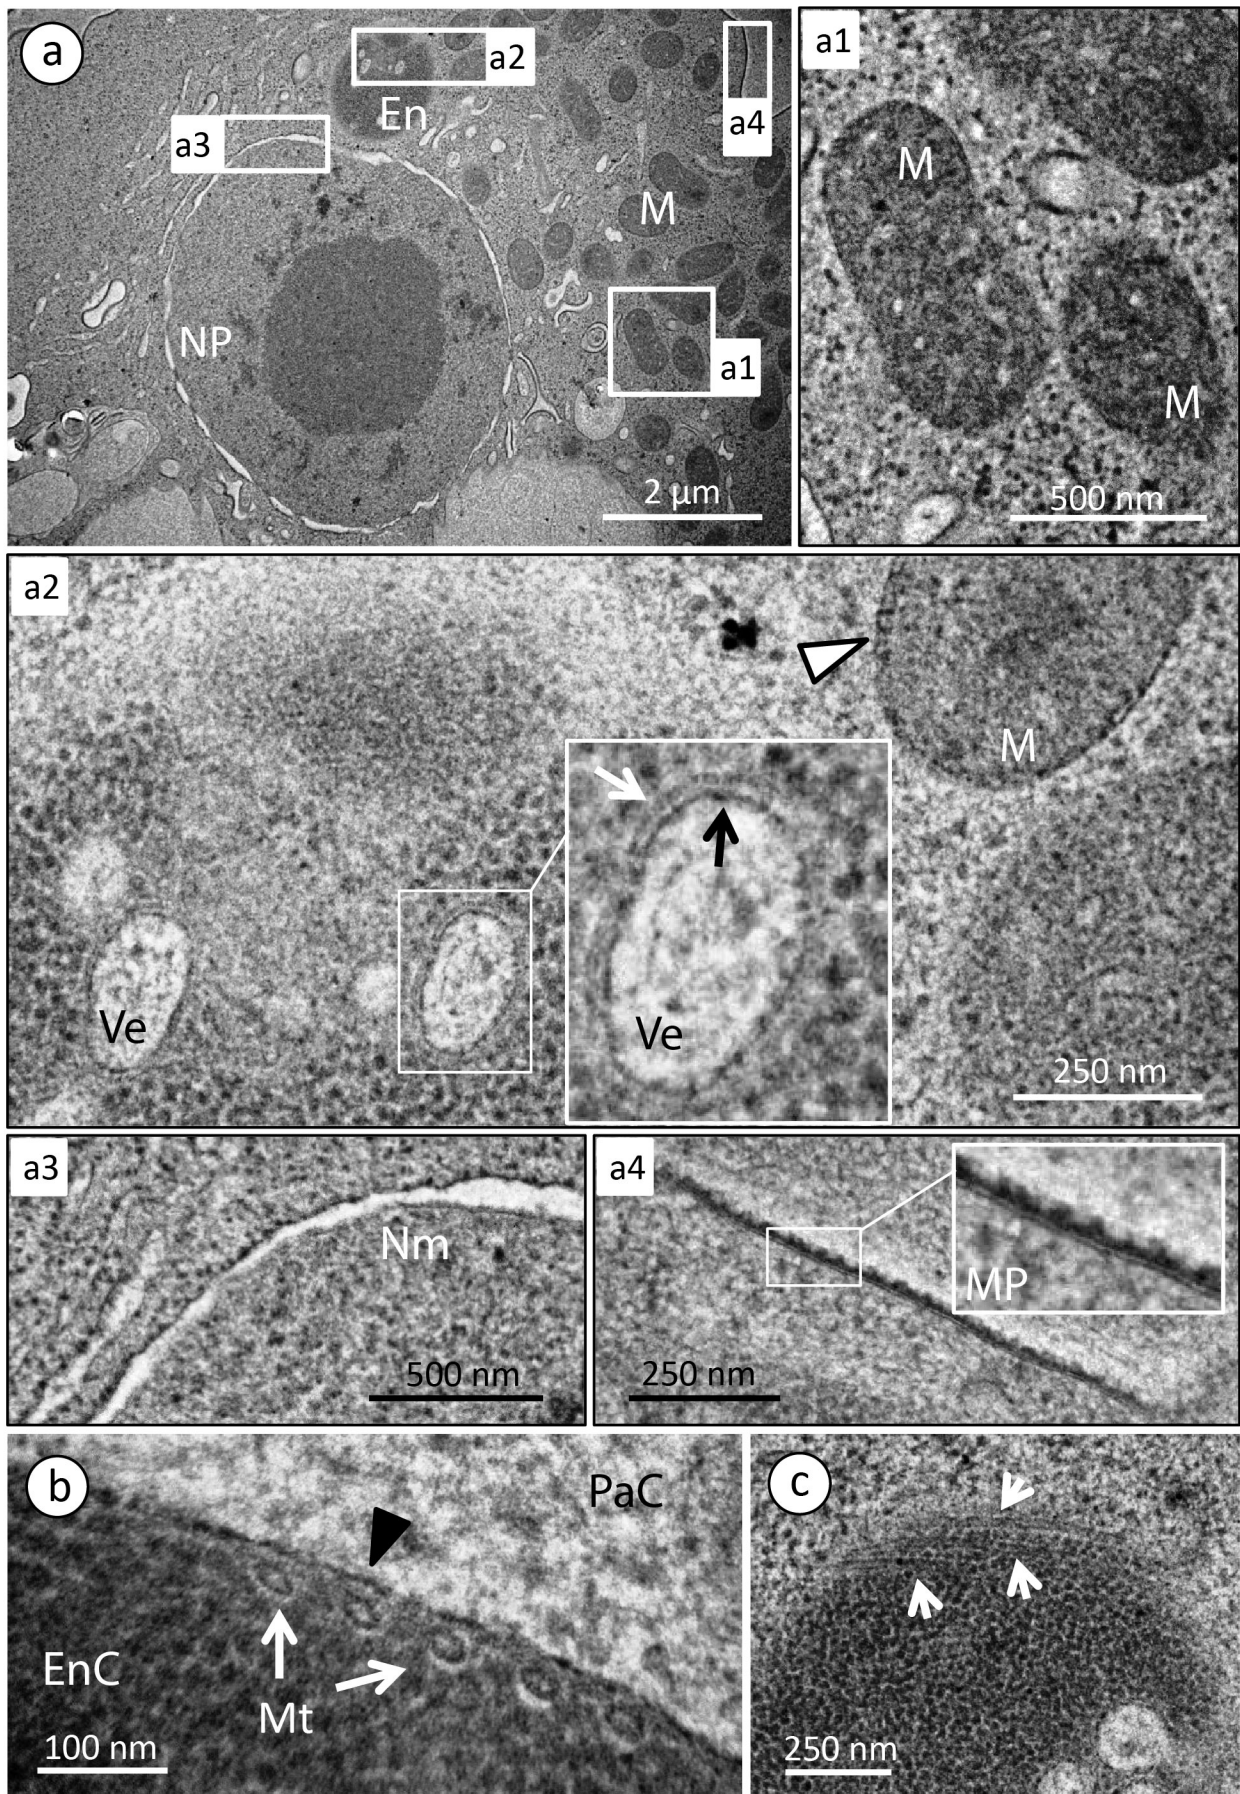

**Figure. S2.6.1.** Transmission electron micrographs of the amoebozoan *Paramoeba pemaquidensis* CCAP 1560/4 and its kinetoplastid endosymbiont *Perkinsela* sp.

**Fig S2.7.1:** Workflow for the identification of transporter protein genes in the *Perkinsela* sp. and *Paramoeba pemaquidensis* nuclear genomes.

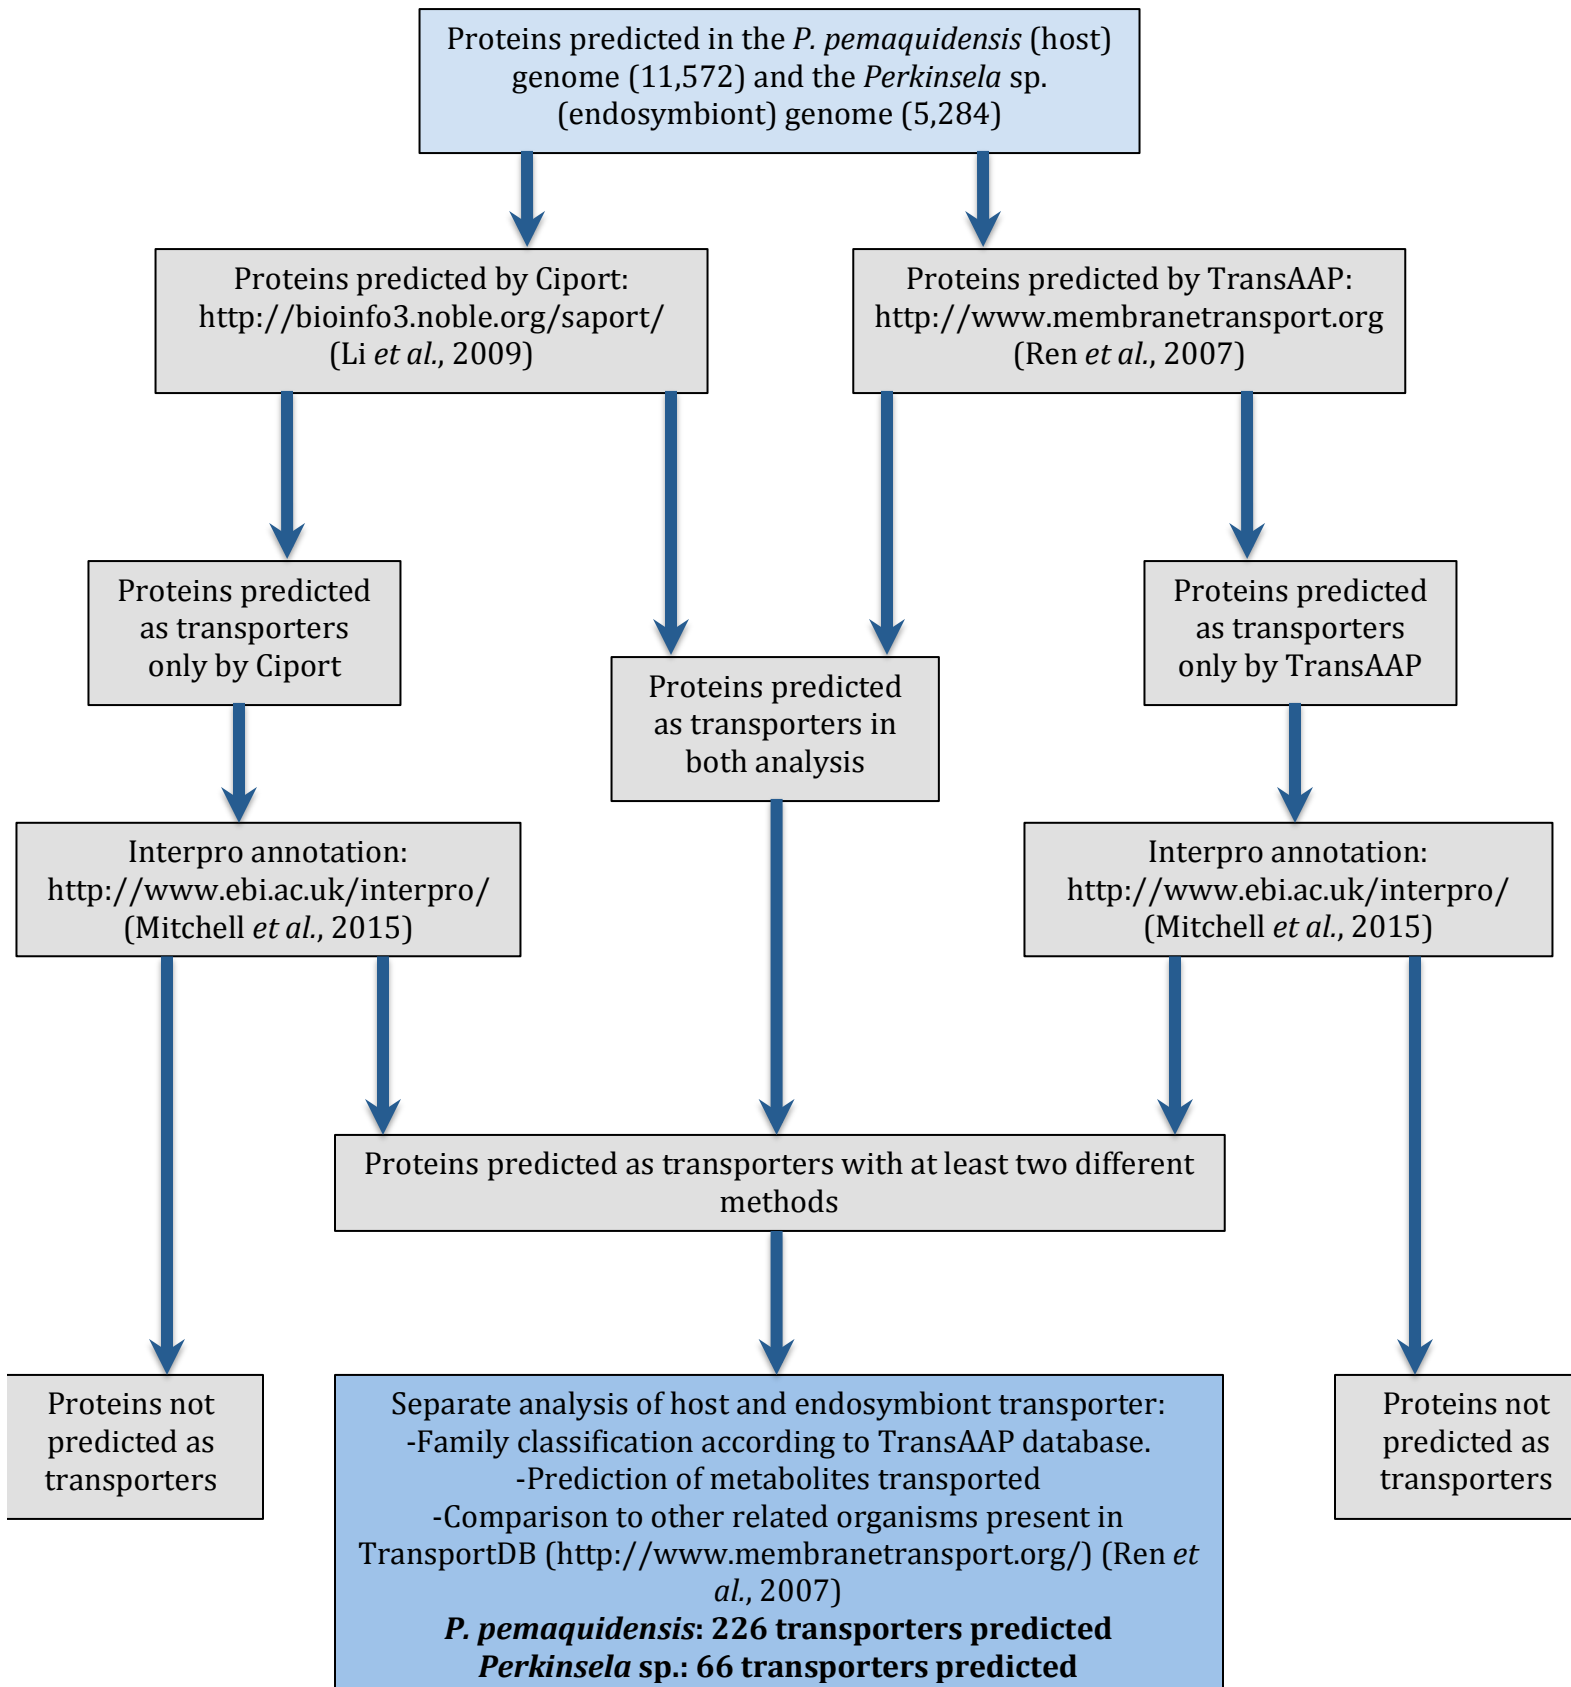

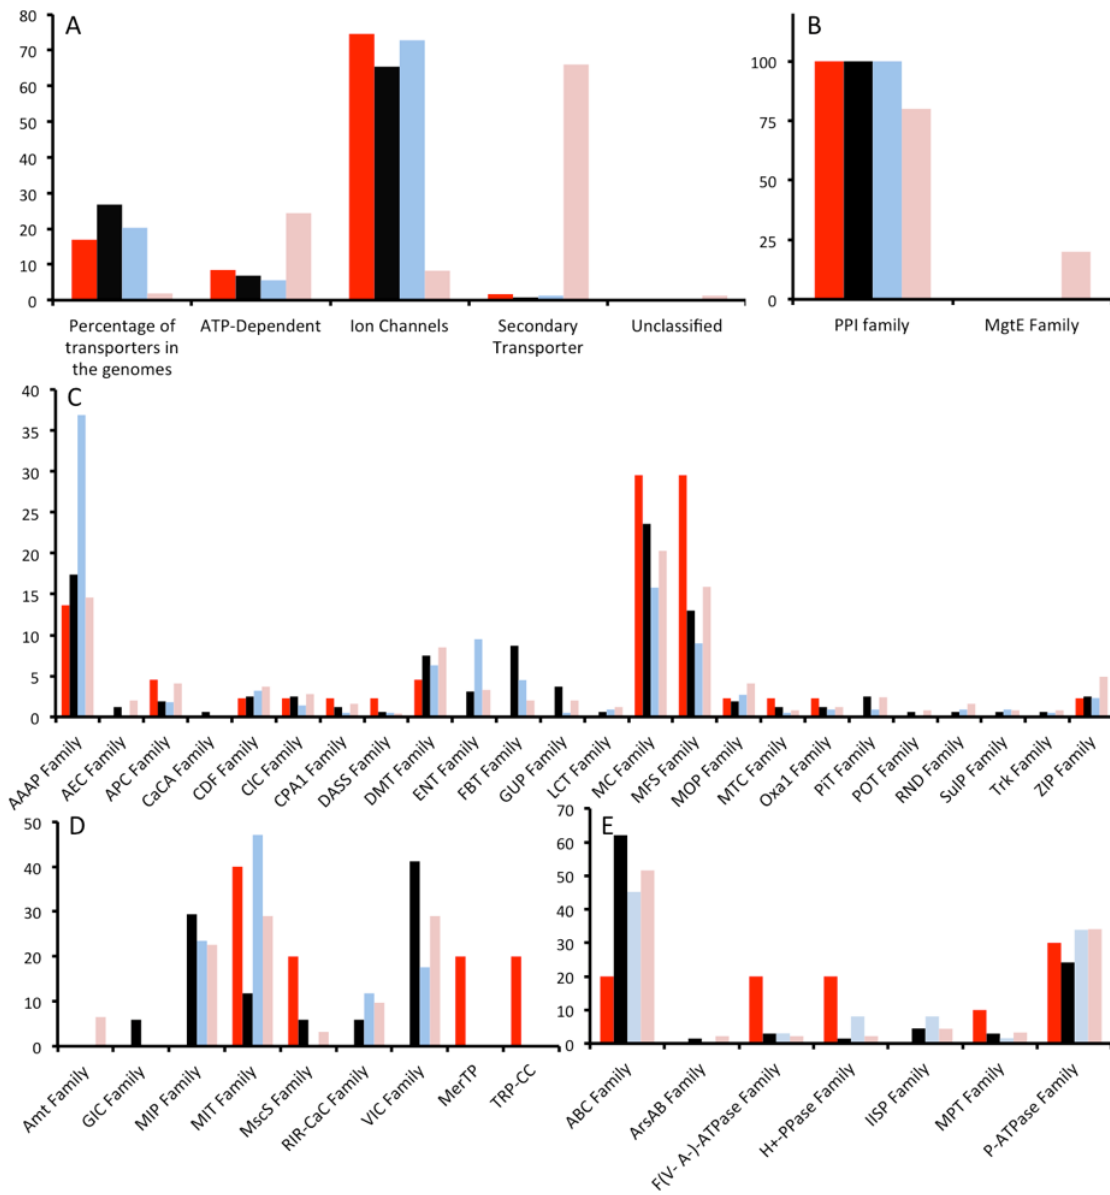

**Figure. S2.7.2.** Classification of *Perkinsela. sp.* transporter proteins and those of select organisms using TransportDB. (See text for full figure legend).



**Fig. S.2.7.3.** Workflow for prediction and analysis of *Perkinsela* sp. secreted proteins. (1) Proteins secreted into the host cytosol, (2) proteins present in the plasma membrane (with transmembrane domain) and (3) proteins present in the plasma membrane (with GPI anchor).

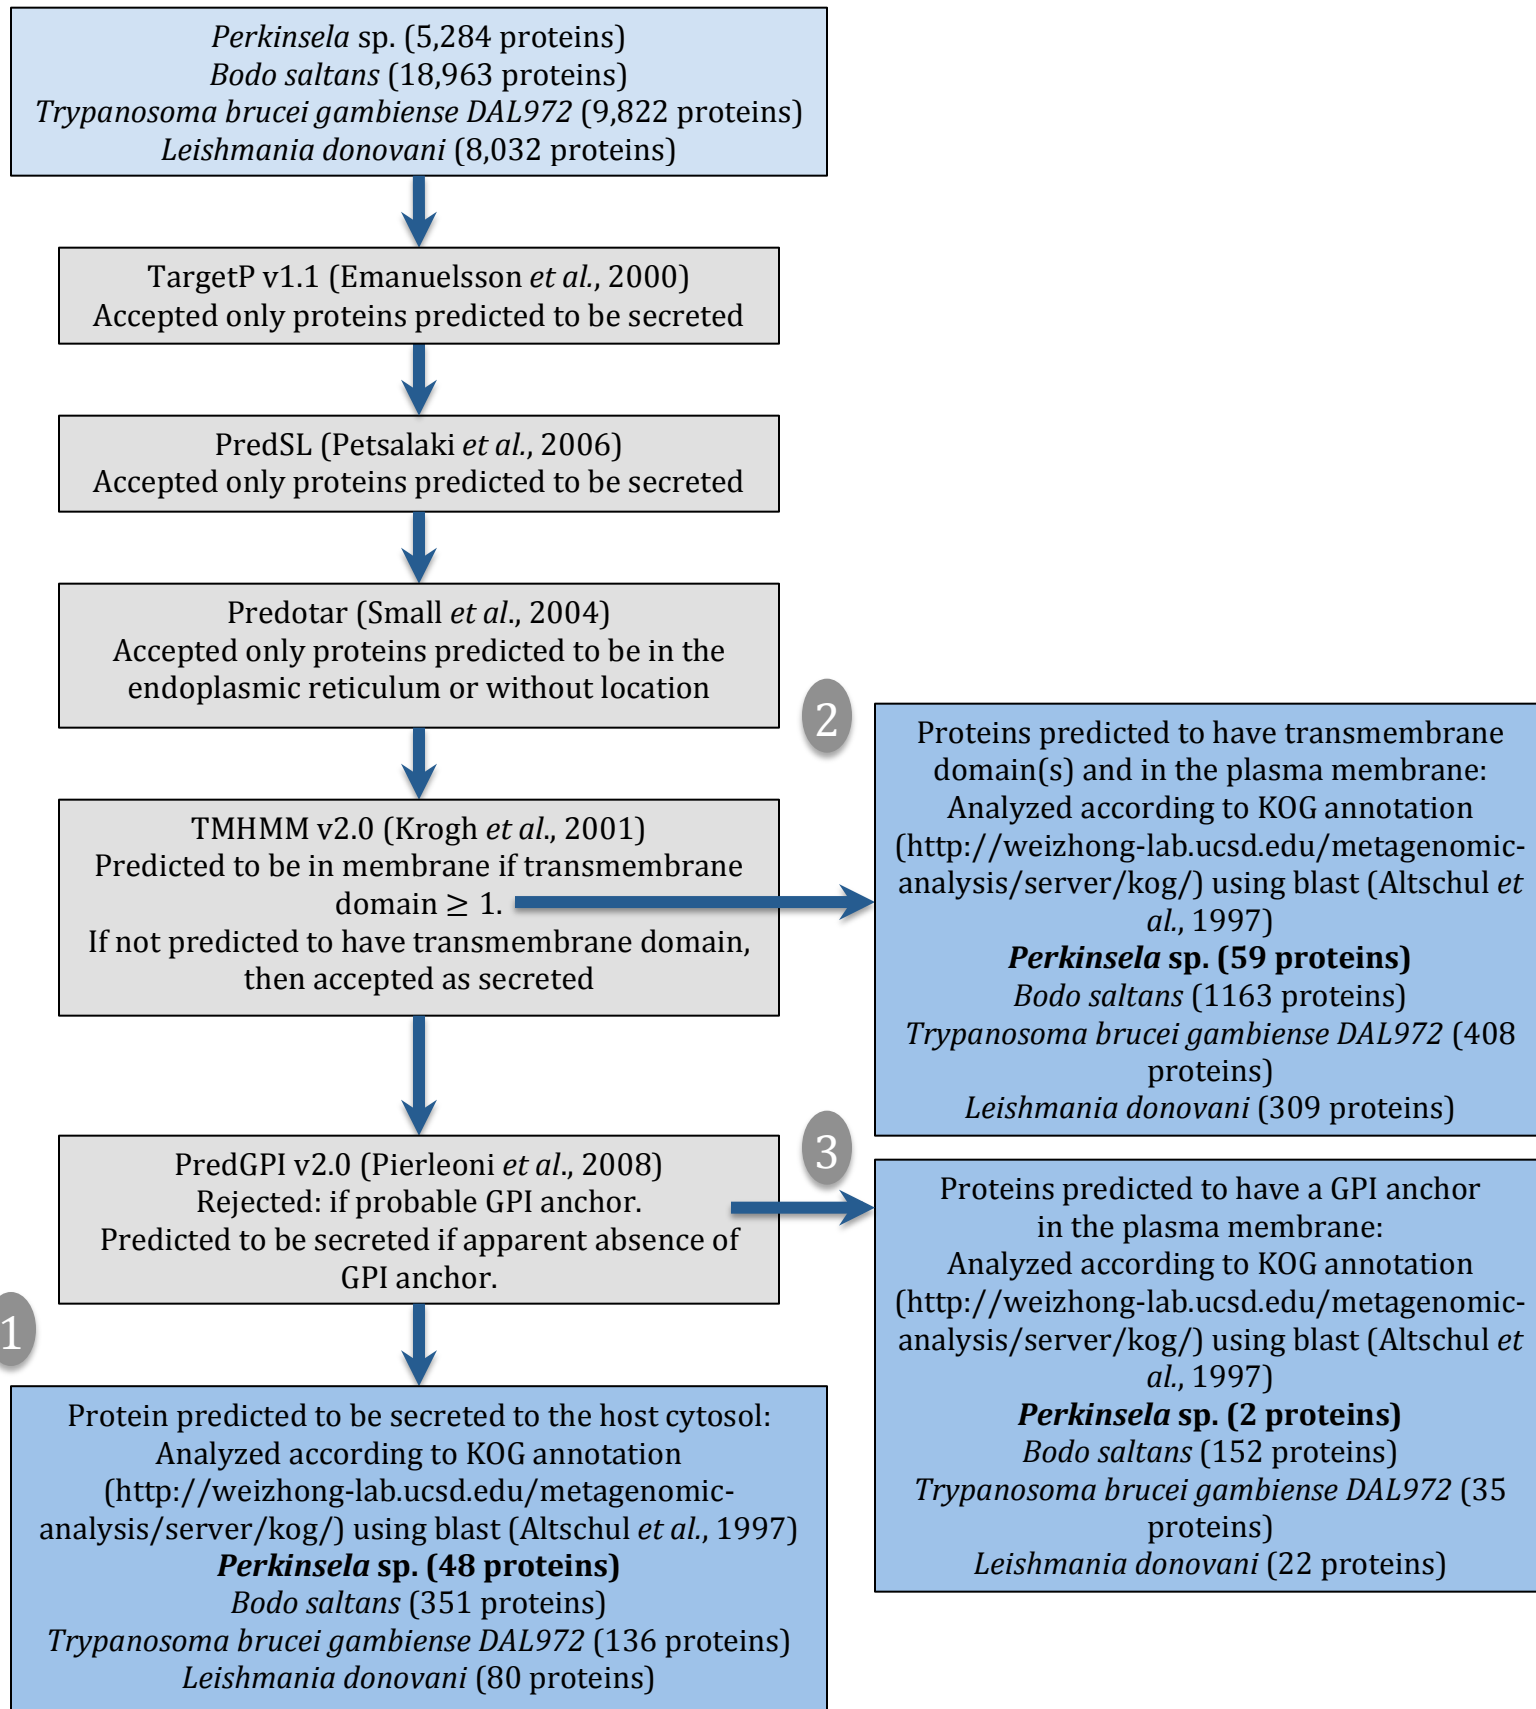

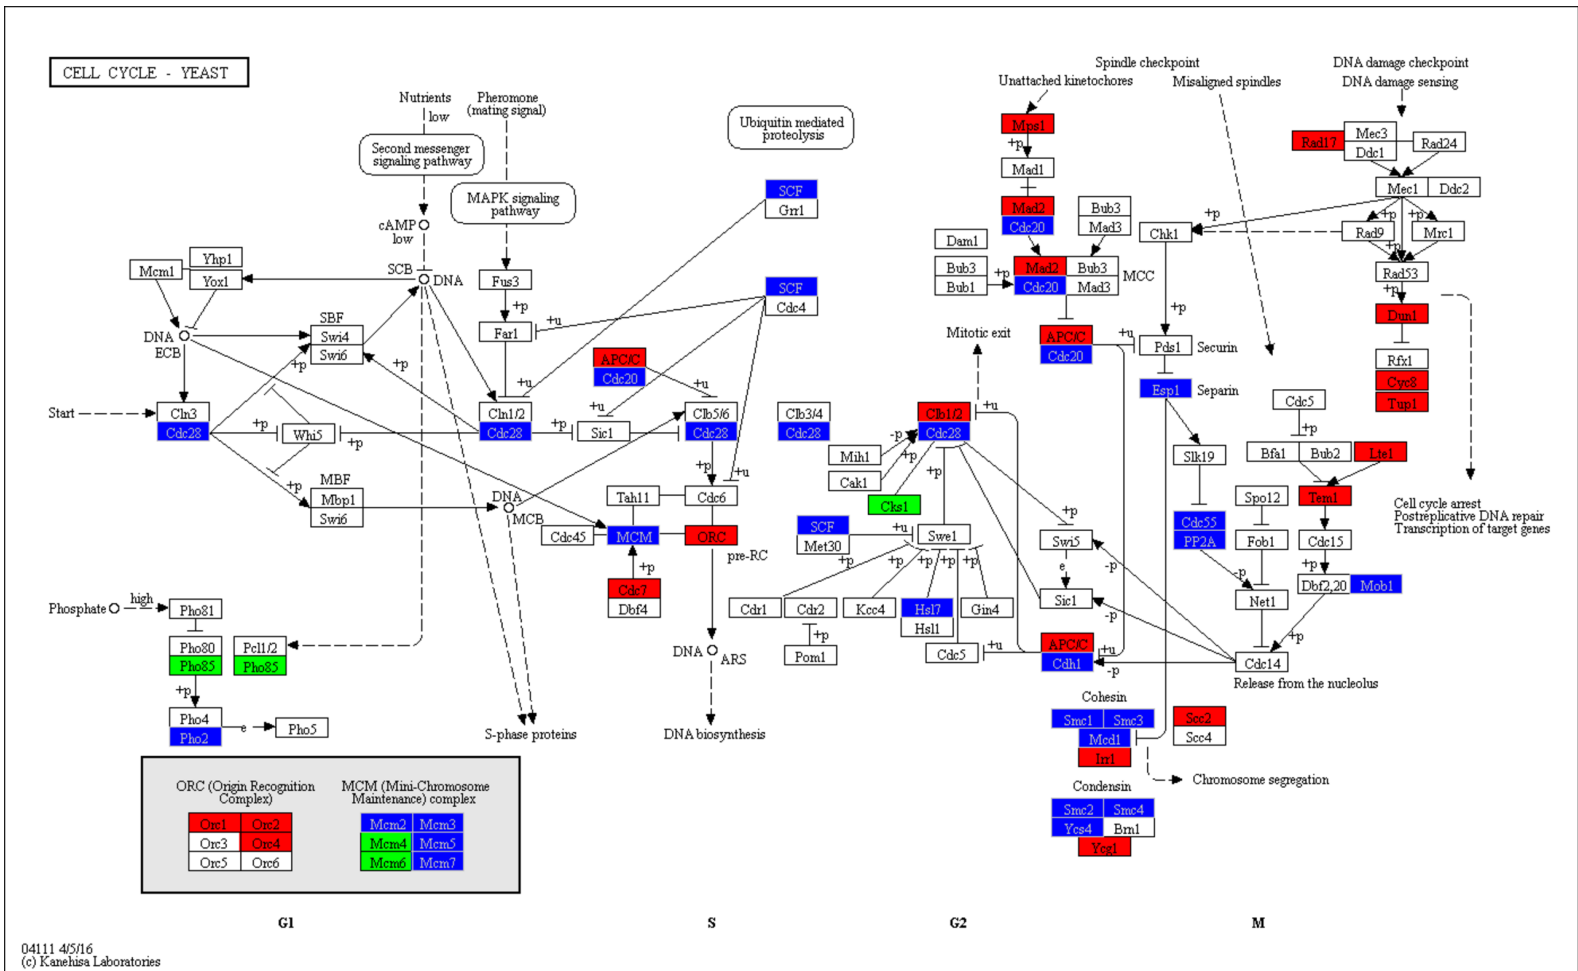

**Figure. S2.8.1.** KEGG pathway showing cell cycle-associated proteins. Proteins present in both *Perkinsela sp.* (endosymbiont) and *Paramoeba pemaquidensis* (host) are highlighted blue, those only in *P. pemaquidensis* are shown in red, and those only in *Perkinsela sp.* are in green.



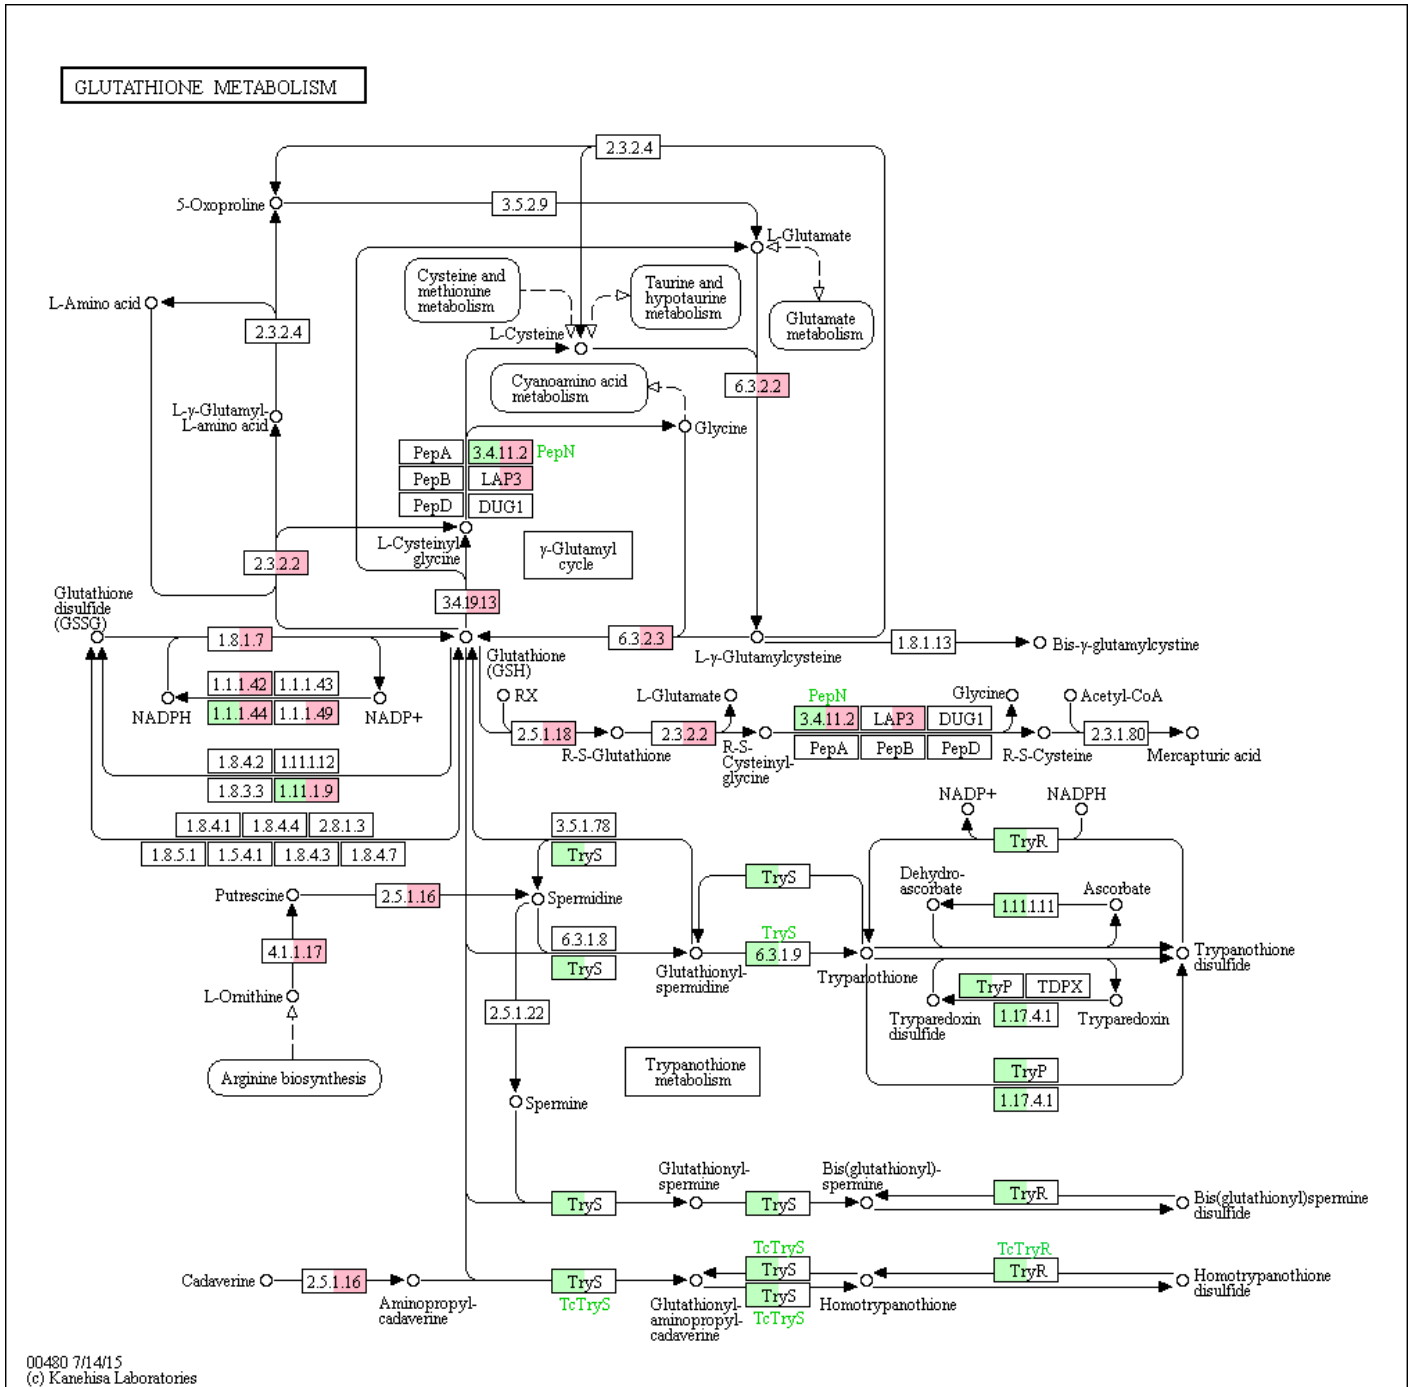

**Figure. S3.1.1a.** KEGG pathway showing glutathione / trypanothione metabolism. Proteins with clear homologs in the endosymbiont *Perkinsela* sp. are highlighted green, while those encoded in the nuclear genome of the host *Paramoeba pemaquidensis* are highlighted red. Green text corresponds to gene / enzyme names in bacteria.

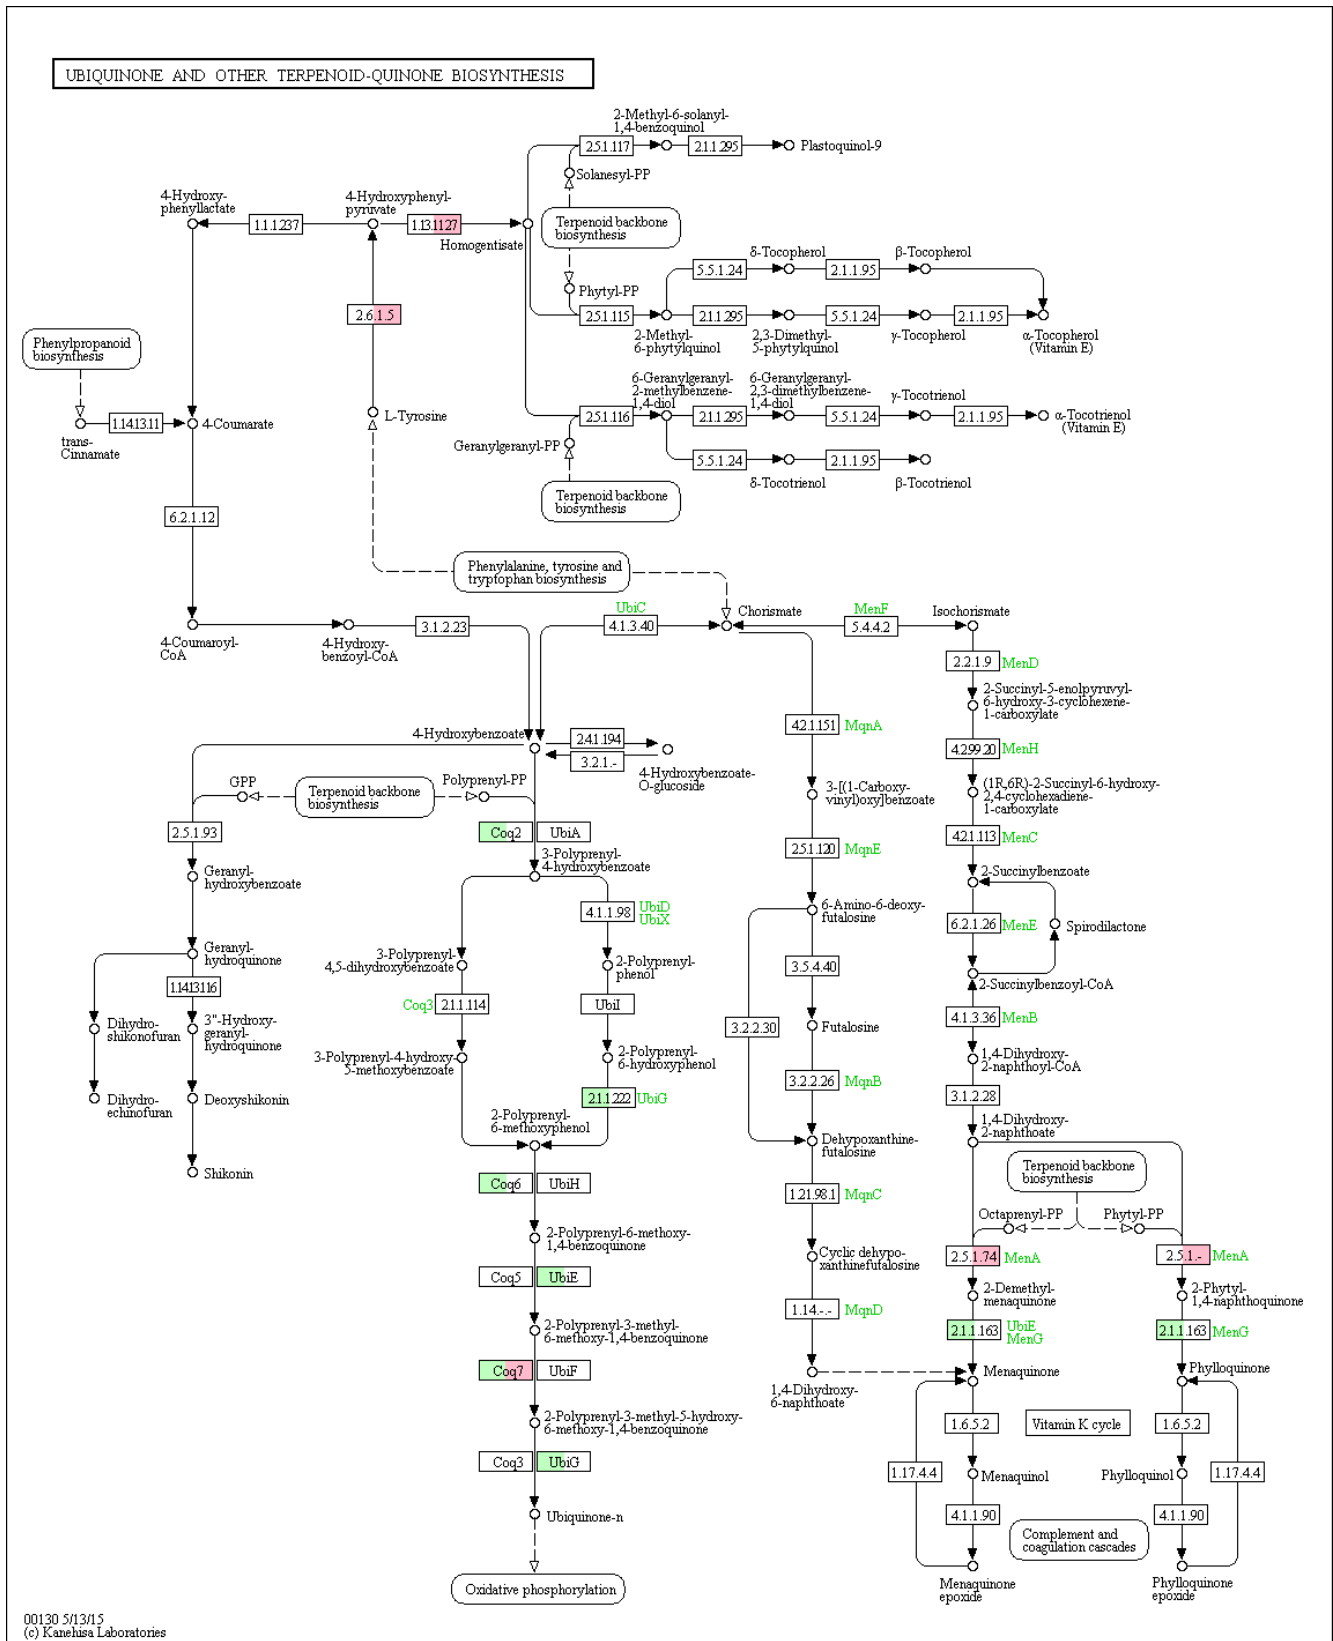

**Figure. S3.1.1b.** KEGG pathway showing ubiquinone / terpenoid-quinone metabolism. Proteins with clear homologs in the endosymbiont *Perkinsela* sp. are highlighted green, while those encoded in the nuclear genome of the host *Paramoeba pemaquidensis* are highlighted red. Green text corresponds to gene / enzyme names in bacteria.

ARGININE AND PROLINE METABOLISM

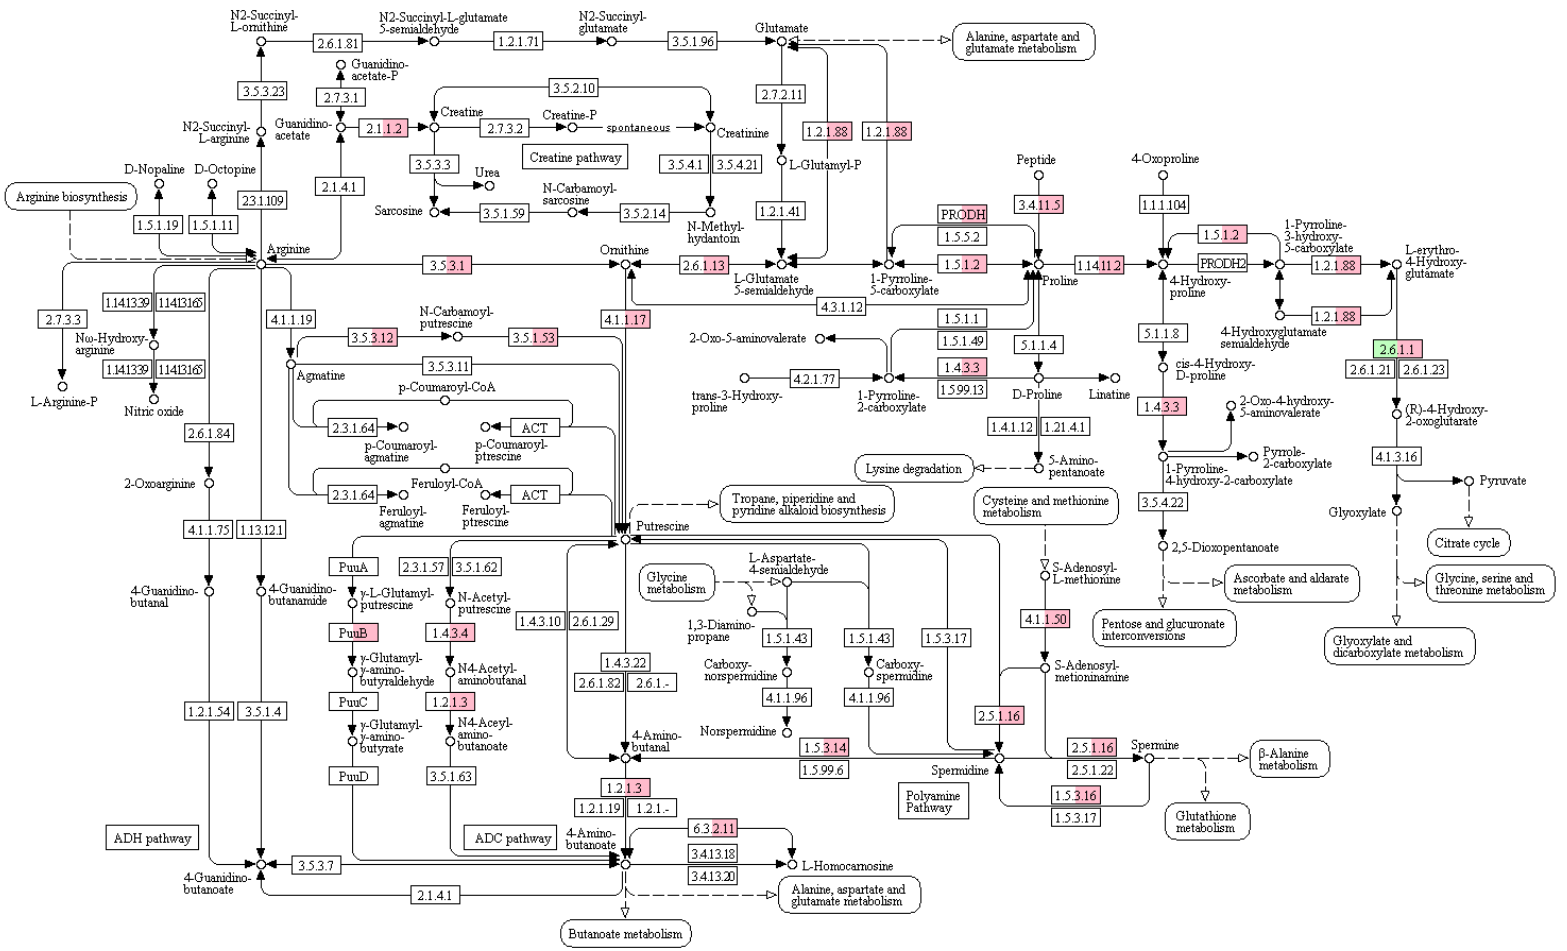

00330 2/12/16  
© Kanehisa Laboratories

**Figure. S3.1.1c.** KEGG pathway showing arginine and proline metabolism. Proteins with clear homologs in the endosymbiont *Perkinsela. sp.* are highlighted green, while those encoded in the nuclear genome of the host *Paramoeba pemaquidensis* are highlighted red.

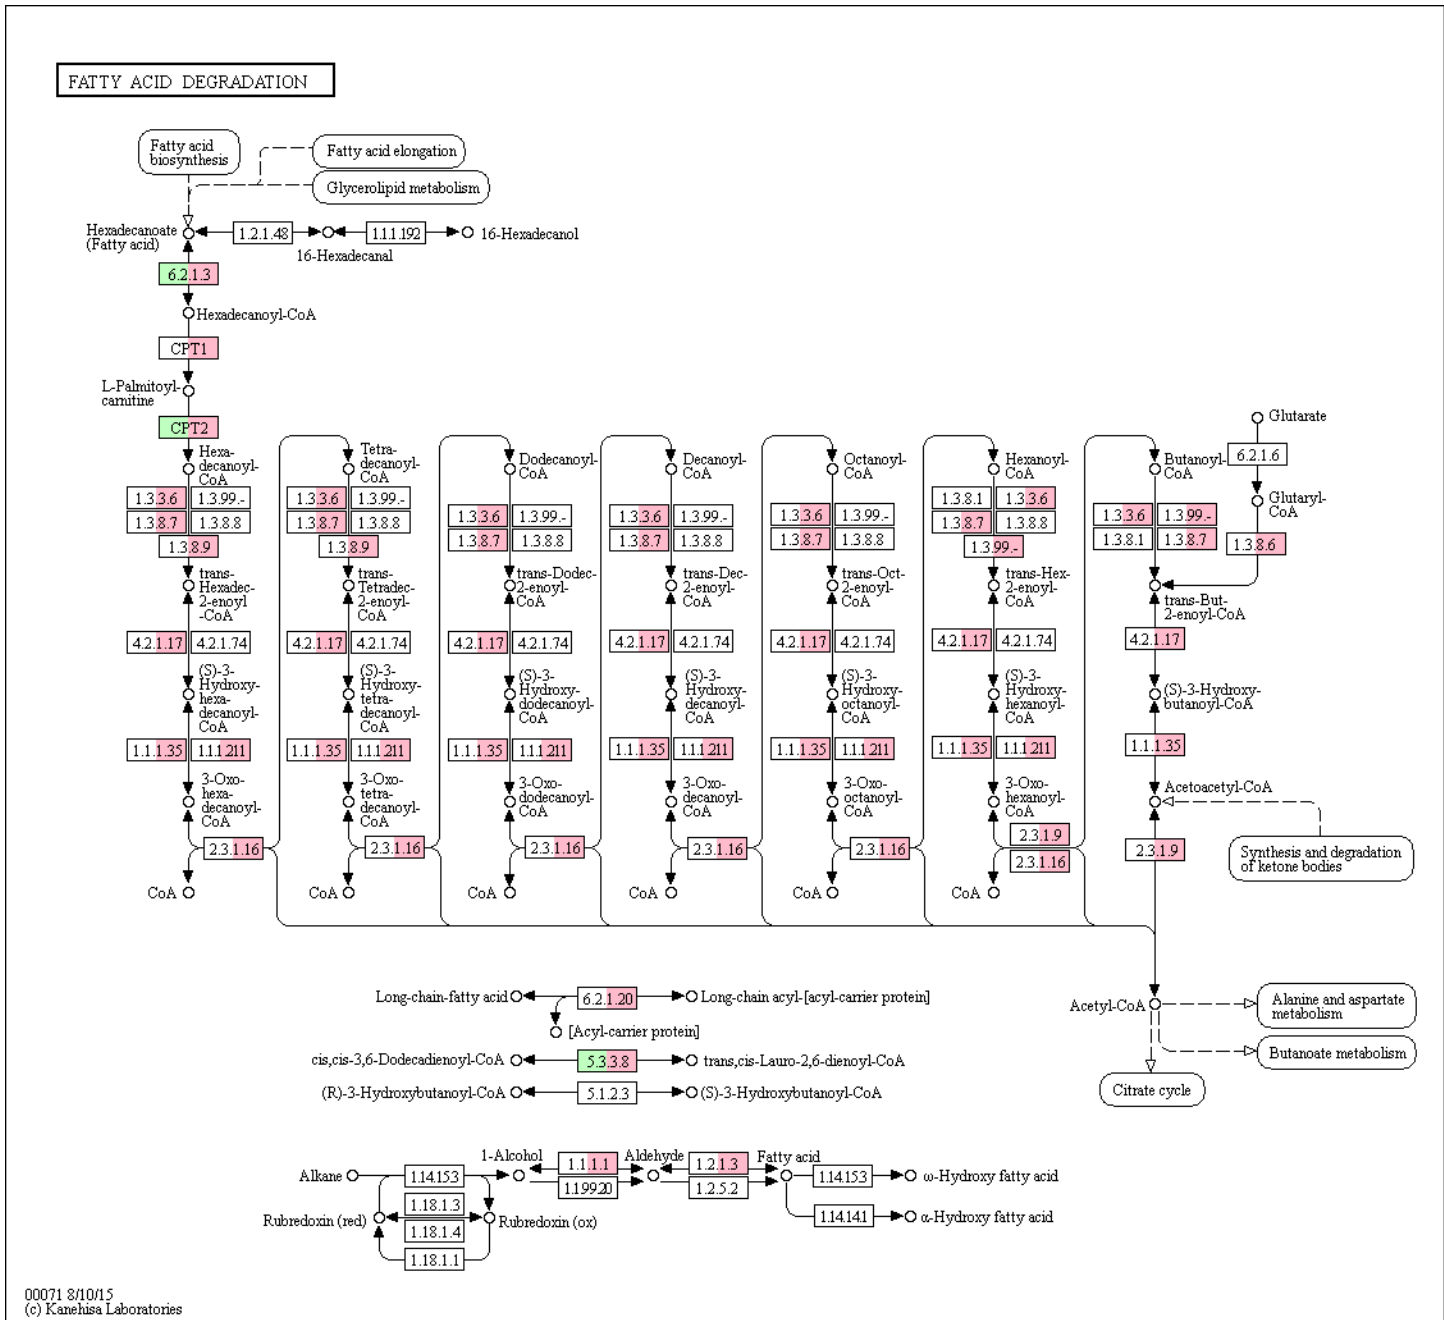

**Figure. S3.1.1d.** KEGG pathway showing fatty acid metabolism. Proteins with clear homologs in the endosymbiont *Perkinsela* sp. are highlighted green, while those encoded in the nuclear genome of the host *Paramoeba pemaquidensis* are highlighted red.

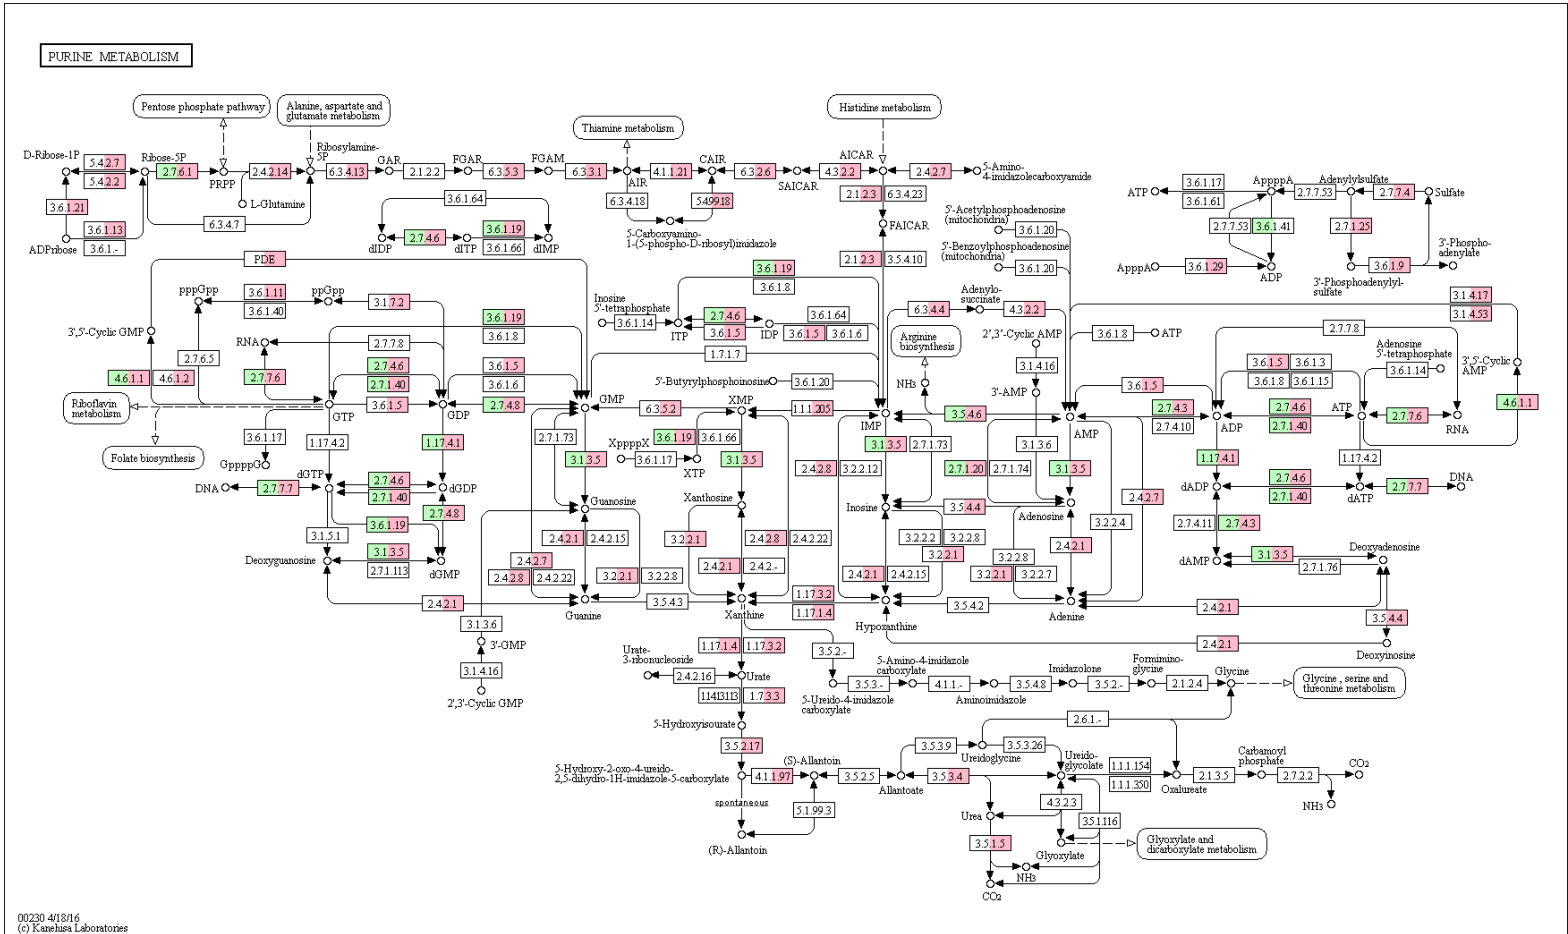

**Figure. S3.1.1e.** KEGG pathway showing purine metabolism. Proteins with clear homologs in the endosymbiont *Perkinsela* sp. are highlighted green, while those encoded in the nuclear genome of the host *Paramoeba pemaquidensis* are highlighted red. Green text corresponds to gene / enzyme names in bacteria.

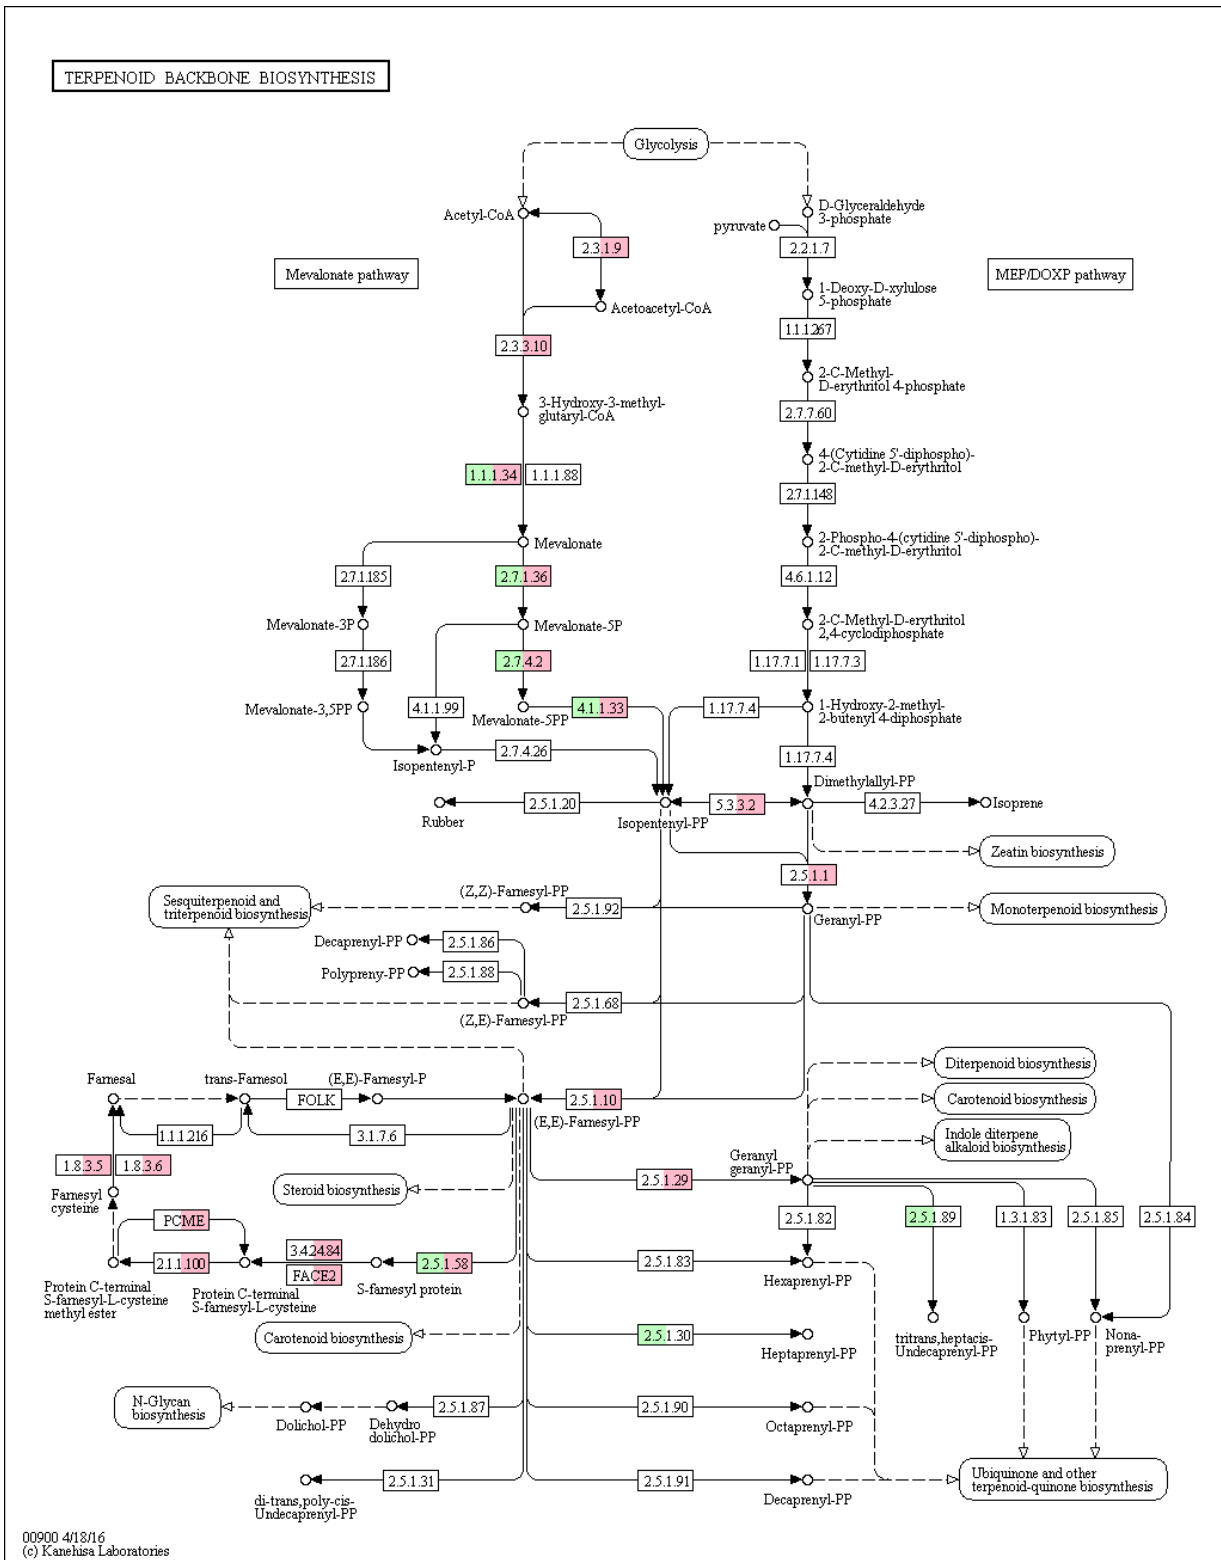

**Figure. S3.1.1f.** KEGG pathway showing terpenoid biosynthesis. Proteins with clear homologs in the endosymbiont *Perkinsela* sp. are highlighted green, while those encoded in the nuclear genome of the host *Paramecia pamaquidensis* are highlighted red.

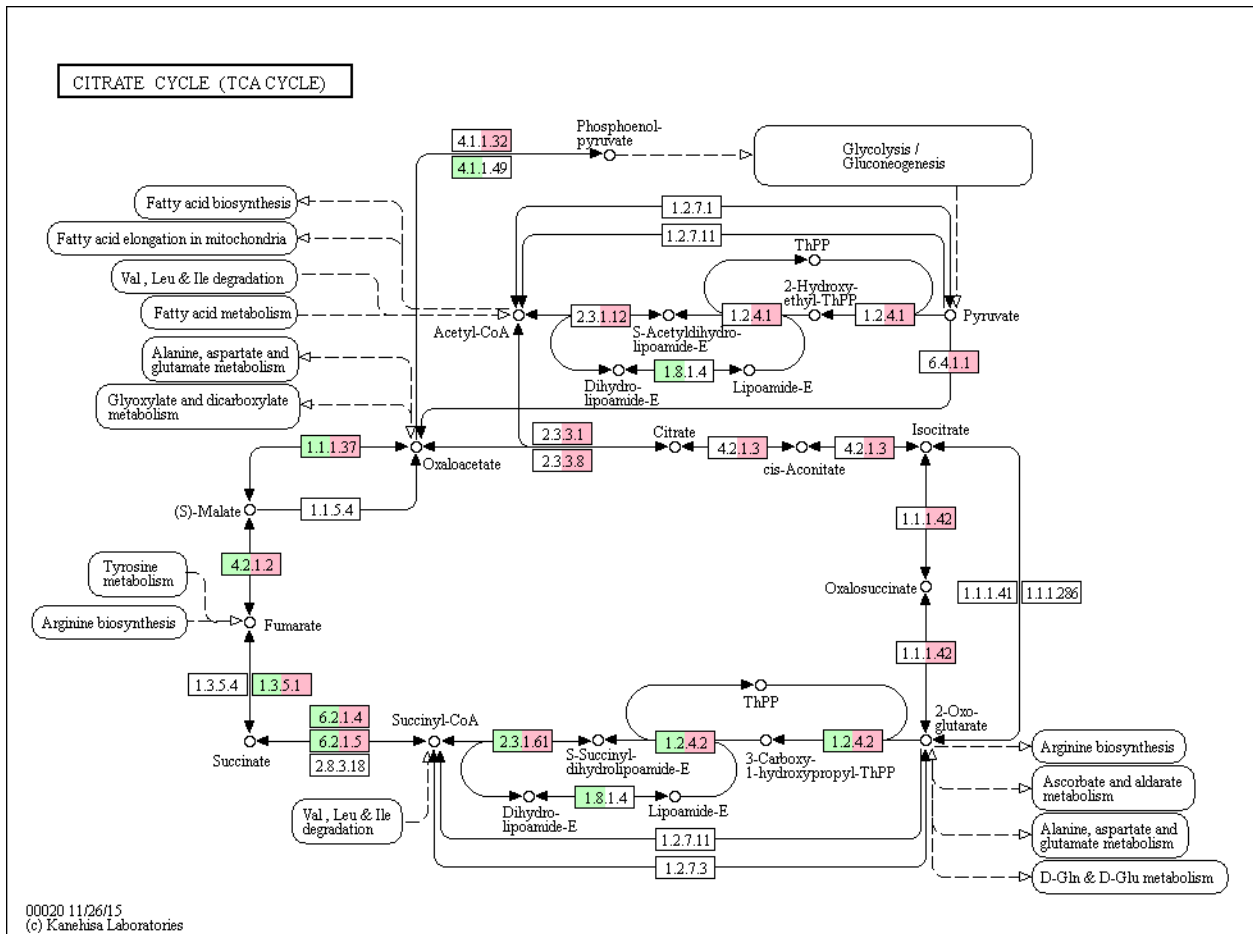

**Figure. S3.1.1g.** KEGG pathway showing the citrate cycle (tricarboxylic acid cycle). Proteins with clear homologs in the endosymbiont *Perkinsela* sp. are highlighted green, while those encoded in the nuclear genome of the host *Paramoeba pemaquidensis* are highlighted red.

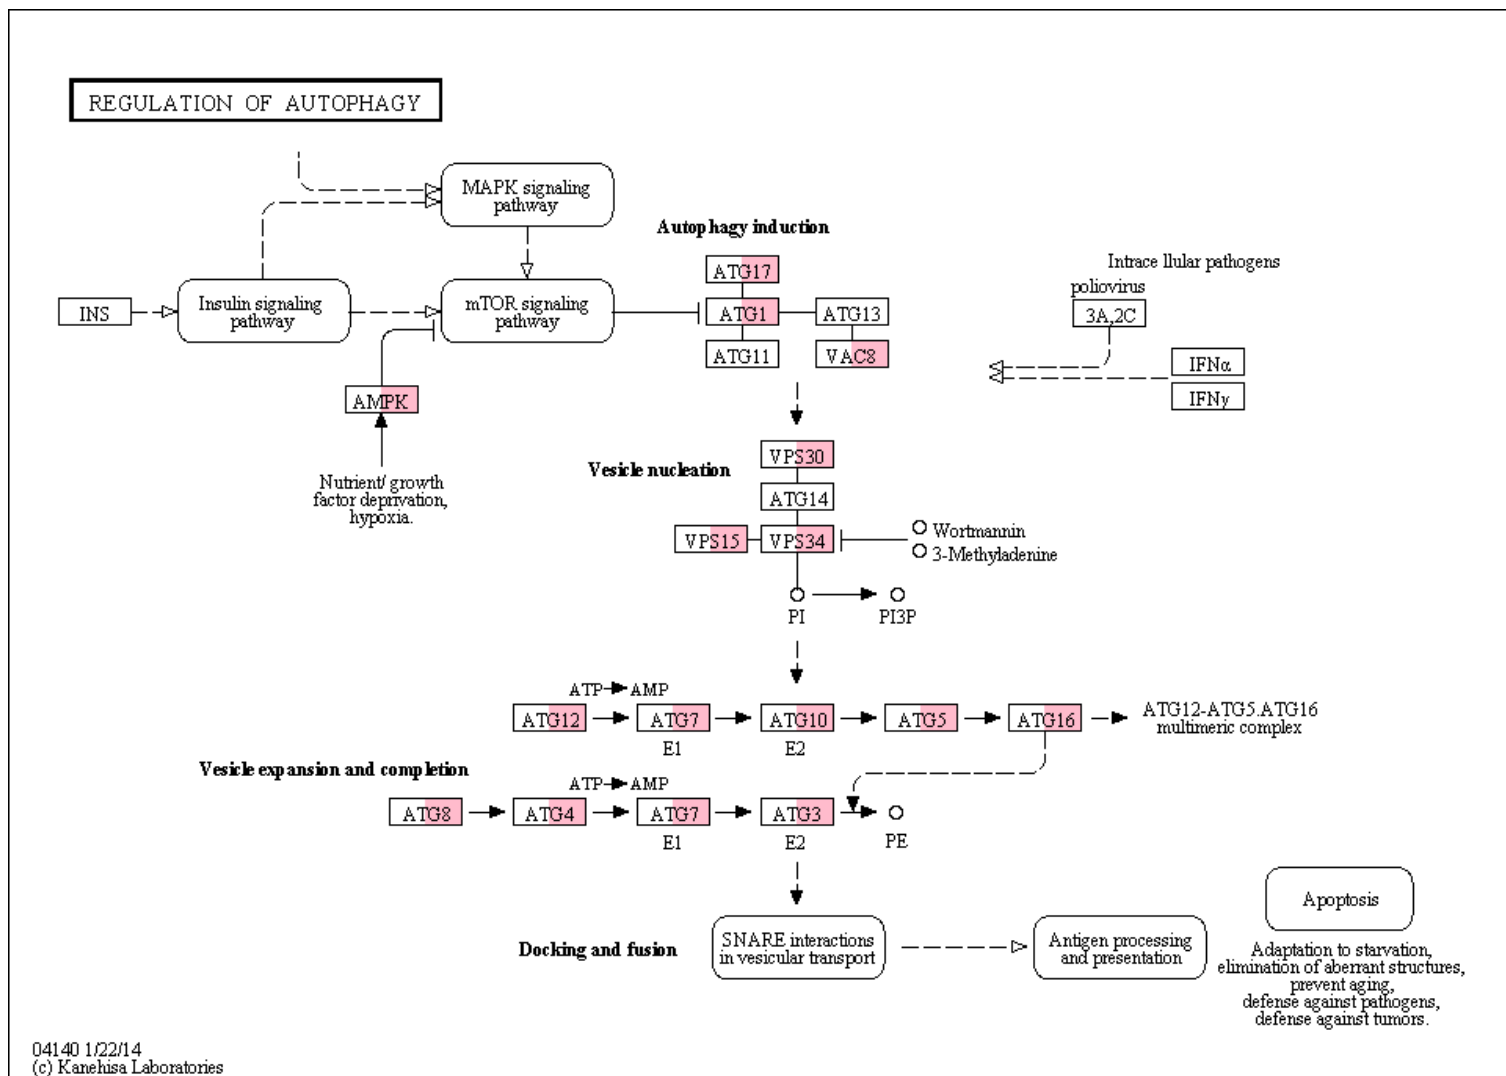

**Figure. S3.11.1.** KEGG pathway showing autophagy proteins. Proteins with clear homologs identified in the nuclear genome of *Paramoeba pemaquidensis* are highlighted red. No autophagy-associated proteins were identified in the nuclear genome of *Perkinsela. sp.*



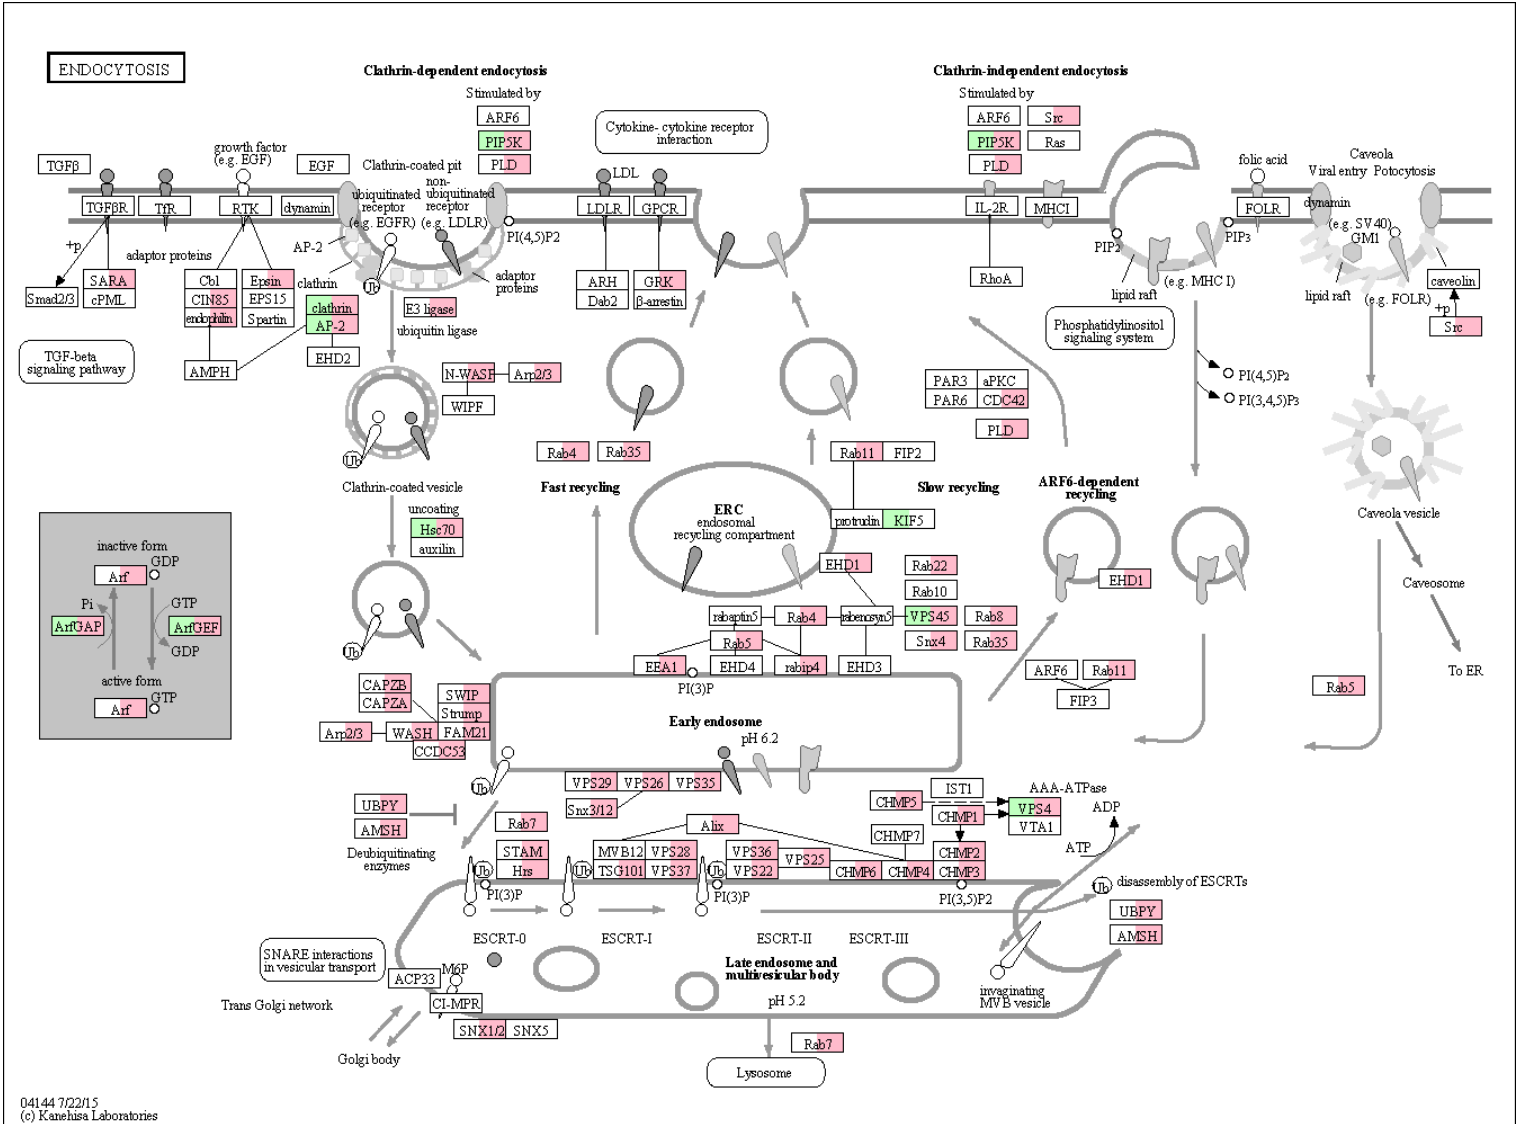

**Figure. S3.12.1.** KEGG pathway showing endocytosis-associated proteins. Proteins with clear homologs in *Perkinsela* sp. are highlighted green, while those found in the nuclear genome of *Paramoeba pemaquidensis* are shown in red.

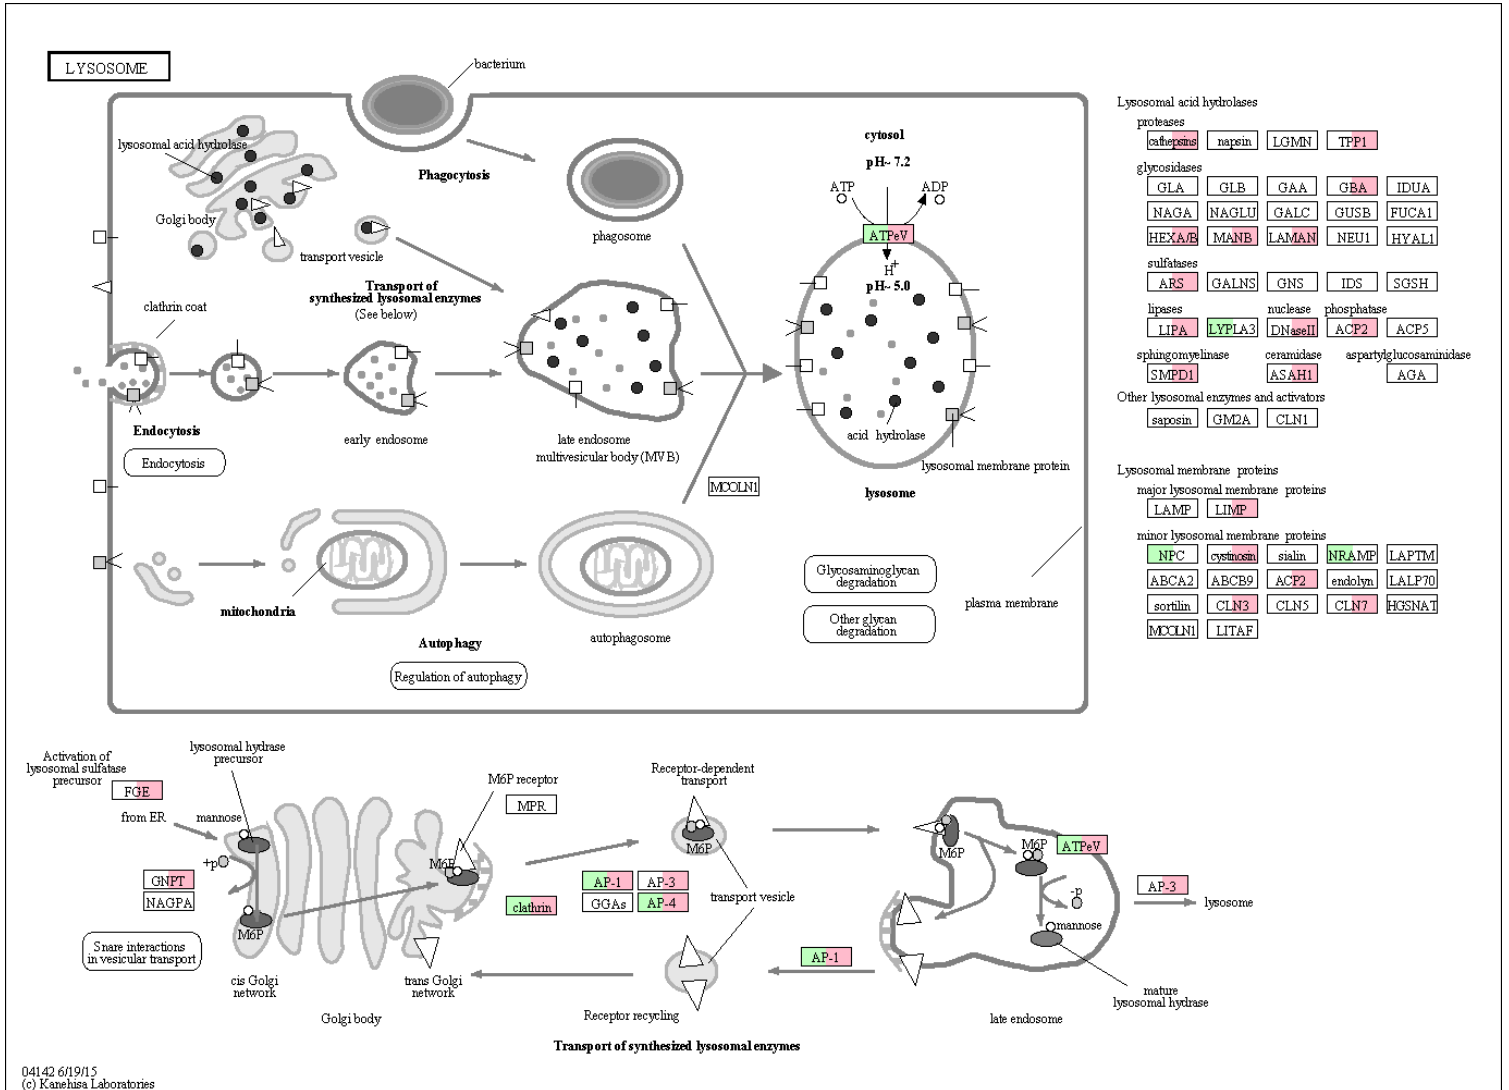

**Figure. S3.13.1.** KEGG pathway showing lysosome-associated proteins. Proteins with clear homologs in the endosymbiont *Perkinsela* sp. are highlighted green, while those encoded in the nuclear genome of the host *Paramoeba pemaquidensis* are highlighted red.

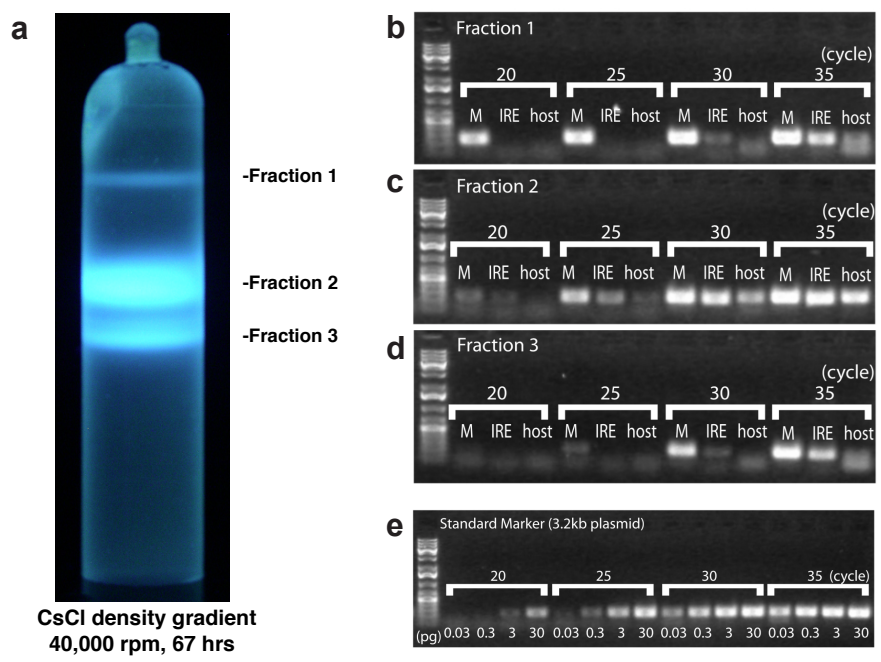

**Fig. S4.** Density gradient centrifugation and quantification of total DNA fractions isolated from *Paramoeba pemaquidensis* CCAP 1560/4 and its endosymbiont *Perkinsela* sp.

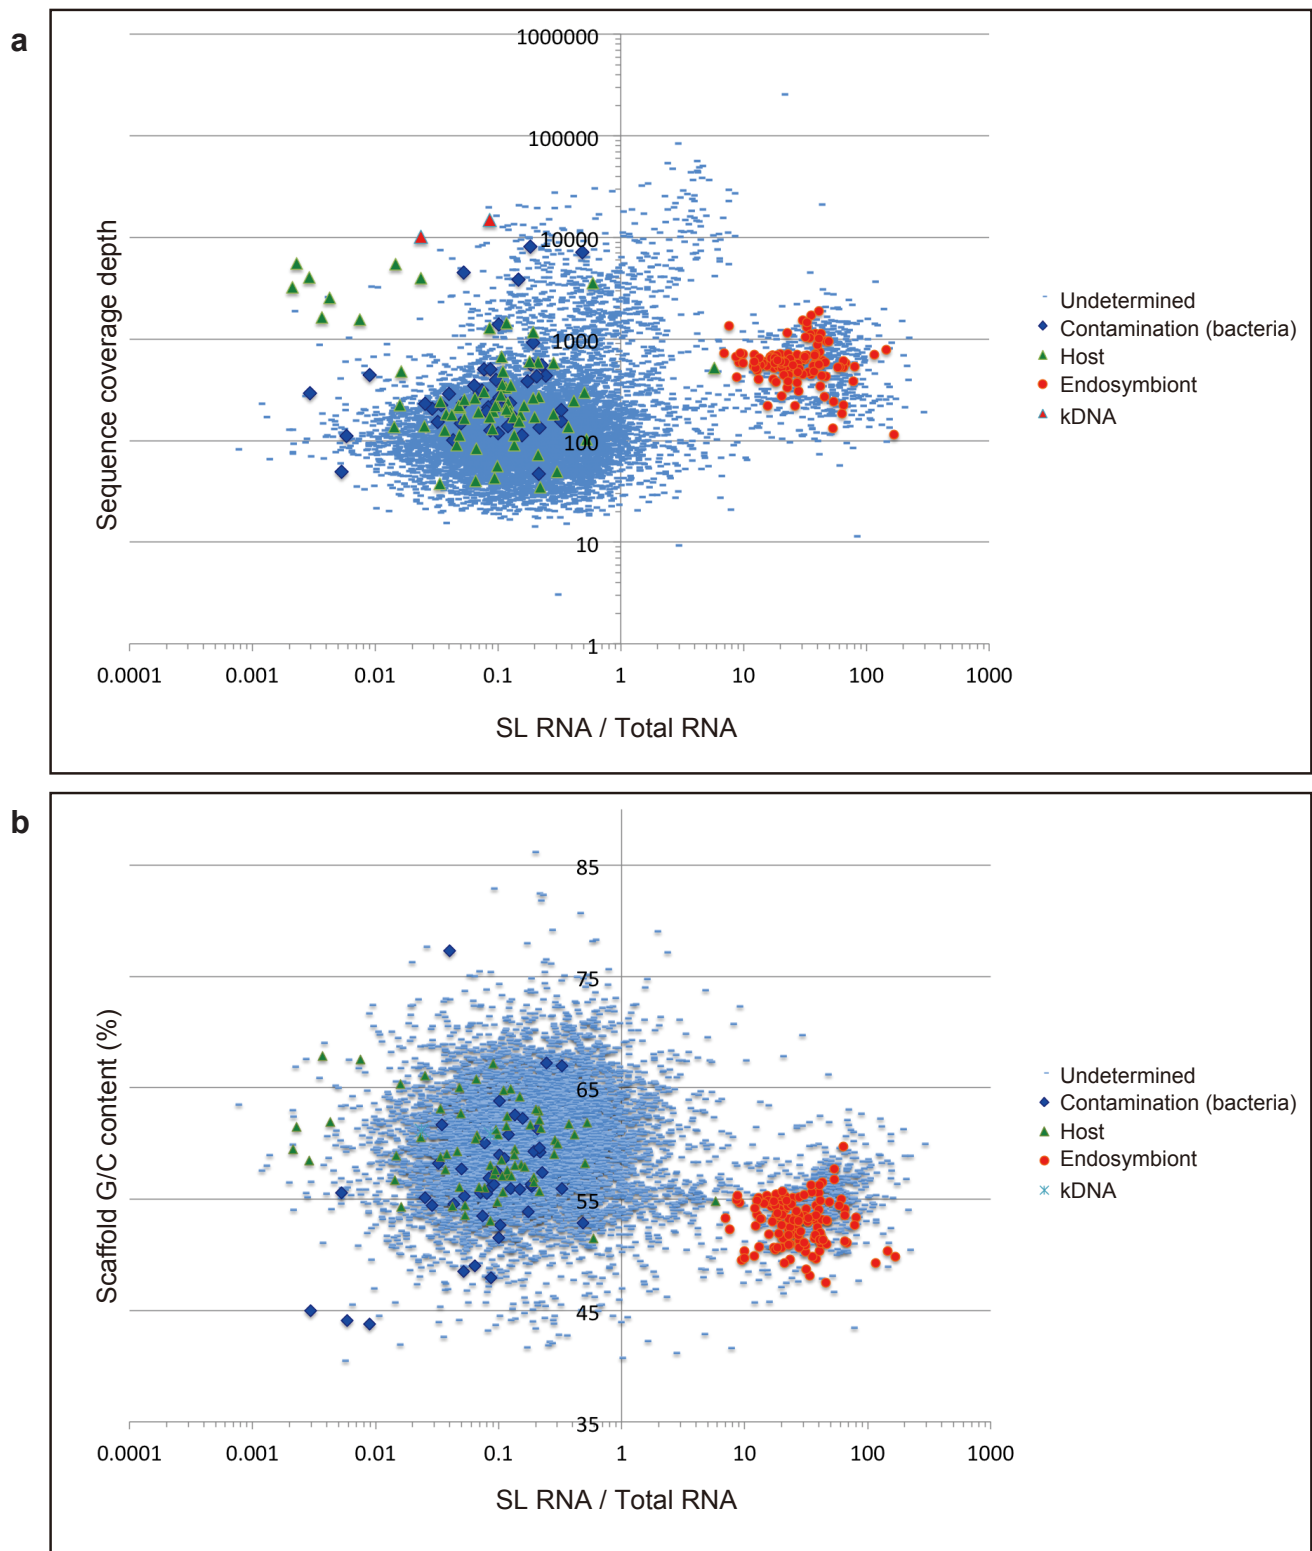

**Fig. S5.** RNA-seq-based *in silico* profiling of genomic scaffolds from *Paramoeba pemaquidensis* CCAP 1560/4 and its endosymbiont *Perkinsela* sp.

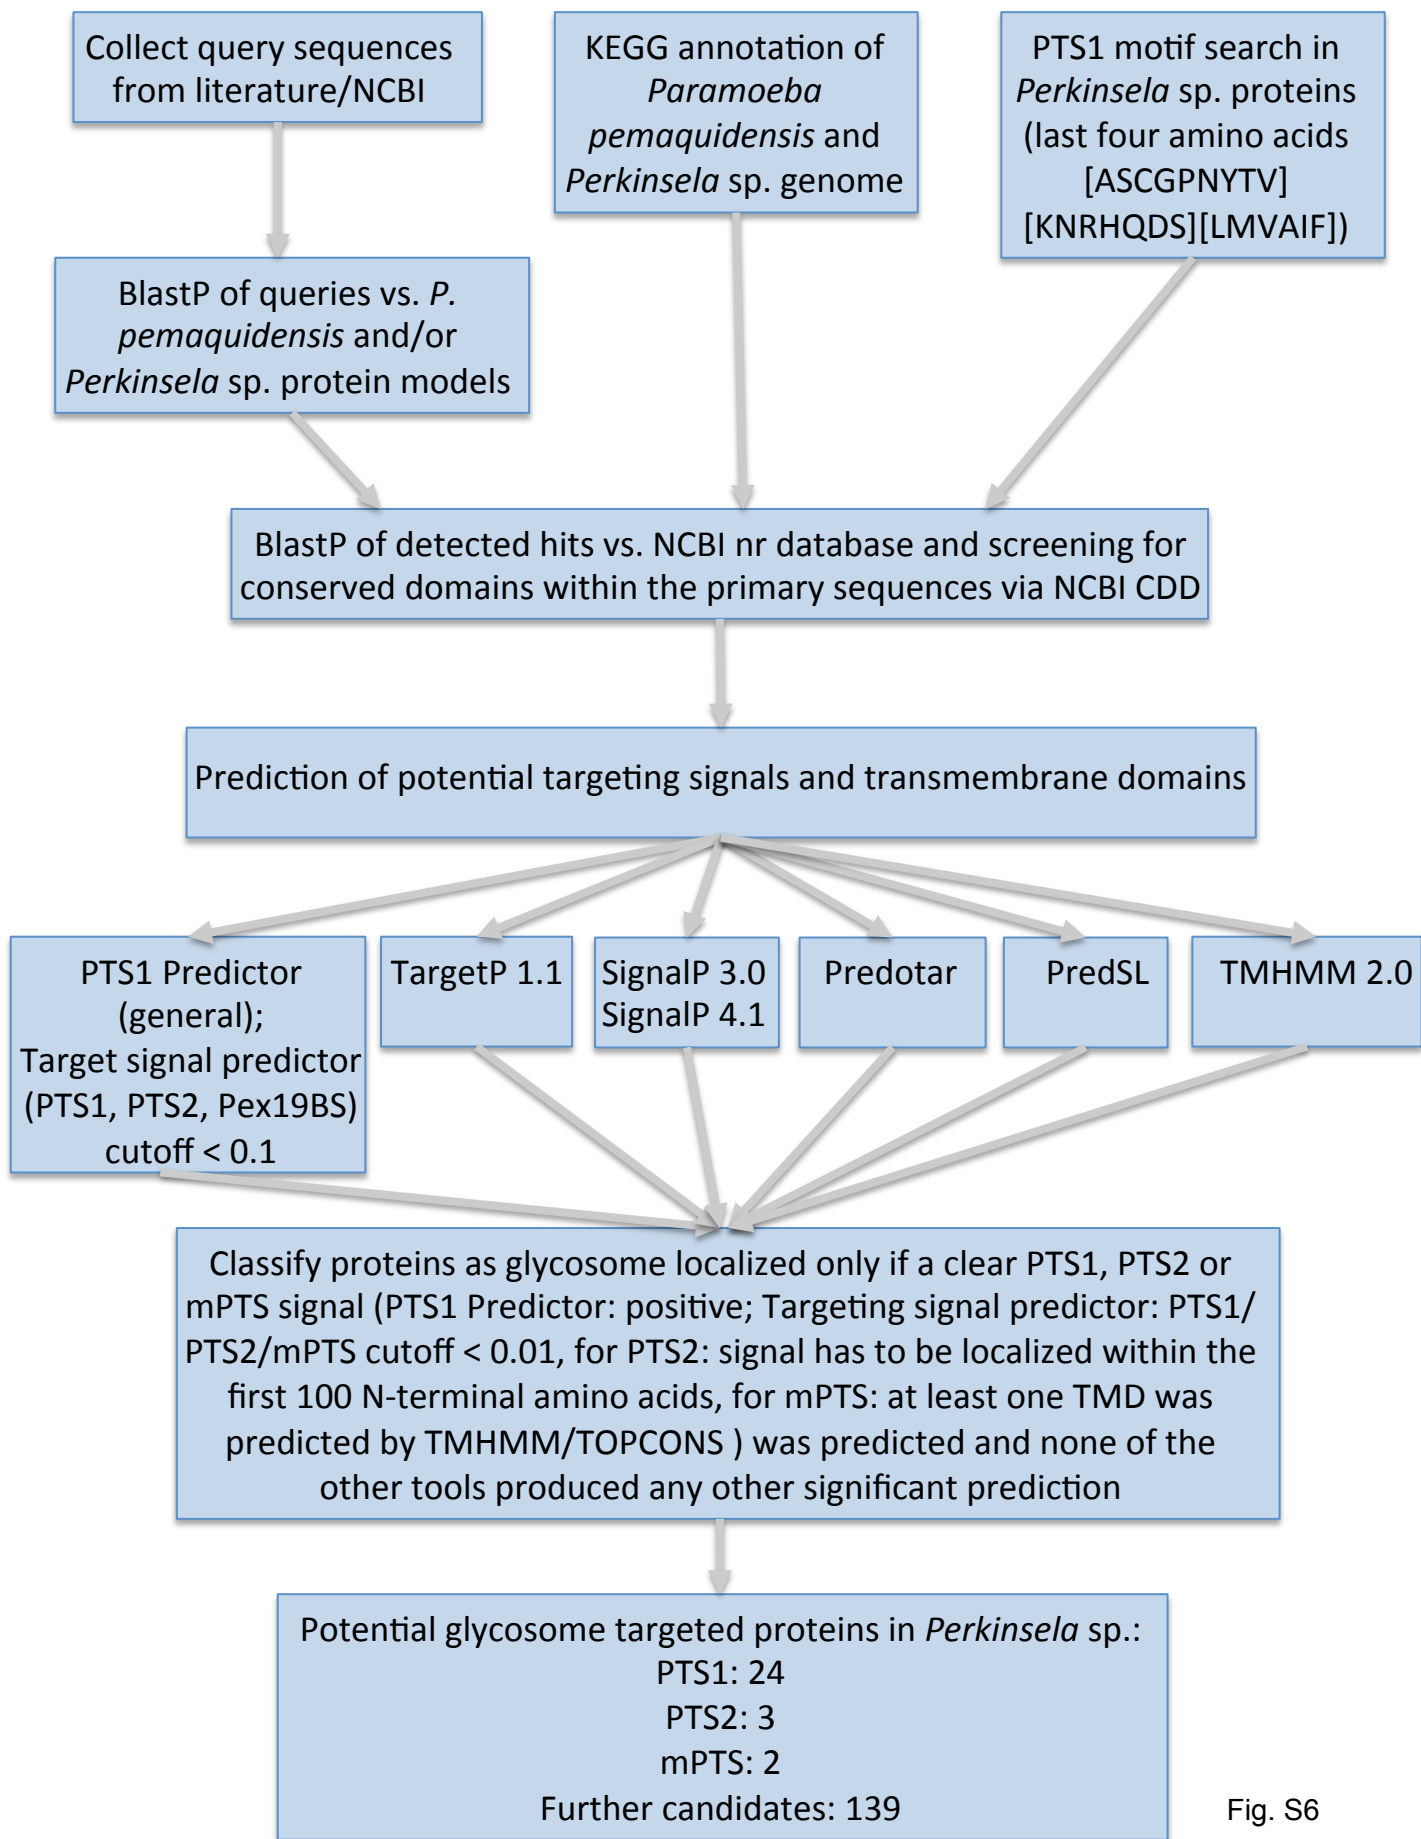

Fig. S6
